# Supplementary material for: High expression of MKK3 is associated with worse clinical outcomes in African American breast cancer patients
Source: J Transl Med. 2020 Sep 1;18:334. doi: 10.1186/s12967-020-02502-w (PMC7465409; doi:10.1186/s12967-020-02502-w)
Supplement: Supplementary file 1 — Additional file 1: Table S1. Differential gene expression analysis. Table S2. Modules of co-expressed genes identified with the Weighted Gene Co-expression Network Analysis (WGCNA). Table S3. Gene module pathway overrepresentation analysis. Table S4. Breast cancer patient survival analysis for genes upregulated in African American patients as compared to White patients. Table S5. Univariate COX regression survival analysis for TNBC Balck/African American patients. Table S6. Multivariate COX regression survival analysis for TNBC Balck/African American patients. Table S7. Analysis of genomic alterations of MKK3. Table S8. Genomic status of MKK3 (MAP2K3 gene) and p38 (MAPK14 gene) in BRCA patients and associated clinical data. Table S9. Correlation between MKK3 overexpression and breast cancer patient survival. Table S10. MKK3 gene set enrichment analysis using the MSigDB cancer Hallmark sets. Table S11. MKK3 gene set enrichment analysis for MYC-regulated gene sets. Table S12. Pathway overrepresentation analysis for MYC-dependent genes enriched in TNBC patients with overexpressed MKK3. [file 12967_2020_2502_MOESM1_ESM.xlsx]

## Sheet: Table S1
Table S1
Differential gene expression analysis
LOG2_MEAN_BAA: mean value of Log2(X+1) transformed mRNA expression in Black/African American patient cohort LOG2_MEAN_WT: mean value of Log2(X+1) transformed mRNA expression in White patient cohort LOG2_FOLD_CHANGE: Log2 fold change = LOG2_MEAN_BAA - LOG2_MEAN_WT FOLD_CHANGE - Fold Change calculated as 2^(LOG2_FOLD_CHANGE) PVALUE: Wilcoxon test p-value QVALUE: False discovery rate adjusted p-valu…
GENE	LOG2_MEAN_BAA	LOG2_MEAN_WT	LOG2_FOLD_CHANGE	FOLD_CHANGE	PVALUE	QVALUE	STATUS
AAK1	9.49756	9.82834	-0.330784	0.795104	1.73e-13	2.13e-12	DOWN
AASDHPPT	9.41877	9.74761	-0.328837	0.796178	1.04e-10	7.5e-10	DOWN
AASS	7.0088	7.5057	-0.4969	0.708628	3.88e-07	1.55e-06	DOWN
ABAT	8.48716	9.76929	-1.28213	0.411187	1.42e-13	1.78e-12	DOWN
ABCA1	9.06047	9.53125	-0.470785	0.721572	7.22e-11	5.34e-10	DOWN
ABCA11P	6.40223	6.72621	-0.32398	0.798863	2.26e-06	7.92e-06	DOWN
ABCA12	5.34733	6.84158	-1.49425	0.354966	7.36e-09	3.86e-08	DOWN
ABCA6	5.24286	6.18892	-0.946057	0.519049	6.03e-10	3.77e-09	DOWN
ABCA8	4.86654	5.8055	-0.938955	0.521611	2.84e-05	8.27e-05	DOWN
ABCA9	4.73941	5.68723	-0.947815	0.518417	3.26e-08	1.54e-07	DOWN
ABCB1	5.23431	5.99209	-0.75778	0.591406	1.43e-07	6.09e-07	DOWN
ABCB5	1.50857	2.26682	-0.758257	0.59121	8.1e-09	4.22e-08	DOWN
ABCC6	4.84086	5.65798	-0.817124	0.567572	7.58e-08	3.38e-07	DOWN
ABCC6P2	3.4142	3.94233	-0.528136	0.69345	2.43e-05	7.16e-05	DOWN
ABCC8	4.58061	5.89694	-1.31633	0.401555	2.62e-06	9.07e-06	DOWN
ABCC9	6.68715	7.54384	-0.856687	0.552219	1.02e-13	1.32e-12	DOWN
ABCD3	10.5511	11.0467	-0.495555	0.709289	2.54e-11	2.05e-10	DOWN
ABCG1	9.23299	9.87581	-0.642812	0.640463	8.78e-13	9.47e-12	DOWN
ABCG2	4.96361	5.96235	-0.998739	0.500437	7.91e-17	2.07e-15	DOWN
ABHD12B	1.78819	2.63161	-0.843417	0.557322	1.21e-07	5.22e-07	DOWN
ABHD13	8.46791	8.80723	-0.339315	0.790417	3.41e-13	3.97e-12	DOWN
ABHD2	11.4652	12.1328	-0.667657	0.629528	3.39e-14	4.83e-13	DOWN
ABI3BP	7.412	8.06186	-0.649861	0.637342	0.000375008	0.000904592	DOWN
ABLIM1	10.6694	11.1195	-0.450019	0.732033	3.5e-10	2.29e-09	DOWN
ABLIM3	8.24068	8.87273	-0.632058	0.645255	4.54e-05	0.000127823	DOWN
ACACB	8.17223	8.70369	-0.531455	0.691857	6.63e-07	2.56e-06	DOWN
ACADSB	9.7776	10.698	-0.920383	0.528369	2.19e-11	1.78e-10	DOWN
ACAP2	9.87016	10.2782	-0.40807	0.753631	1.57e-15	3.02e-14	DOWN
ACER2	5.45796	6.59779	-1.13983	0.453813	4e-18	1.46e-16	DOWN
ACER3	8.07417	8.55358	-0.479412	0.71727	7.58e-10	4.68e-09	DOWN
ACMSD	1.12211	1.80697	-0.684859	0.622067	0.000159264	0.000408569	DOWN
ACO1	9.47947	9.80397	-0.324502	0.798574	4.17e-09	2.27e-08	DOWN
ACOT4	7.31695	7.78368	-0.466735	0.7236	1.73e-05	5.23e-05	DOWN
ACOX2	6.5015	7.58375	-1.08225	0.472292	5.36e-09	2.87e-08	DOWN
ACSM5	3.61462	4.10575	-0.491126	0.71147	0.000172283	0.000439348	DOWN
ADAL	6.84415	7.39907	-0.554915	0.680697	4.58e-20	3.03e-18	DOWN
ADAM10	9.913	10.5152	-0.602192	0.658752	3.28e-12	3.15e-11	DOWN
ADAM12	9.96278	10.6404	-0.677624	0.625194	9.99e-08	4.37e-07	DOWN
ADAM22	4.2377	5.35068	-1.11298	0.462339	3.26e-14	4.67e-13	DOWN
ADAM23	3.87011	4.47136	-0.601248	0.659183	2.05e-06	7.23e-06	DOWN
ADAMTS12	6.86969	7.74783	-0.878142	0.544068	1.51e-09	8.84e-09	DOWN
ADAMTS15	5.77225	7.36154	-1.58929	0.332336	2.43e-13	2.9e-12	DOWN
ADAMTS18	3.46003	4.26696	-0.806928	0.571598	1.34e-06	4.9e-06	DOWN
ADAMTS2	8.21685	8.72575	-0.508898	0.702759	5.08e-05	0.000141843	DOWN
ADAMTS5	7.1336	7.78136	-0.647759	0.638271	7.39e-09	3.87e-08	DOWN
ADAMTSL1	6.1918	6.68783	-0.496028	0.709056	1.66e-05	5.03e-05	DOWN
ADAT1	7.558	8.00474	-0.446733	0.733703	7.1e-09	3.73e-08	DOWN
ADCY1	7.69958	8.64197	-0.942391	0.52037	8.35e-07	3.16e-06	DOWN
ADCY5	4.91831	6.04806	-1.12975	0.456995	8.94e-08	3.94e-07	DOWN
ADCY9	9.29761	9.86586	-0.568246	0.674436	1.35e-13	1.7e-12	DOWN
ADCYAP1R1	1.18435	1.54503	-0.360672	0.778802	5.32e-05	0.000147968	DOWN
ADH1A	1.32657	2.06425	-0.73768	0.599703	5.73e-06	1.87e-05	DOWN
ADH1B	5.98376	7.36083	-1.37707	0.385	6.97e-06	2.25e-05	DOWN
ADIPOQ	5.54123	7.09803	-1.5568	0.339905	8.82e-07	3.32e-06	DOWN
ADNP	11.353	11.7543	-0.40132	0.757165	2.46e-11	1.99e-10	DOWN
ADORA3	6.89877	7.27697	-0.378203	0.769395	1.47e-05	4.5e-05	DOWN
AFF1	10.2191	10.842	-0.622895	0.649366	1.86e-19	1e-17	DOWN
AFF3	8.71512	10.1999	-1.48483	0.357291	2.86e-08	1.36e-07	DOWN
AFF4	10.9689	11.6611	-0.69214	0.618935	1.65e-23	3.84e-21	DOWN
AFTPH	10.5641	10.9266	-0.362465	0.777835	6.08e-18	2.13e-16	DOWN
AGGF1	9.49756	9.87594	-0.378373	0.769305	3.43e-16	7.67e-15	DOWN
AGL	9.56277	10.1736	-0.610873	0.6548	2.33e-09	1.32e-08	DOWN
AGPS	9.45215	9.9482	-0.496053	0.709044	1.33e-10	9.43e-10	DOWN
AGR2	10.0803	11.7327	-1.65233	0.318127	5.33e-05	0.000148198	DOWN
AGR3	7.08111	9.25748	-2.17637	0.221231	1.05e-05	3.29e-05	DOWN
AGTR1	5.26127	6.66429	-1.40302	0.378138	2.38e-12	2.37e-11	DOWN
AHCYL1	11.5869	11.9343	-0.347329	0.786038	1.07e-13	1.38e-12	DOWN
AHCYL2	8.95283	9.33616	-0.38333	0.766666	1.08e-07	4.69e-07	DOWN
AHNAK	14.1143	14.9085	-0.794181	0.57667	1.99e-22	2.9e-20	DOWN
AHR	10.1261	10.7508	-0.624706	0.648552	1.32e-11	1.13e-10	DOWN
AK5	5.43982	6.61767	-1.17784	0.442012	1.84e-09	1.06e-08	DOWN
AK7	3.59995	4.26423	-0.664282	0.631003	4.33e-07	1.71e-06	DOWN
AKAP10	8.22761	8.68192	-0.454315	0.729856	8.29e-09	4.31e-08	DOWN
AKAP11	9.73686	10.3509	-0.614029	0.65337	6.17e-19	2.83e-17	DOWN
AKAP12	8.26477	9.13355	-0.868774	0.547612	1.47e-13	1.83e-12	DOWN
AKAP2	8.05184	8.90054	-0.848705	0.555283	5.28e-08	2.41e-07	DOWN
AKAP5	6.3627	7.28927	-0.926571	0.526107	4.83e-15	8.22e-14	DOWN
AKAP6	5.18399	5.71112	-0.527127	0.693935	6.07e-08	2.74e-07	DOWN
AKAP9	10.6579	11.2884	-0.630476	0.645963	5.33e-17	1.47e-15	DOWN
AKR7A3	6.70304	7.82542	-1.12237	0.459337	2.76e-06	9.52e-06	DOWN
ALCAM	11.1621	11.7901	-0.627963	0.64709	6.67e-08	2.99e-07	DOWN
ALDH1A1	7.8773	8.41006	-0.532754	0.691234	4.78e-06	1.58e-05	DOWN
ALDH6A1	7.83643	8.57821	-0.741778	0.598002	1.47e-15	2.85e-14	DOWN
ALG10	6.50125	6.87535	-0.374093	0.77159	8.08e-10	4.97e-09	DOWN
ALG10B	7.69418	8.2472	-0.553021	0.681591	1.41e-14	2.16e-13	DOWN
ALKBH8	7.29494	7.76707	-0.472128	0.720901	2.83e-18	1.08e-16	DOWN
ALMS1	9.36197	9.76031	-0.398343	0.758729	6.9e-12	6.21e-11	DOWN
AMACR	8.2144	8.69012	-0.475719	0.719108	1.01e-11	8.82e-11	DOWN
AMIGO2	8.8546	9.31449	-0.459895	0.727039	0.000123281	0.000323493	DOWN
AMOTL1	9.24435	9.63602	-0.391666	0.762249	9.92e-05	0.000264416	DOWN
AMPH	5.45833	6.54367	-1.08534	0.47128	3.13e-12	3.01e-11	DOWN
ANGPT2	7.53613	7.98682	-0.450687	0.731694	6.93e-07	2.66e-06	DOWN
ANGPT4	0.742607	1.12335	-0.380747	0.76804	6.97e-07	2.67e-06	DOWN
ANGPTL1	4.39484	5.28551	-0.890663	0.539366	1.06e-09	6.39e-09	DOWN
ANGPTL2	9.80562	10.2389	-0.433328	0.740551	1.3e-05	4.01e-05	DOWN
ANK2	7.17529	7.65139	-0.476097	0.71892	4.38e-05	0.000123682	DOWN
ANKHD1	10.733	11.1332	-0.400204	0.757751	2.15e-15	4.04e-14	DOWN
ANKHD1-EIF4EBP3	9.29113	9.86837	-0.577238	0.670246	4.42e-15	7.59e-14	DOWN
ANKIB1	10.2717	10.5991	-0.32741	0.796966	1.3e-08	6.56e-08	DOWN
ANKRA2	7.8234	8.17007	-0.346668	0.786398	8.54e-08	3.77e-07	DOWN
ANKRD12	9.63209	10.1782	-0.546125	0.684857	8.44e-16	1.73e-14	DOWN
ANKRD17	10.9246	11.4038	-0.479256	0.717348	2.18e-16	5.08e-15	DOWN
ANKRD26	7.66104	8.13748	-0.476437	0.71875	1.86e-10	1.27e-09	DOWN
ANKRD29	4.57419	5.34858	-0.77439	0.584636	3.58e-09	1.97e-08	DOWN
ANKRD30A	4.82948	7.25156	-2.42207	0.186588	6.43e-11	4.8e-10	DOWN
ANKRD30B	4.29695	5.37096	-1.07401	0.474997	4.9e-05	0.000137262	DOWN
ANKRD31	1.0011	1.45574	-0.454637	0.729694	7.63e-09	3.99e-08	DOWN
ANKRD36BP1	5.86953	6.55902	-0.689496	0.620071	4.24e-06	1.42e-05	DOWN
ANKRD42	7.81604	8.29861	-0.482573	0.7157	8.32e-12	7.37e-11	DOWN
ANKRD44	5.42027	5.9097	-0.489431	0.712306	0.000156132	0.000401312	DOWN
ANKRD50	9.92231	10.5716	-0.649313	0.637584	3.05e-14	4.39e-13	DOWN
ANKS1B	5.92655	6.59254	-0.665989	0.630257	3.98e-09	2.17e-08	DOWN
ANO3	2.0102	2.76535	-0.755156	0.592483	9.26e-05	0.000248169	DOWN
ANO5	3.72667	4.51161	-0.784948	0.580373	1.7e-05	5.15e-05	DOWN
ANO6	10.4199	11.0112	-0.591275	0.663756	4.65e-23	8.79e-21	DOWN
ANTXR1	11.4065	11.943	-0.536483	0.68945	1.53e-07	6.49e-07	DOWN
ANTXR2	9.01038	9.36417	-0.353788	0.782527	8.55e-06	2.71e-05	DOWN
AOC3	8.55132	9.28291	-0.731585	0.602242	9.42e-10	5.72e-09	DOWN
AOX1	6.19354	6.79331	-0.59977	0.659859	5.49e-05	0.000152253	DOWN
AP1AR	9.06513	9.49227	-0.427143	0.743733	3.41e-11	2.69e-10	DOWN
AP2B1	12.5553	12.9501	-0.394848	0.760569	1.69e-10	1.17e-09	DOWN
AP3B1	10.1897	10.5182	-0.328508	0.79636	7.54e-16	1.56e-14	DOWN
APAF1	8.62331	8.98582	-0.362517	0.777806	1.18e-11	1.02e-10	DOWN
APBB2	10.3433	11.0307	-0.687412	0.620967	2.06e-15	3.88e-14	DOWN
APC	9.06958	9.71622	-0.646632	0.63877	1.4e-23	3.35e-21	DOWN
APH1B	8.35456	8.94543	-0.590869	0.663943	3.76e-13	4.35e-12	DOWN
APOB	1.53125	1.97355	-0.442303	0.735959	0.000386088	0.000929365	DOWN
APOF	1.69104	2.50883	-0.817795	0.567308	2.68e-07	1.1e-06	DOWN
APOL4	7.01055	7.68095	-0.670402	0.628332	1.34e-05	4.13e-05	DOWN
APOOL	6.75463	7.43437	-0.679739	0.624278	1.54e-14	2.34e-13	DOWN
APPBP2	9.94018	10.3355	-0.395364	0.760298	3.47e-13	4.03e-12	DOWN
APPL1	10.2601	10.7256	-0.465485	0.724228	3.16e-20	2.2e-18	DOWN
APPL2	9.57755	9.93711	-0.359561	0.779402	5.3e-10	3.35e-09	DOWN
AQP1	10.9865	11.384	-0.397465	0.759191	0.000134469	0.000350499	DOWN
AQR	9.64712	10.1599	-0.512743	0.700888	5.99e-19	2.76e-17	DOWN
AR	6.28366	8.32311	-2.03945	0.243257	6.51e-17	1.74e-15	DOWN
ARCN1	11.7895	12.1212	-0.331774	0.794559	1.12e-14	1.75e-13	DOWN
ARFGEF1	11.0129	11.3752	-0.362265	0.777942	4.21e-08	1.95e-07	DOWN
ARFGEF2	10.7779	11.2546	-0.476727	0.718606	6.66e-11	4.96e-10	DOWN
ARFIP1	9.76254	10.1079	-0.345362	0.787111	5.76e-11	4.35e-10	DOWN
ARHGAP12	9.25493	9.72624	-0.471309	0.72131	1.49e-14	2.27e-13	DOWN
ARHGAP18	8.97685	9.38187	-0.405017	0.755227	6.42e-12	5.82e-11	DOWN
ARHGAP20	4.45492	5.34023	-0.885306	0.541373	2.27e-13	2.73e-12	DOWN
ARHGAP24	7.09062	7.50737	-0.416758	0.749106	8.36e-08	3.7e-07	DOWN
ARHGAP26	8.04977	8.43876	-0.388984	0.763667	6.12e-05	0.00016853	DOWN
ARHGAP28	6.35777	6.7842	-0.426435	0.744098	7.72e-05	0.00020944	DOWN
ARHGAP29	10.1688	10.8272	-0.658425	0.63357	3.63e-14	5.12e-13	DOWN
ARHGAP31	8.91261	9.31835	-0.405743	0.754848	7.24e-07	2.77e-06	DOWN
ARHGAP32	10.1486	10.8797	-0.731117	0.602437	1.19e-16	2.96e-15	DOWN
ARHGAP42	6.08723	6.68498	-0.597748	0.660785	1.59e-09	9.27e-09	DOWN
ARHGAP5	10.1085	10.7139	-0.605366	0.657305	3.24e-18	1.22e-16	DOWN
ARHGAP6	5.28088	5.82905	-0.548174	0.683885	6.76e-09	3.56e-08	DOWN
ARHGEF12	11.2942	12.0509	-0.756698	0.591849	1.42e-26	1.74e-23	DOWN
ARHGEF38	3.81939	4.81769	-0.9983	0.500589	3.15e-10	2.08e-09	DOWN
ARHGEF6	9.50369	9.88726	-0.383564	0.766541	0.00018618	0.000471782	DOWN
ARID2	9.40667	10.0361	-0.62943	0.646432	4.25e-23	8.24e-21	DOWN
ARID4A	8.4695	8.97377	-0.504264	0.70502	2.36e-15	4.35e-14	DOWN
ARID4B	10.2837	10.636	-0.352299	0.783335	1.97e-11	1.62e-10	DOWN
ARID5B	9.99832	10.4504	-0.452065	0.730996	6.55e-09	3.46e-08	DOWN
ARL10	4.16388	4.532	-0.368129	0.774786	0.000186298	0.000472012	DOWN
ARL13B	7.37605	7.79576	-0.419713	0.747573	1.2e-11	1.04e-10	DOWN
ARL1	11.0547	11.3815	-0.326799	0.797303	1.86e-12	1.88e-11	DOWN
ARL15	7.34264	8.17648	-0.833843	0.561033	8.26e-18	2.79e-16	DOWN
ARL17A	5.94376	6.48629	-0.542536	0.686563	1.2e-14	1.86e-13	DOWN
ARL5B	7.59463	7.98152	-0.386891	0.764776	1.73e-05	5.23e-05	DOWN
ARNT2	9.01146	9.84491	-0.833451	0.561185	2.14e-09	1.22e-08	DOWN
ARPP19	11.5542	11.8822	-0.32791	0.79669	1.25e-11	1.08e-10	DOWN
ARRDC3	10.3294	10.6881	-0.358727	0.779852	6.1e-07	2.36e-06	DOWN
ARRDC4	8.48281	8.84204	-0.359235	0.779578	4.23e-05	0.000119682	DOWN
ARSD	10.9684	11.3329	-0.364495	0.776741	3.05e-06	1.04e-05	DOWN
ARSG	7.32147	8.14413	-0.822661	0.565398	7.05e-09	3.7e-08	DOWN
ASAH1	11.6982	12.4302	-0.731994	0.602071	1.43e-18	5.83e-17	DOWN
ASAH2	2.02636	2.61941	-0.593053	0.662939	2.92e-09	1.62e-08	DOWN
ASCC3	9.76689	10.17	-0.403071	0.756247	4.92e-10	3.14e-09	DOWN
ASH1L	10.7888	11.3727	-0.583862	0.667175	1.12e-16	2.81e-15	DOWN
ASPA	2.28796	2.93362	-0.645666	0.639198	4.89e-08	2.25e-07	DOWN
ASPH	11.7519	12.2458	-0.493874	0.710115	5.33e-09	2.86e-08	DOWN
ASPN	9.56542	10.381	-0.815607	0.568169	8.91e-06	2.82e-05	DOWN
ASTN1	2.83446	3.38001	-0.54555	0.68513	0.000159775	0.000409758	DOWN
ASTN2	7.42569	8.04838	-0.622693	0.649457	1.13e-05	3.52e-05	DOWN
ASXL2	8.18201	9.1073	-0.925293	0.526574	4.59e-18	1.66e-16	DOWN
ASXL3	1.99254	2.54987	-0.557332	0.679558	2.58e-06	8.95e-06	DOWN
ATE1	7.04012	7.76571	-0.725588	0.604751	3.74e-16	8.32e-15	DOWN
ATF2	8.21102	8.8433	-0.632277	0.645157	1.77e-16	4.22e-15	DOWN
ATF6	10.5018	10.8617	-0.359909	0.779213	9.7e-14	1.26e-12	DOWN
ATF7	10.0993	10.5345	-0.435271	0.739555	6.96e-20	4.34e-18	DOWN
ATF7IP	9.63886	10.0405	-0.401651	0.756992	7.14e-09	3.75e-08	DOWN
ATG2B	9.20832	9.78088	-0.572567	0.672419	2.84e-22	3.76e-20	DOWN
ATL3	8.74111	9.17476	-0.433655	0.740384	4.88e-12	4.53e-11	DOWN
ATM	9.45142	9.85561	-0.404188	0.755661	2.35e-08	1.13e-07	DOWN
ATP10D	8.17939	8.55766	-0.378265	0.769362	1.35e-06	4.93e-06	DOWN
ATP13A3	10.7799	11.1228	-0.34289	0.78846	7.19e-08	3.22e-07	DOWN
ATP1A2	3.99986	4.73475	-0.73489	0.600864	2.36e-05	6.96e-05	DOWN
ATP1A4	2.19269	3.71592	-1.52323	0.347906	6.24e-17	1.69e-15	DOWN
ATP1B1	11.3151	11.8356	-0.520519	0.697121	3.47e-08	1.63e-07	DOWN
ATP2A2	12.1884	12.5109	-0.322571	0.799644	8.59e-11	6.29e-10	DOWN
ATP2B1	9.61955	10.0741	-0.45455	0.729738	2.4e-09	1.35e-08	DOWN
ATP2B4	11.2247	11.5526	-0.327969	0.796657	1.17e-05	3.64e-05	DOWN
ATP6V1G2	4.54425	4.95959	-0.415339	0.749843	0.000210202	0.000528144	DOWN
ATP7A	8.53169	9.10897	-0.577284	0.670224	3.26e-15	5.77e-14	DOWN
ATP7B	7.82661	8.63483	-0.808222	0.571085	4e-10	2.59e-09	DOWN
ATP8B1	10.008	10.8097	-0.801721	0.573664	2.51e-17	7.53e-16	DOWN
ATP8B2	9.18874	9.57521	-0.386478	0.764995	6.32e-05	0.000173621	DOWN
ATRN	10.6018	10.9583	-0.356488	0.781064	5.64e-14	7.71e-13	DOWN
ATRNL1	4.39034	5.15561	-0.765262	0.588347	0.000300166	0.000735501	DOWN
ATRX	10.3402	10.9326	-0.592412	0.663233	1.31e-19	7.34e-18	DOWN
ATXN1	9.51383	9.97707	-0.463243	0.725354	8.99e-13	9.66e-12	DOWN
ATXN1L	9.66689	10.018	-0.351076	0.783999	4.44e-10	2.86e-09	DOWN
ATXN7	8.93609	9.31256	-0.376475	0.770317	4.49e-12	4.2e-11	DOWN
AVL9	8.24011	8.69109	-0.450985	0.731543	1.88e-11	1.55e-10	DOWN
AVPR1A	3.80154	4.79161	-0.990077	0.503451	1.53e-12	1.57e-11	DOWN
AXIN2	7.15868	7.59875	-0.440072	0.737098	0.000390321	0.000938504	DOWN
B3GALT2	2.07294	2.46405	-0.391115	0.76254	7.58e-05	0.000205934	DOWN
B3GALT5	3.61229	4.50359	-0.891296	0.539129	8.67e-06	2.75e-05	DOWN
BACE1	9.46106	9.81325	-0.352194	0.783392	7.56e-11	5.57e-10	DOWN
BACH1	9.14475	9.55465	-0.409896	0.752678	3.09e-08	1.46e-07	DOWN
BAG4	7.20357	7.85676	-0.653197	0.63587	4.16e-12	3.93e-11	DOWN
BAGE2	1.52874	2.18988	-0.661137	0.63238	5.57e-11	4.21e-10	DOWN
BARD1	6.11478	6.81217	-0.697385	0.616689	8.36e-06	2.66e-05	DOWN
BAZ2A	11.1054	11.4509	-0.345507	0.787031	5.44e-12	5e-11	DOWN
BAZ2B	9.01024	9.55987	-0.54963	0.683196	2.99e-16	6.76e-15	DOWN
BBS10	7.98971	8.50529	-0.51558	0.699512	1.05e-18	4.44e-17	DOWN
BBS12	6.61492	6.99831	-0.383385	0.766637	6e-10	3.76e-09	DOWN
BBS1	9.29694	9.7899	-0.492969	0.710561	9.91e-13	1.06e-11	DOWN
BBS4	8.34808	8.72054	-0.372463	0.772463	2.1e-07	8.73e-07	DOWN
BBS9	7.72945	8.09217	-0.362713	0.777701	2.76e-12	2.7e-11	DOWN
BBX	10.1136	10.612	-0.498462	0.707861	3.38e-15	5.94e-14	DOWN
BCAS1	7.10898	8.16646	-1.05748	0.48047	8.07e-05	0.000218248	DOWN
BCL2	9.49921	10.3778	-0.878571	0.543906	1.06e-09	6.39e-09	DOWN
BCLAF1	11.5084	11.8772	-0.368807	0.774423	3.36e-17	9.74e-16	DOWN
BCOR	9.70515	10.1517	-0.446595	0.733773	1.53e-12	1.57e-11	DOWN
BDP1	9.21739	9.84176	-0.624371	0.648702	5.33e-18	1.9e-16	DOWN
BHLHB9	6.73402	7.05704	-0.323025	0.799392	1.74e-06	6.22e-06	DOWN
BHLHE40	12.5156	13.0414	-0.525755	0.694595	1.02e-08	5.22e-08	DOWN
BHMT2	4.78483	5.45263	-0.667799	0.629466	1.58e-07	6.67e-07	DOWN
BICC1	5.49445	6.62531	-1.13086	0.456642	4.22e-11	3.26e-10	DOWN
BIRC6	10.7797	11.1846	-0.404845	0.755317	3.8e-12	3.62e-11	DOWN
BLZF1	9.19778	9.57591	-0.378134	0.769432	1.75e-12	1.78e-11	DOWN
BMI1	10.6201	11.0888	-0.468709	0.722611	1.41e-10	9.94e-10	DOWN
BMP2K	7.85361	8.50792	-0.654312	0.635379	1.44e-14	2.2e-13	DOWN
BMP4	6.56099	7.34227	-0.781286	0.581848	2.32e-07	9.6e-07	DOWN
BMPR1A	8.71708	9.18407	-0.466984	0.723475	2.48e-16	5.73e-15	DOWN
BMPR1B	7.61416	9.14205	-1.52789	0.346785	2.04e-07	8.49e-07	DOWN
BMPR2	10.807	11.4163	-0.609272	0.655527	1.09e-22	1.84e-20	DOWN
BMX	2.98938	3.651	-0.661614	0.632171	5.57e-06	1.82e-05	DOWN
BNC2	7.13102	7.82646	-0.695444	0.617519	1.51e-09	8.84e-09	DOWN
BNIP3L	10.8816	11.3399	-0.458283	0.727852	5.47e-14	7.5e-13	DOWN
BPTF	10.6658	11.0875	-0.421709	0.74654	2.82e-10	1.88e-09	DOWN
BRWD1	10.4383	10.8549	-0.416592	0.749192	3.41e-14	4.85e-13	DOWN
BRWD3	7.25287	7.85721	-0.604335	0.657774	8.39e-10	5.14e-09	DOWN
BSN	4.97281	5.42674	-0.453929	0.730052	2.99e-05	8.67e-05	DOWN
BTAF1	9.25045	9.60772	-0.357266	0.780642	4.16e-07	1.65e-06	DOWN
BTBD7	9.20815	9.74688	-0.538728	0.688377	1.11e-23	2.73e-21	DOWN
BTBD8	2.20388	3.06714	-0.86326	0.549709	3.39e-13	3.95e-12	DOWN
BTD	8.60935	8.93825	-0.328891	0.796148	7.65e-08	3.41e-07	DOWN
BTG2	11.4792	12.0021	-0.522881	0.69598	1.3e-06	4.77e-06	DOWN
BTRC	9.39525	9.8701	-0.474852	0.719541	1.79e-14	2.68e-13	DOWN
BVES	5.41313	5.83189	-0.418761	0.748067	5.67e-05	0.000156916	DOWN
C1QTNF3	7.88162	8.43723	-0.555605	0.680371	8.03e-05	0.0002172	DOWN
C1QTNF7	3.7368	4.78801	-1.0512	0.482566	8.85e-12	7.79e-11	DOWN
C4A	13.3053	13.9778	-0.672547	0.627398	0.000135691	0.000353524	DOWN
C5	6.47613	7.0568	-0.580669	0.668654	1.94e-10	1.33e-09	DOWN
C6	2.76054	3.62727	-0.86673	0.548388	1.84e-05	5.54e-05	DOWN
C7	6.05203	7.01944	-0.967411	0.511423	7.24e-05	0.000197133	DOWN
CA12	10.8862	12.3309	-1.44463	0.367386	2.79e-11	2.24e-10	DOWN
CA5B	7.64245	7.96996	-0.32751	0.796911	1.22e-06	4.5e-06	DOWN
CAB39L	8.91023	9.23755	-0.327315	0.797018	0.000325921	0.000794086	DOWN
CABP4	3.51433	4.08482	-0.570496	0.673385	9.65e-05	0.000257778	DOWN
CACHD1	7.41396	7.83144	-0.417481	0.748731	0.000124893	0.000327274	DOWN
CACNA1C	7.42723	7.8047	-0.377468	0.769788	0.000277698	0.000683659	DOWN
CACNA1D	7.02049	8.12074	-1.10025	0.466437	2.71e-12	2.66e-11	DOWN
CACNA2D1	3.67117	5.31914	-1.64797	0.319088	1.96e-18	7.74e-17	DOWN
CACNA2D2	6.71194	7.69433	-0.982387	0.506142	1.31e-08	6.6e-08	DOWN
CADM2	2.73932	3.47637	-0.737044	0.599967	2.76e-06	9.52e-06	DOWN
CADPS2	9.15058	9.76381	-0.61323	0.653731	1.19e-06	4.39e-06	DOWN
CALCR	1.91389	2.37779	-0.4639	0.725024	0.00013799	0.000358862	DOWN
CALCRL	8.27142	9.06347	-0.792051	0.577523	2.78e-14	4.05e-13	DOWN
CANX	13.8036	14.1528	-0.349232	0.785002	6.64e-13	7.32e-12	DOWN
CAPN13	7.46955	8.47802	-1.00847	0.497073	0.000159162	0.000408369	DOWN
CAPN7	9.38318	9.73352	-0.350332	0.784404	7.03e-14	9.4e-13	DOWN
CAPN8	5.81087	7.00348	-1.19261	0.437511	2.11e-05	6.27e-05	DOWN
CAPRIN1	12.6595	12.9964	-0.33691	0.791735	5.24e-13	5.87e-12	DOWN
CAPS2	4.38037	4.93402	-0.553644	0.681297	1.94e-08	9.49e-08	DOWN
CASC1	4.16081	5.14518	-0.984376	0.505444	1.85e-10	1.27e-09	DOWN
CASC2	5.16147	5.65821	-0.496743	0.708705	2.86e-10	1.9e-09	DOWN
CASC4	10.9553	11.4425	-0.487248	0.713384	1.27e-16	3.14e-15	DOWN
CASD1	9.16098	9.85079	-0.689804	0.619938	4.15e-16	9.08e-15	DOWN
CASP8AP2	8.48971	8.91264	-0.422938	0.745904	1.6e-06	5.76e-06	DOWN
CASQ1	2.78997	3.68188	-0.891914	0.538899	2.29e-09	1.3e-08	DOWN
CASQ2	3.51137	4.34585	-0.834488	0.560782	7.12e-09	3.74e-08	DOWN
CAST	11.7331	12.0625	-0.329433	0.795849	2.03e-12	2.04e-11	DOWN
CAV1	10.0242	10.4139	-0.389764	0.763254	2.97e-05	8.62e-05	DOWN
CBL	9.21775	9.66306	-0.445311	0.734426	1.27e-11	1.09e-10	DOWN
CBLN1	2.30404	2.9504	-0.646362	0.638889	5.93e-06	1.93e-05	DOWN
CBLN4	2.93043	3.68636	-0.755928	0.592165	5.28e-08	2.41e-07	DOWN
CBX5	11.3591	11.6977	-0.33862	0.790797	6.04e-10	3.78e-09	DOWN
CC2D2A	7.46521	7.87455	-0.409335	0.75297	6.8e-10	4.23e-09	DOWN
CCBE1	2.76008	3.26022	-0.500146	0.707035	0.00024555	0.00060966	DOWN
CCDC110	5.23774	5.59533	-0.357592	0.780466	6.28e-05	0.000172577	DOWN
CCDC113	7.78382	8.14783	-0.364011	0.777001	5.04e-06	1.66e-05	DOWN
CCDC121	6.47716	6.8275	-0.350342	0.784398	3.83e-11	2.98e-10	DOWN
CCDC122	5.27286	5.75967	-0.486814	0.713599	3.03e-11	2.41e-10	DOWN
CCDC125	8.74353	9.10524	-0.361707	0.778243	4.81e-05	0.000134983	DOWN
CCDC126	7.35709	7.85059	-0.493497	0.710301	1.69e-11	1.41e-10	DOWN
CCDC144A	3.11212	3.97947	-0.867355	0.548151	4.12e-09	2.24e-08	DOWN
CCDC146	6.55687	6.94276	-0.385882	0.765311	1.5e-06	5.43e-06	DOWN
CCDC148	3.67209	4.11593	-0.44384	0.735175	1.25e-05	3.87e-05	DOWN
CCDC15	5.73657	6.29238	-0.555812	0.680274	1.04e-08	5.32e-08	DOWN
CCDC158	2.39448	3.39633	-1.00184	0.499361	2.8e-11	2.24e-10	DOWN
CCDC160	4.49344	5.54197	-1.04853	0.48346	2.49e-10	1.67e-09	DOWN
CCDC30	5.96746	6.63456	-0.6671	0.629771	1.61e-12	1.65e-11	DOWN
CCDC36	2.93468	3.27372	-0.339034	0.790571	0.000169775	0.000433466	DOWN
CCDC39	3.80577	4.36451	-0.558743	0.678894	2.01e-06	7.1e-06	DOWN
CCDC65	3.41814	3.95439	-0.536242	0.689565	0.00030202	0.000739833	DOWN
CCDC80	10.8375	11.3524	-0.514839	0.699871	5.16e-05	0.00014396	DOWN
CCDC85A	4.83143	5.34207	-0.51064	0.701911	2.42e-06	8.42e-06	DOWN
CCDC91	8.65238	9.01522	-0.362833	0.777636	7.21e-12	6.44e-11	DOWN
CCKAR	0.433137	0.827705	-0.394568	0.760717	9.48e-07	3.56e-06	DOWN
CCL14	6.39973	7.18379	-0.784059	0.580731	1.08e-05	3.38e-05	DOWN
CCNG1	10.2904	10.7617	-0.471346	0.721291	3.77e-17	1.08e-15	DOWN
CCNG2	10.6642	11.1855	-0.52134	0.696724	5.96e-10	3.73e-09	DOWN
CCNI	11.8387	12.3929	-0.554217	0.681027	1.8e-19	9.74e-18	DOWN
CCNT1	5.93932	7.11768	-1.17836	0.441854	1.08e-18	4.56e-17	DOWN
CCNT2	9.18708	9.52717	-0.340083	0.789996	3.57e-09	1.96e-08	DOWN
CCPG1	10.4915	10.9474	-0.455926	0.729042	6.66e-15	1.1e-13	DOWN
CD164	12.8704	13.2424	-0.372022	0.772699	2.88e-11	2.3e-10	DOWN
CD2AP	10.4483	10.8077	-0.359377	0.779501	1.54e-09	9.01e-09	DOWN
CD300C	4.54667	4.96199	-0.415325	0.749851	1.91e-05	5.73e-05	DOWN
CD302	8.85849	9.52847	-0.669984	0.628514	9.06e-18	3e-16	DOWN
CD36	8.67093	9.54374	-0.872809	0.546083	5.04e-06	1.66e-05	DOWN
CD46	12.3077	12.7907	-0.483056	0.71546	1.53e-13	1.9e-12	DOWN
CD93	10.2787	10.823	-0.544257	0.685744	5.17e-10	3.28e-09	DOWN
CDC14A	6.89602	7.30961	-0.41359	0.750753	7.33e-05	0.000199489	DOWN
CDC14B	7.26388	7.67467	-0.410795	0.752209	3.8e-07	1.52e-06	DOWN
CDC27	10.2267	10.555	-0.328351	0.796447	5.83e-14	7.95e-13	DOWN
CDH11	10.2777	10.9646	-0.686928	0.621175	3.58e-08	1.68e-07	DOWN
CDH13	7.68604	8.1076	-0.421557	0.746618	6.6e-07	2.54e-06	DOWN
CDH5	9.28972	9.73039	-0.440675	0.73679	2.63e-06	9.11e-06	DOWN
CDH6	5.11927	5.93669	-0.817422	0.567455	4.67e-16	1.01e-14	DOWN
CDH7	1.1816	1.97791	-0.796307	0.575821	1.84e-06	6.56e-06	DOWN
CDH8	1.90126	2.48185	-0.580592	0.668689	1.21e-09	7.19e-09	DOWN
CDK14	8.62308	9.17082	-0.547733	0.684094	1.12e-09	6.7e-09	DOWN
CDK15	1.35242	2.02924	-0.676821	0.625542	2.27e-10	1.54e-09	DOWN
CDK17	9.13017	9.65606	-0.525896	0.694528	1.92e-15	3.65e-14	DOWN
CDKL5	4.17797	5.18622	-1.00824	0.497151	2.67e-10	1.78e-09	DOWN
CDO1	5.10169	5.7136	-0.611909	0.65433	6.7e-05	0.000183358	DOWN
CDON	8.38613	8.96527	-0.57914	0.669363	3.36e-07	1.36e-06	DOWN
CDR1	2.73215	3.227	-0.494856	0.709632	0.000270565	0.000667626	DOWN
CDS1	9.68087	10.0935	-0.412603	0.751267	1.26e-11	1.08e-10	DOWN
CDYL2	5.75529	6.65691	-0.901613	0.535288	2.27e-13	2.73e-12	DOWN
CEACAM5	5.36968	6.78088	-1.4112	0.375999	2.66e-06	9.2e-06	DOWN
CELSR1	11.0316	11.8117	-0.780103	0.582325	5.23e-11	3.98e-10	DOWN
CEP120	8.50579	8.97587	-0.470086	0.721922	6.71e-17	1.79e-15	DOWN
CEP170	9.52117	9.91372	-0.392545	0.761785	1.07e-07	4.65e-07	DOWN
CEP290	8.44782	8.88981	-0.441989	0.736119	5.31e-10	3.36e-09	DOWN
CEP350	10.322	10.7945	-0.472478	0.720726	7.14e-16	1.49e-14	DOWN
CEP97	6.80711	7.48152	-0.674408	0.626589	3.78e-15	6.58e-14	DOWN
CES1	5.98419	6.88938	-0.905193	0.533961	1.15e-07	4.97e-07	DOWN
CFH	9.46891	9.96837	-0.499461	0.707371	5.97e-07	2.31e-06	DOWN
CFHR3	1.02076	1.46403	-0.443267	0.735467	8.82e-09	4.56e-08	DOWN
CFI	7.62619	8.05379	-0.427595	0.7435	1.99e-05	5.95e-05	DOWN
CGNL1	9.0164	9.44684	-0.430435	0.742038	0.000152079	0.000392125	DOWN
CHAD	6.22619	7.51462	-1.28843	0.409395	2.57e-06	8.92e-06	DOWN
CHD1	9.65638	10.222	-0.565667	0.675643	1.13e-18	4.72e-17	DOWN
CHD6	10.2127	10.7288	-0.516056	0.699281	1.51e-11	1.27e-10	DOWN
CHD9	9.29783	9.85064	-0.552815	0.681689	1.54e-15	2.97e-14	DOWN
CHIC1	7.50514	7.95638	-0.451243	0.731412	2.22e-12	2.22e-11	DOWN
CHL1	5.32233	6.43063	-1.1083	0.463839	6.24e-11	4.67e-10	DOWN
CHM	8.48849	9.04532	-0.556826	0.679796	6.6e-19	2.98e-17	DOWN
CHN2	5.93454	6.69028	-0.755747	0.59224	6.58e-10	4.1e-09	DOWN
CHRD	7.541	8.0922	-0.551198	0.682453	0.000292855	0.000718405	DOWN
CHRM4	1.74312	2.13703	-0.393906	0.761066	2.67e-05	7.81e-05	DOWN
CHRNA6	2.44444	3.19357	-0.749134	0.594961	6.57e-08	2.95e-07	DOWN
CHST15	9.94581	10.4009	-0.455071	0.729474	3.23e-08	1.53e-07	DOWN
CHSY3	6.11646	6.51848	-0.402024	0.756796	8.15e-05	0.000220204	DOWN
CISH	9.53651	9.86999	-0.33348	0.79362	0.000406462	0.000974184	DOWN
CLASP2	9.60351	10.0537	-0.45019	0.731946	2.57e-16	5.9e-15	DOWN
CLCN3	9.81269	10.4649	-0.652207	0.636306	3.92e-17	1.12e-15	DOWN
CLDN11	6.18354	6.68591	-0.502376	0.705943	0.000187364	0.000474573	DOWN
CLDN12	9.61022	10.0269	-0.416705	0.749134	2.04e-11	1.67e-10	DOWN
CLDN19	1.80547	2.64427	-0.838805	0.559106	9.68e-07	3.63e-06	DOWN
CLGN	6.22619	7.39201	-1.16582	0.445711	1.36e-07	5.82e-07	DOWN
CLIC5	5.94598	6.66842	-0.722445	0.606069	1.26e-10	8.95e-10	DOWN
CLIC6	6.78587	8.17429	-1.38842	0.381983	4.12e-08	1.91e-07	DOWN
CLN5	8.99303	9.32994	-0.336902	0.79174	2.31e-10	1.56e-09	DOWN
CLOCK	7.77335	8.55679	-0.783436	0.580981	1.76e-15	3.38e-14	DOWN
CLSTN2	7.82551	9.31373	-1.48822	0.356451	6.86e-11	5.1e-10	DOWN
CLTC	13.4022	13.7565	-0.354311	0.782243	2.44e-09	1.38e-08	DOWN
CLUL1	5.12041	5.62661	-0.506195	0.704077	0.000106654	0.00028249	DOWN
CMBL	9.34911	10.2385	-0.889358	0.539854	7.25e-07	2.77e-06	DOWN
CMTM1	6.37082	6.69838	-0.32756	0.796883	1.76e-06	6.28e-06	DOWN
CMYA5	7.93766	8.83297	-0.895317	0.537629	1.52e-10	1.06e-09	DOWN
CNIH3	5.77964	6.20248	-0.422844	0.745952	7.51e-06	2.41e-05	DOWN
CNNM4	9.71389	10.0415	-0.327622	0.796849	8.68e-09	4.49e-08	DOWN
CNOT6L	9.71082	10.1905	-0.479727	0.717113	2.59e-20	1.89e-18	DOWN
CNR1	3.83629	4.45941	-0.623115	0.649267	0.000104303	0.000276817	DOWN
CNRIP1	6.87991	7.24404	-0.364126	0.776939	2.86e-05	8.32e-05	DOWN
CNST	9.44901	9.80419	-0.355183	0.781771	4.93e-12	4.57e-11	DOWN
CNTF	2.86611	3.25871	-0.392599	0.761756	3.09e-06	1.06e-05	DOWN
CNTN1	4.96161	6.05688	-1.09527	0.46805	2.17e-08	1.05e-07	DOWN
CNTN3	4.31991	5.0696	-0.749687	0.594733	9.06e-07	3.41e-06	DOWN
CNTN4	5.48429	6.49996	-1.01566	0.494601	3.95e-09	2.15e-08	DOWN
CNTNAP2	6.40389	7.57814	-1.17426	0.443112	2.68e-05	7.84e-05	DOWN
COBLL1	8.68714	9.33217	-0.645032	0.639479	4.88e-15	8.3e-14	DOWN
COG6	8.72609	9.15209	-0.426003	0.744321	4.53e-12	4.24e-11	DOWN
COL12A1	12.3986	13.0614	-0.662845	0.631632	1.88e-06	6.68e-06	DOWN
COL14A1	9.37636	10.4498	-1.07343	0.475188	1.98e-10	1.35e-09	DOWN
COL15A1	10.7417	11.1307	-0.389002	0.763658	0.000273093	0.000673285	DOWN
COL3A1	15.372	16.0043	-0.632336	0.645131	4.02e-06	1.35e-05	DOWN
COL4A5	8.75887	9.37444	-0.615567	0.652674	3.57e-06	1.21e-05	DOWN
COL4A6	4.64069	5.48113	-0.840436	0.558475	3.39e-06	1.15e-05	DOWN
COL5A2	12.3963	12.9579	-0.561568	0.677565	4.83e-06	1.6e-05	DOWN
COL6A3	13.6738	14.2586	-0.584844	0.666721	1.31e-06	4.8e-06	DOWN
COL8A1	8.43588	8.99552	-0.559646	0.678469	0.000217602	0.000545383	DOWN
COLEC12	8.2652	9.02092	-0.755713	0.592253	7.55e-10	4.67e-09	DOWN
COMMD10	8.31982	8.79949	-0.479669	0.717142	4.47e-17	1.25e-15	DOWN
COPB1	11.6333	11.9926	-0.359335	0.779524	6.01e-14	8.18e-13	DOWN
CORIN	5.52416	6.13709	-0.612921	0.653871	0.000245244	0.000608988	DOWN
CORO2A	9.55934	9.91066	-0.351317	0.783868	1.7e-06	6.09e-06	DOWN
CORO2B	5.35251	5.8347	-0.482187	0.715891	1.08e-05	3.38e-05	DOWN
CPA3	6.50422	7.49845	-0.994233	0.502003	3.41e-07	1.38e-06	DOWN
CPA6	2.0201	2.5379	-0.517793	0.69844	2.71e-05	7.92e-05	DOWN
CPB1	4.98112	6.92133	-1.94021	0.260579	6.16e-08	2.78e-07	DOWN
CPD	11.0053	11.6976	-0.692309	0.618863	3.08e-17	8.98e-16	DOWN
CPE	10.2389	10.7121	-0.473265	0.720332	1.33e-05	4.1e-05	DOWN
CPEB1	2.64395	3.25977	-0.615829	0.652555	1.7e-07	7.14e-07	DOWN
CPEB2	8.77363	9.5731	-0.79947	0.57456	8.44e-16	1.73e-14	DOWN
CPEB3	6.72164	7.28988	-0.56824	0.674439	2.22e-15	4.14e-14	DOWN
CPEB4	9.29784	9.94316	-0.645313	0.639354	3.46e-14	4.91e-13	DOWN
CPNE3	11.5602	11.9434	-0.383231	0.766719	4.55e-10	2.92e-09	DOWN
CPS1	4.96546	5.64309	-0.677629	0.625192	1.77e-07	7.42e-07	DOWN
CPSF2	10.1502	10.4747	-0.324497	0.798577	3.37e-15	5.92e-14	DOWN
CPT1A	10.495	10.843	-0.348009	0.785668	3.34e-06	1.13e-05	DOWN
CREB1	9.82445	10.1981	-0.373621	0.771843	3.58e-20	2.44e-18	DOWN
CREB3L1	9.50552	10.0316	-0.526106	0.694426	5.7e-06	1.86e-05	DOWN
CREBBP	11.0677	11.4208	-0.353058	0.782923	5.03e-12	4.65e-11	DOWN
CREBL2	10.165	10.6255	-0.460521	0.726724	1.93e-17	5.91e-16	DOWN
CRIM1	10.4144	11.0497	-0.635277	0.643817	1.01e-11	8.82e-11	DOWN
CRISPLD2	10.0867	10.4859	-0.399205	0.758276	4.97e-05	0.00013911	DOWN
CRK	9.43215	9.77038	-0.338233	0.79101	1.16e-12	1.22e-11	DOWN
CROT	8.57217	9.00225	-0.430084	0.742218	5e-05	0.000139881	DOWN
CRYBG3	6.97773	7.68147	-0.70374	0.613979	1.29e-08	6.51e-08	DOWN
CSNK1G1	9.18322	9.59814	-0.41492	0.750061	3.21e-15	5.69e-14	DOWN
CSNK1G3	9.15423	9.63509	-0.480866	0.716547	1.63e-18	6.52e-17	DOWN
CSRNP2	9.93391	10.266	-0.33207	0.794396	2.23e-10	1.51e-09	DOWN
CSRNP3	1.85828	2.57749	-0.71921	0.60743	2.9e-10	1.92e-09	DOWN
CST1	5.0246	6.70913	-1.68452	0.311106	2.1e-09	1.2e-08	DOWN
CST2	2.75785	4.51892	-1.76107	0.295029	2.1e-19	1.11e-17	DOWN
CST4	2.88551	3.87632	-0.990808	0.503196	2.83e-07	1.16e-06	DOWN
CST5	1.1398	2.48674	-1.34693	0.393127	1.06e-07	4.61e-07	DOWN
CST9	2.72069	3.62576	-0.905065	0.534008	5.96e-05	0.000164466	DOWN
CT62	3.58738	4.6998	-1.11243	0.462515	3.8e-08	1.77e-07	DOWN
CTAGE6	2.56047	3.00135	-0.440882	0.736684	3.67e-06	1.24e-05	DOWN
CTDSPL	9.87891	10.2255	-0.346547	0.786464	4.51e-10	2.9e-09	DOWN
CTDSPL2	9.00932	9.42267	-0.413354	0.750876	6.03e-14	8.2e-13	DOWN
CTH	5.58194	5.9133	-0.331362	0.794786	1.2e-05	3.72e-05	DOWN
CTNND1	12.6014	12.9521	-0.350655	0.784228	3.82e-11	2.98e-10	DOWN
CTR9	10.2847	10.6607	-0.376012	0.770565	4.99e-14	6.89e-13	DOWN
CTSO	9.61133	10.0013	-0.390003	0.763128	7.55e-10	4.67e-09	DOWN
CTTNBP2	4.53106	5.47008	-0.939012	0.52159	1.45e-09	8.51e-09	DOWN
CWF19L2	8.12093	8.5469	-0.425972	0.744337	1.43e-18	5.83e-17	DOWN
CX3CR1	6.18757	7.24352	-1.05596	0.480978	6.99e-13	7.69e-12	DOWN
CXCL12	10.5297	10.9888	-0.459096	0.727442	7.6e-06	2.43e-05	DOWN
CXCR2	2.64337	3.00513	-0.361759	0.778215	4.93e-05	0.00013808	DOWN
CXXC4	2.90189	3.37169	-0.469802	0.722064	0.000175607	0.000447163	DOWN
CYB5A	10.3397	10.745	-0.405282	0.755088	6.87e-05	0.000187712	DOWN
CYB5RL	5.73474	6.23076	-0.496021	0.709059	7.03e-14	9.4e-13	DOWN
CYBRD1	11.3863	12.2121	-0.82581	0.564165	1.34e-12	1.39e-11	DOWN
CYP2A6	2.41778	3.32989	-0.912116	0.531405	0.000139602	0.000362561	DOWN
CYP2A7	1.14639	1.96221	-0.815815	0.568087	3.5e-06	1.18e-05	DOWN
CYP2B6	1.3665	1.88299	-0.516498	0.699067	1.1e-05	3.43e-05	DOWN
CYP2U1	7.05258	7.58129	-0.52871	0.693174	8.5e-13	9.19e-12	DOWN
CYP4B1	6.19243	7.28121	-1.08878	0.470159	8.01e-06	2.55e-05	DOWN
CYP4V2	8.70473	9.13507	-0.430342	0.742086	2.21e-08	1.07e-07	DOWN
CYP4X1	7.33208	8.50914	-1.17707	0.44225	6.06e-07	2.35e-06	DOWN
CYP4Z1	5.12659	6.89278	-1.76619	0.293984	2.43e-07	1e-06	DOWN
CYP4Z2P	5.01638	6.47002	-1.45364	0.365099	6.46e-07	2.49e-06	DOWN
CYSLTR1	4.82472	5.56231	-0.73759	0.59974	4.05e-08	1.88e-07	DOWN
CYSLTR2	2.99923	3.53569	-0.53646	0.689461	6.19e-05	0.000170321	DOWN
CYTL1	3.48335	4.05688	-0.573522	0.671974	1.41e-05	4.33e-05	DOWN
DAAM1	8.64729	9.26238	-0.615092	0.652888	3.03e-11	2.41e-10	DOWN
DAB1	1.01158	1.52496	-0.513376	0.700581	2.86e-05	8.32e-05	DOWN
DAB2	10.045	10.4706	-0.425597	0.744531	1.78e-08	8.77e-08	DOWN
DACH1	6.76782	8.23106	-1.46325	0.362676	9.79e-11	7.1e-10	DOWN
DACT1	7.60328	8.10774	-0.504457	0.704926	0.000108344	0.000286658	DOWN
DBX2	1.54183	2.01857	-0.476749	0.718595	9.25e-06	2.92e-05	DOWN
DCAF10	10.4158	11.019	-0.603189	0.658297	1.8e-14	2.69e-13	DOWN
DCAF16	9.36946	9.71513	-0.345669	0.786943	7.62e-08	3.39e-07	DOWN
DCAF17	8.50527	8.83716	-0.331898	0.79449	1.12e-11	9.72e-11	DOWN
DCDC1	1.69086	2.56794	-0.877083	0.544467	3.2e-12	3.08e-11	DOWN
DCDC2	4.88529	5.89512	-1.00982	0.496608	3.61e-06	1.22e-05	DOWN
DCLK1	7.50516	8.70673	-1.20156	0.434804	9.88e-14	1.28e-12	DOWN
DCN	12.4879	13.183	-0.695037	0.617693	5.89e-06	1.92e-05	DOWN
DCP1A	9.08043	9.42475	-0.344324	0.787677	8.79e-16	1.79e-14	DOWN
DCP2	9.65709	10.0191	-0.361985	0.778093	2.64e-13	3.14e-12	DOWN
DCTN4	10.5039	10.9973	-0.493326	0.710385	2.74e-21	2.58e-19	DOWN
DCUN1D1	8.89948	9.23053	-0.331048	0.794959	3.78e-08	1.76e-07	DOWN
DCUN1D3	7.18875	7.52566	-0.336916	0.791732	8.26e-14	1.09e-12	DOWN
DDAH1	9.96672	10.4389	-0.472135	0.720897	4.98e-10	3.17e-09	DOWN
DDI2	5.68393	6.68642	-1.0025	0.499135	9.32e-15	1.49e-13	DOWN
DDR2	6.56851	7.35603	-0.78752	0.579339	1.79e-09	1.04e-08	DOWN
DDX11L2	3.1321	3.78268	-0.650576	0.637026	6.13e-07	2.37e-06	DOWN
DDX21	10.4352	10.8062	-0.37101	0.773241	0.000128677	0.000336421	DOWN
DDX6	11.3849	11.8343	-0.449365	0.732365	1.91e-22	2.83e-20	DOWN
DEFB132	1.85554	2.50002	-0.64448	0.639723	1.7e-05	5.15e-05	DOWN
DEGS2	8.49032	9.46216	-0.971835	0.509857	7.42e-05	0.00020181	DOWN
DENND1B	6.49355	7.39	-0.896451	0.537206	3.33e-13	3.89e-12	DOWN
DENND4A	8.27272	8.83315	-0.560432	0.678099	1.24e-15	2.47e-14	DOWN
DENND4C	9.79493	10.3449	-0.549966	0.683036	2.66e-20	1.92e-18	DOWN
DENND5B	7.33434	7.86129	-0.526946	0.694022	1.19e-08	6.03e-08	DOWN
DGKH	4.93395	5.45303	-0.519077	0.697818	2.38e-07	9.83e-07	DOWN
DGKI	2.70544	3.39873	-0.693295	0.61844	4.77e-12	4.44e-11	DOWN
DHCR24	13.2034	13.657	-0.453598	0.73022	0.000173827	0.000442892	DOWN
DHX29	9.8243	10.2263	-0.402015	0.7568	2.19e-15	4.09e-14	DOWN
DHX33	7.72398	8.18448	-0.460496	0.726737	1.54e-05	4.7e-05	DOWN
DHX40	10.2649	10.652	-0.387152	0.764638	8.65e-11	6.32e-10	DOWN
DICER1	10.27	10.7667	-0.496796	0.708679	2.97e-15	5.3e-14	DOWN
DIO2	8.07712	8.67204	-0.594921	0.662081	4.28e-05	0.000120977	DOWN
DIP2B	10.1543	10.6189	-0.464646	0.724649	3.13e-15	5.56e-14	DOWN
DISP2	4.63117	5.44694	-0.815764	0.568108	5.43e-09	2.9e-08	DOWN
DIXDC1	8.52184	9.30508	-0.78324	0.581061	2.24e-22	3.16e-20	DOWN
DKK2	5.28943	6.05546	-0.766032	0.588033	1.89e-08	9.26e-08	DOWN
DLG2	4.37975	4.84242	-0.462673	0.725641	0.0001513	0.000390233	DOWN
DLG5	11.1615	11.51	-0.348471	0.785416	2.77e-06	9.55e-06	DOWN
DMGDH	3.44428	4.05619	-0.61191	0.65433	5.71e-09	3.04e-08	DOWN
DMXL1	9.1198	9.76888	-0.649082	0.637686	2.55e-18	9.82e-17	DOWN
DMXL2	8.63713	9.07377	-0.436642	0.738852	2.46e-09	1.39e-08	DOWN
DNAH5	6.53466	7.7032	-1.16855	0.44487	3.04e-12	2.94e-11	DOWN
DNAH7	4.20699	5.33546	-1.12847	0.457401	2.72e-14	3.99e-13	DOWN
DNAH9	2.30111	2.85901	-0.557906	0.679288	3.43e-05	9.83e-05	DOWN
DNAJB14	7.77561	8.38016	-0.604557	0.657673	1.3e-19	7.31e-18	DOWN
DNAJB4	7.88322	8.26623	-0.383019	0.766831	1.51e-07	6.41e-07	DOWN
DNAJC12	7.65736	8.69495	-1.03759	0.487141	1.42e-06	5.17e-06	DOWN
DNAJC13	10.187	10.5461	-0.359041	0.779683	1.72e-13	2.12e-12	DOWN
DNAJC16	9.1134	9.63249	-0.51909	0.697812	9.37e-22	1.05e-19	DOWN
DNAJC22	5.79224	6.54206	-0.749819	0.594678	8.34e-08	3.69e-07	DOWN
DNAJC3	10.6795	11.1667	-0.487259	0.713379	3.82e-18	1.4e-16	DOWN
DNAL1	8.21909	8.78841	-0.56932	0.673934	2.02e-16	4.76e-15	DOWN
DNMBP	8.7803	9.23821	-0.457913	0.728039	4.24e-06	1.42e-05	DOWN
DOC2B	2.91292	3.59998	-0.687058	0.621119	1.01e-05	3.17e-05	DOWN
DOCK10	8.30704	8.87134	-0.564297	0.676285	1.02e-06	3.81e-06	DOWN
DOCK11	7.75936	8.22011	-0.460751	0.726608	2.09e-05	6.22e-05	DOWN
DOCK4	8.05615	8.45864	-0.402494	0.756549	1.53e-06	5.53e-06	DOWN
DOCK5	7.81481	8.29269	-0.47788	0.718032	2.59e-06	8.98e-06	DOWN
DOCK9	9.85022	10.4091	-0.558919	0.67881	5.2e-15	8.81e-14	DOWN
DOK6	4.37589	5.14653	-0.770644	0.586156	6.06e-12	5.53e-11	DOWN
DPP4	6.63889	7.20826	-0.569376	0.673908	3.81e-06	1.28e-05	DOWN
DPP8	7.90573	8.68087	-0.775133	0.584335	1.09e-17	3.54e-16	DOWN
DPY19L3	7.98096	8.76599	-0.785027	0.580341	2.83e-15	5.09e-14	DOWN
DPYD	7.96405	8.58492	-0.620863	0.650282	2.95e-10	1.96e-09	DOWN
DRD1	1.3184	1.82535	-0.506947	0.70371	3.71e-05	0.000105804	DOWN
DSC1	1.78419	2.37527	-0.591085	0.663843	1.85e-06	6.59e-06	DOWN
DSEL	7.23695	7.80625	-0.569305	0.673942	3.56e-08	1.67e-07	DOWN
DSG2	11.2101	11.6775	-0.467375	0.723279	1.08e-05	3.38e-05	DOWN
DST	11.0104	11.6707	-0.660313	0.632741	1.88e-11	1.55e-10	DOWN
DTWD2	7.08767	7.78696	-0.699293	0.615874	2.25e-19	1.17e-17	DOWN
DUSP16	10.5955	10.9702	-0.374722	0.771254	4.31e-07	1.7e-06	DOWN
DUSP18	6.55234	7.00276	-0.450418	0.731831	8.99e-18	3e-16	DOWN
DUSP19	5.62129	5.9842	-0.36291	0.777594	2.35e-09	1.33e-08	DOWN
DUSP4	8.83039	9.63184	-0.801452	0.573771	1.05e-07	4.57e-07	DOWN
DUSP6	9.76146	10.1646	-0.40311	0.756226	5.55e-05	0.000153793	DOWN
DYNC1I2	10.6675	11.0482	-0.380643	0.768095	5.23e-15	8.85e-14	DOWN
DYNC2H1	7.37822	8.53892	-1.16071	0.447293	1.82e-26	1.74e-23	DOWN
DYNLT3	9.31801	9.73163	-0.413618	0.750739	4.86e-13	5.48e-12	DOWN
DZIP3	8.48137	8.80493	-0.323556	0.799098	9.01e-08	3.96e-07	DOWN
EAF1	9.57331	9.98749	-0.41418	0.750446	4.04e-14	5.66e-13	DOWN
EBF1	6.93872	7.44149	-0.502774	0.705749	1.2e-06	4.43e-06	DOWN
EBF2	3.05198	3.86963	-0.817654	0.567364	5.5e-10	3.47e-09	DOWN
EBF3	5.43026	5.83157	-0.401308	0.757171	0.000170317	0.000434721	DOWN
ECM2	7.83675	8.4902	-0.653443	0.635761	5.38e-08	2.45e-07	DOWN
ECT2L	3.29437	3.63468	-0.34031	0.789872	0.000148698	0.000384097	DOWN
EDA2R	5.35161	5.99044	-0.638828	0.642234	9.21e-09	4.75e-08	DOWN
EDEM1	10.4127	10.7433	-0.330609	0.795201	6e-08	2.71e-07	DOWN
EDEM3	10.2609	10.8965	-0.635519	0.643709	6.22e-19	2.84e-17	DOWN
EDIL3	6.08516	7.5173	-1.43214	0.37058	6.19e-12	5.63e-11	DOWN
EDNRA	8.48995	9.14403	-0.654083	0.635479	1.82e-10	1.25e-09	DOWN
EDNRB	6.85022	7.50251	-0.652292	0.636269	2.42e-08	1.17e-07	DOWN
EEA1	8.94344	9.55217	-0.608734	0.655772	3.5e-21	3.17e-19	DOWN
EFCAB6	4.53669	5.17186	-0.635173	0.643864	4.06e-07	1.61e-06	DOWN
EFHB	2.18158	2.65602	-0.474438	0.719747	1.85e-05	5.56e-05	DOWN
EFHC2	3.90205	4.50609	-0.604036	0.657911	1.7e-05	5.15e-05	DOWN
EFR3A	10.7975	11.2415	-0.444039	0.735074	5.5e-13	6.13e-12	DOWN
EGOT	3.18657	3.75765	-0.571081	0.673112	0.000103825	0.000275761	DOWN
EGR3	7.73083	8.35188	-0.621058	0.650194	5.26e-05	0.000146512	DOWN
EHF	9.41259	10.1796	-0.766983	0.587645	3.8e-06	1.28e-05	DOWN
EHHADH	7.33804	7.7531	-0.415056	0.749991	8.64e-08	3.81e-07	DOWN
EIF2AK3	9.54354	9.97068	-0.427141	0.743734	1.17e-15	2.33e-14	DOWN
EIF4E3	8.98883	9.51264	-0.523816	0.69553	9.16e-17	2.34e-15	DOWN
EIF4G3	10.3691	10.8002	-0.431123	0.741684	1.15e-15	2.3e-14	DOWN
ELF1	10.2406	10.7164	-0.475786	0.719075	1.73e-12	1.76e-11	DOWN
ELF2	9.36352	9.68735	-0.323828	0.798947	6.26e-12	5.68e-11	DOWN
ELK3	8.0786	8.74642	-0.667818	0.629458	1.12e-11	9.72e-11	DOWN
ELK4	6.90765	7.3184	-0.410751	0.752232	6.44e-08	2.9e-07	DOWN
ELL2	9.65543	10.073	-0.417537	0.748702	1.55e-07	6.56e-07	DOWN
ELMOD2	7.53089	8.02257	-0.491674	0.7112	5.5e-15	9.27e-14	DOWN
ELOVL2	6.9298	7.87504	-0.945238	0.519344	0.000209013	0.000525387	DOWN
ELOVL5	11.8527	12.5851	-0.732413	0.601896	2.29e-12	2.28e-11	DOWN
ELP2	10.8496	11.2117	-0.362121	0.77802	1.15e-06	4.26e-06	DOWN
EMCN	7.54813	8.10047	-0.552349	0.681909	1.9e-07	7.95e-07	DOWN
EML1	7.9127	8.23947	-0.326777	0.797316	3.69e-05	0.000105269	DOWN
EMP2	11.9177	12.2809	-0.363233	0.77742	1.31e-06	4.8e-06	DOWN
ENC1	10.1863	10.5318	-0.34548	0.787046	3.32e-06	1.13e-05	DOWN
ENDOU	1.99683	2.36652	-0.369689	0.773949	4.25e-05	0.000120189	DOWN
ENOX1	5.50313	6.01483	-0.511705	0.701393	2.22e-05	6.58e-05	DOWN
ENPEP	7.1151	7.55324	-0.438137	0.738087	4.53e-05	0.000127583	DOWN
ENPP1	9.76164	10.4535	-0.691879	0.619047	7.56e-07	2.88e-06	DOWN
ENPP4	8.30347	9.04764	-0.744173	0.59701	4.35e-14	6.06e-13	DOWN
ENPP5	8.56906	9.42776	-0.858695	0.551451	2.42e-10	1.63e-09	DOWN
ENTPD3	5.15392	6.08645	-0.932529	0.523939	3.15e-10	2.08e-09	DOWN
ENTPD4	8.43597	8.82689	-0.390922	0.762642	3.05e-09	1.69e-08	DOWN
ENTPD5	7.24084	8.07618	-0.835346	0.560449	1.09e-16	2.75e-15	DOWN
ENTPD7	8.48001	8.97895	-0.498943	0.707625	4.65e-13	5.27e-12	DOWN
EP300	10.7505	11.2309	-0.480388	0.716785	5.24e-13	5.87e-12	DOWN
EPAS1	11.0979	11.4473	-0.349364	0.78493	3.36e-05	9.65e-05	DOWN
EPB41L4A	8.24596	8.83233	-0.586368	0.666017	2.18e-09	1.24e-08	DOWN
EPB41L5	8.63265	9.21843	-0.585782	0.666288	1.59e-12	1.63e-11	DOWN
EPC1	8.42825	8.91093	-0.482674	0.71565	7.85e-12	6.96e-11	DOWN
EPC2	8.89223	9.25228	-0.360048	0.779138	3.16e-14	4.53e-13	DOWN
EPHA3	5.13403	6.1084	-0.974372	0.508961	2.78e-11	2.23e-10	DOWN
EPM2AIP1	9.46712	9.91086	-0.443743	0.735224	5.62e-12	5.16e-11	DOWN
EPS8	9.42497	9.96376	-0.538798	0.688344	1.61e-10	1.12e-09	DOWN
ERBB3	12.2819	12.6508	-0.368862	0.774393	3.2e-08	1.51e-07	DOWN
ERBB4	6.77205	8.7566	-1.98455	0.252691	5.16e-12	4.76e-11	DOWN
ERCC4	7.93176	8.44474	-0.512979	0.700774	4.41e-17	1.23e-15	DOWN
ERCC6	8.00315	8.3562	-0.353051	0.782926	2.5e-09	1.4e-08	DOWN
ERG	7.59221	8.13079	-0.538572	0.688452	1.8e-08	8.86e-08	DOWN
ERGIC1	12.2861	12.6847	-0.398615	0.758586	1.33e-08	6.69e-08	DOWN
ERI2	8.61264	8.95959	-0.346951	0.786244	2.18e-09	1.24e-08	DOWN
ERMP1	10.549	11.1612	-0.612186	0.654205	1.4e-14	2.15e-13	DOWN
ERN1	6.57619	7.24679	-0.670603	0.628244	6.94e-08	3.11e-07	DOWN
ESR1	10.0143	11.9895	-1.97519	0.254336	1.1e-10	7.89e-10	DOWN
ESRRG	5.67	6.5926	-0.922593	0.52756	2.1e-08	1.02e-07	DOWN
ETNK1	10.2041	10.5665	-0.362471	0.777831	3.07e-10	2.03e-09	DOWN
ETV1	7.06647	7.74493	-0.678459	0.624832	9.43e-11	6.86e-10	DOWN
ETV3	7.26579	7.83843	-0.572645	0.672383	4.62e-06	1.54e-05	DOWN
EVC	8.66858	9.14235	-0.473774	0.720079	5.82e-08	2.64e-07	DOWN
EVI2A	7.49064	7.86628	-0.375637	0.770765	0.000250342	0.000620394	DOWN
EVI5	8.14422	8.52088	-0.37666	0.770219	9.74e-13	1.04e-11	DOWN
EXD2	9.29857	9.69694	-0.398376	0.758712	3.2e-13	3.75e-12	DOWN
EXOC5	10.0495	10.38	-0.330475	0.795275	3.97e-12	3.77e-11	DOWN
EXOC6	8.68859	9.3003	-0.611712	0.65442	1.48e-16	3.6e-15	DOWN
EXOC6B	6.26285	7.15441	-0.891552	0.539034	2.54e-16	5.85e-15	DOWN
EXPH5	7.60097	7.93109	-0.330119	0.795471	2.83e-06	9.74e-06	DOWN
EYA3	6.51233	7.02856	-0.516229	0.699197	1.66e-09	9.66e-09	DOWN
EYA4	2.21974	2.84084	-0.6211	0.650175	6.98e-06	2.25e-05	DOWN
EYS	2.95604	3.44967	-0.493629	0.710236	5.88e-13	6.52e-12	DOWN
F13A1	8.68375	9.56904	-0.885294	0.541377	5.24e-08	2.4e-07	DOWN
F2R	9.85915	10.4993	-0.640107	0.641665	3.88e-11	3.02e-10	DOWN
F2RL2	7.59874	8.72015	-1.12141	0.459645	5.82e-10	3.66e-09	DOWN
F7	4.48337	5.84785	-1.36448	0.388375	3.41e-09	1.88e-08	DOWN
F8	8.01425	8.4442	-0.429951	0.742287	1.57e-10	1.09e-09	DOWN
FAIM2	4.94037	5.95894	-1.01858	0.493604	8.17e-09	4.25e-08	DOWN
FAM102B	9.62356	10.1335	-0.509988	0.702229	4.59e-09	2.48e-08	DOWN
FAM106C	1.60825	2.29974	-0.691488	0.619215	3.59e-10	2.35e-09	DOWN
FAM107B	10.5367	10.861	-0.324364	0.798651	1.28e-05	3.95e-05	DOWN
FAM114A1	8.92466	9.5274	-0.60274	0.658502	2.76e-15	4.97e-14	DOWN
FAM114A2	8.43805	8.91422	-0.476172	0.718883	4.19e-23	8.24e-21	DOWN
FAM124B	4.59199	5.05212	-0.460132	0.72692	4.49e-06	1.49e-05	DOWN
FAM126B	8.51361	8.9096	-0.395991	0.759967	5.26e-14	7.23e-13	DOWN
FAM131B	4.99142	5.4423	-0.450878	0.731598	0.000140869	0.000365741	DOWN
FAM135B	2.5719	3.34009	-0.768184	0.587156	1.54e-05	4.7e-05	DOWN
FAM13B	9.14559	9.6719	-0.526307	0.69433	2.89e-16	6.56e-15	DOWN
FAM13C	5.31711	5.78132	-0.464208	0.724869	0.000169992	0.000433956	DOWN
FAM149B1	8.57702	8.90155	-0.324535	0.798556	1.8e-13	2.21e-12	DOWN
FAM151B	4.15739	4.71839	-0.560998	0.677833	6.24e-15	1.04e-13	DOWN
FAM155A	4.77701	5.3923	-0.615287	0.6528	4.78e-05	0.000134206	DOWN
FAM157A	3.28789	3.76594	-0.478049	0.717948	0.000197099	0.000497546	DOWN
FAM160B1	9.06106	9.45315	-0.392093	0.762023	1.7e-14	2.56e-13	DOWN
FAM161B	6.30843	7.08132	-0.772882	0.585247	4.33e-13	4.94e-12	DOWN
FAM168A	7.25838	7.92584	-0.667462	0.629614	7.91e-13	8.6e-12	DOWN
FAM169A	6.22358	6.68235	-0.458767	0.727608	0.000107496	0.000284633	DOWN
FAM171B	7.41441	7.84416	-0.42975	0.74239	8.2e-05	0.000221415	DOWN
FAM172A	8.44731	8.95572	-0.508409	0.702997	9.83e-21	7.76e-19	DOWN
FAM180A	4.88863	5.28706	-0.398429	0.758684	0.000138973	0.000361145	DOWN
FAM184B	2.95039	4.06069	-1.1103	0.463196	1.92e-08	9.4e-08	DOWN
FAM199X	8.96936	9.33012	-0.360765	0.778751	6.49e-12	5.88e-11	DOWN
FAM47E	5.73431	6.37904	-0.644739	0.639609	6.54e-05	0.000179293	DOWN
FAM8A1	9.88716	10.2828	-0.395685	0.760128	4.17e-14	5.83e-13	DOWN
FANCM	6.88799	7.28135	-0.393359	0.761355	8.95e-12	7.88e-11	DOWN
FANK1	6.47898	6.99738	-0.518399	0.698146	3.59e-06	1.21e-05	DOWN
FAP	9.36498	9.8468	-0.481819	0.716074	0.000100536	0.000267562	DOWN
FAT3	3.22706	4.56336	-1.3363	0.396034	2.18e-21	2.14e-19	DOWN
FAT4	6.58108	7.50655	-0.925472	0.526508	1.2e-12	1.26e-11	DOWN
FBN1	11.4847	12.2193	-0.734591	0.600988	6.88e-09	3.62e-08	DOWN
FBXL13	3.31273	3.67456	-0.361836	0.778174	4.46e-06	1.48e-05	DOWN
FBXL16	8.07252	8.7932	-0.720685	0.606809	2.09e-05	6.22e-05	DOWN
FBXL17	8.68797	9.20949	-0.521516	0.69664	1.95e-16	4.61e-15	DOWN
FBXL3	9.76939	10.3083	-0.538904	0.688293	8.32e-17	2.16e-15	DOWN
FBXL5	10.7253	11.2335	-0.50814	0.703128	3.44e-19	1.71e-17	DOWN
FBXL7	8.44898	9.00722	-0.558244	0.679128	2.58e-06	8.95e-06	DOWN
FBXO16	5.45402	5.86391	-0.409886	0.752683	2.65e-05	7.76e-05	DOWN
FBXO21	9.92391	10.2483	-0.324382	0.798641	1.81e-12	1.84e-11	DOWN
FBXO28	10.2043	10.5723	-0.368021	0.774844	1.28e-13	1.63e-12	DOWN
FBXO30	8.45525	8.78273	-0.327481	0.796926	1.58e-07	6.67e-07	DOWN
FBXO3	9.19767	9.59034	-0.392676	0.761715	3.28e-15	5.8e-14	DOWN
FBXO36	6.61415	7.26912	-0.654965	0.635091	1.69e-11	1.41e-10	DOWN
FBXO38	9.2886	9.71531	-0.426715	0.743954	1.28e-15	2.53e-14	DOWN
FBXW11	9.87127	10.215	-0.343753	0.787989	3.98e-15	6.91e-14	DOWN
FCHO2	9.01625	9.53003	-0.513774	0.700388	1.05e-17	3.42e-16	DOWN
FDXACB1	6.35709	6.79783	-0.440748	0.736753	1.77e-12	1.8e-11	DOWN
FEM1B	10.6181	11.0148	-0.396732	0.759577	2.45e-15	4.51e-14	DOWN
FEM1C	9.26122	9.86287	-0.601655	0.658998	5.98e-26	3.68e-23	DOWN
FER	4.89866	5.60249	-0.703829	0.61394	5.79e-16	1.23e-14	DOWN
FGD4	7.52752	8.25503	-0.727514	0.603944	1.86e-22	2.78e-20	DOWN
FGD5	8.51612	8.94172	-0.425596	0.744531	5.84e-07	2.27e-06	DOWN
FGD6	8.81028	9.40054	-0.590262	0.664222	1.11e-09	6.65e-09	DOWN
FGF10	1.97564	3.08009	-1.10445	0.46508	1.33e-09	7.84e-09	DOWN
FGF14	5.98109	6.7573	-0.776215	0.583897	6.14e-08	2.77e-07	DOWN
FGF2	6.37023	7.02881	-0.658585	0.633499	2.1e-06	7.39e-06	DOWN
FHL5	3.55488	4.5094	-0.954519	0.516014	1.06e-14	1.67e-13	DOWN
FICD	5.73909	6.25795	-0.518862	0.697922	5.18e-12	4.78e-11	DOWN
FILIP1	5.46291	6.07058	-0.607669	0.656256	7.11e-11	5.27e-10	DOWN
FILIP1L	8.89998	9.47173	-0.571753	0.672799	1.88e-06	6.68e-06	DOWN
FITM2	5.62044	5.94364	-0.323201	0.799294	3.43e-05	9.83e-05	DOWN
FKBP14	7.33809	7.75945	-0.42136	0.746721	2.04e-07	8.49e-07	DOWN
FKTN	8.70904	9.17001	-0.46097	0.726498	4e-16	8.79e-15	DOWN
FLRT2	6.93372	7.73611	-0.80239	0.573399	3.45e-10	2.26e-09	DOWN
FLRT3	5.20323	6.28588	-1.08265	0.472161	4.53e-08	2.09e-07	DOWN
FLT1	9.39162	9.91741	-0.525791	0.694578	8.95e-11	6.52e-10	DOWN
FMN1	4.93333	6.09113	-1.1578	0.448195	2.63e-15	4.8e-14	DOWN
FMO2	6.85471	7.61947	-0.764763	0.58855	1.87e-05	5.62e-05	DOWN
FMO5	6.57763	7.51293	-0.935298	0.522934	5.3e-09	2.84e-08	DOWN
FMOD	10.1626	11.0202	-0.85759	0.551874	7.34e-12	6.55e-11	DOWN
FNBP1L	10.882	11.2437	-0.361696	0.778249	1.01e-08	5.18e-08	DOWN
FNDC3A	9.86344	10.4274	-0.563972	0.676437	3.48e-18	1.29e-16	DOWN
FNIP1	9.21397	9.79086	-0.576881	0.670412	5.39e-19	2.51e-17	DOWN
FNIP2	7.79877	8.55483	-0.75606	0.592111	7.72e-11	5.68e-10	DOWN
FOXA1	10.1565	11.8287	-1.6722	0.313775	7.2e-12	6.44e-11	DOWN
FOXO1	8.65201	9.07145	-0.419443	0.747713	6.76e-08	3.03e-07	DOWN
FOXP1	10.0738	10.7222	-0.648428	0.637975	5.79e-20	3.72e-18	DOWN
FOXP2	2.74328	3.36299	-0.619712	0.650801	1.56e-06	5.63e-06	DOWN
FREM1	4.40875	5.0222	-0.613451	0.653631	0.00027411	0.000675405	DOWN
FRK	6.13853	6.64594	-0.507406	0.703486	2.37e-06	8.27e-06	DOWN
FRMD4B	8.20883	8.8146	-0.605776	0.657118	6.24e-14	8.47e-13	DOWN
FRMD6	9.90786	10.556	-0.648132	0.638106	9.88e-14	1.28e-12	DOWN
FRMD7	1.32893	1.67971	-0.350783	0.784158	0.000114684	0.000302409	DOWN
FRMPD2	1.28725	1.9413	-0.654051	0.635494	6.71e-09	3.54e-08	DOWN
FRRS1	5.77275	6.4821	-0.709352	0.611595	8.51e-10	5.21e-09	DOWN
FRS2	9.67291	10.2699	-0.596967	0.661142	2.74e-14	4.01e-13	DOWN
FRY	8.48348	9.37475	-0.89127	0.539139	8.06e-18	2.73e-16	DOWN
FRYL	9.85934	10.3162	-0.456853	0.728574	4.7e-13	5.32e-12	DOWN
FRZB	7.6431	8.22508	-0.58198	0.668046	6.02e-07	2.33e-06	DOWN
FSD1L	5.78721	6.31615	-0.528938	0.693065	1.05e-08	5.37e-08	DOWN
FSTL1	12.3054	12.678	-0.37256	0.772411	2.25e-05	6.66e-05	DOWN
FUCA1	9.7904	10.1522	-0.361847	0.778168	5.41e-08	2.47e-07	DOWN
FUT11	7.04997	7.58885	-0.538881	0.688304	7e-17	1.85e-15	DOWN
FUT8	9.56524	10.1875	-0.622295	0.649637	3.26e-12	3.13e-11	DOWN
FYCO1	9.72446	10.3966	-0.672108	0.627589	7.41e-26	4.4e-23	DOWN
FZD3	6.76812	7.15404	-0.385922	0.76529	8.87e-06	2.8e-05	DOWN
FZD4	9.33023	9.90853	-0.578301	0.669752	6.3e-11	4.71e-10	DOWN
G2E3	8.42339	8.79852	-0.375134	0.771034	9.2e-12	8.08e-11	DOWN
G3BP2	11.3018	11.6664	-0.3646	0.776684	7.52e-15	1.22e-13	DOWN
G6PC2	0.245032	0.627392	-0.382361	0.767181	1.08e-09	6.5e-09	DOWN
GAB1	9.01192	9.54596	-0.534031	0.690622	6.18e-15	1.03e-13	DOWN
GABPA	9.29392	9.63182	-0.337895	0.791195	1.32e-13	1.67e-12	DOWN
GABRA2	0.974282	1.41659	-0.442308	0.735956	3.05e-05	8.83e-05	DOWN
GABRB2	3.40865	4.11374	-0.705085	0.613406	2.38e-06	8.3e-06	DOWN
GABRB3	3.6207	4.87487	-1.25416	0.419236	9.02e-10	5.49e-09	DOWN
GALC	9.20832	9.56472	-0.356407	0.781107	1.03e-09	6.22e-09	DOWN
GALNT10	10.0148	10.7163	-0.701534	0.614918	2.12e-13	2.56e-12	DOWN
GALNT4	8.0967	8.73246	-0.635767	0.643598	2.4e-18	9.3e-17	DOWN
GALNT5	5.63168	6.77464	-1.14297	0.452827	5.45e-11	4.13e-10	DOWN
GALNT6	10.6352	11.3666	-0.731376	0.602329	1.54e-07	6.52e-07	DOWN
GALNT7	10.2292	10.9698	-0.740605	0.598488	2.05e-11	1.68e-10	DOWN
GALNTL6	1.47273	1.85401	-0.381283	0.767755	0.000281852	0.000692994	DOWN
GAPT	5.52569	6.06414	-0.538448	0.688511	6.7e-07	2.58e-06	DOWN
GAPVD1	10.0356	10.3964	-0.36083	0.778717	2.74e-14	4.01e-13	DOWN
GAS2L3	4.79894	5.43985	-0.64091	0.641308	0.000157843	0.000405408	DOWN
GAS7	9.13902	9.58555	-0.44653	0.733806	4.07e-06	1.36e-05	DOWN
GATA3	11.8055	12.8355	-1.03001	0.489707	9.49e-08	4.16e-07	DOWN
GATM	8.05942	8.81723	-0.757807	0.591394	3.99e-10	2.59e-09	DOWN
GCC2	9.53967	9.98717	-0.447501	0.733312	1.4e-12	1.45e-11	DOWN
GCNT4	3.6827	4.5933	-0.910597	0.531965	1.38e-11	1.17e-10	DOWN
GDAP1	7.88075	8.46345	-0.582699	0.667714	1.11e-05	3.46e-05	DOWN
GDE1	10.8888	11.2391	-0.350277	0.784433	4.13e-13	4.74e-12	DOWN
GDF3	1.41565	1.78803	-0.372379	0.772507	7.96e-07	3.02e-06	DOWN
GDPD1	5.46427	5.87561	-0.411339	0.751925	2.33e-05	6.87e-05	DOWN
GEM	8.41655	8.9462	-0.529647	0.692724	6.94e-06	2.24e-05	DOWN
GFRA1	9.15015	11.0776	-1.9274	0.262902	1.27e-08	6.42e-08	DOWN
GHR	7.30365	7.98659	-0.682937	0.622896	7.37e-07	2.81e-06	DOWN
GIGYF2	10.6211	10.9566	-0.335526	0.792495	1.02e-15	2.05e-14	DOWN
GIMAP6	8.1652	8.55252	-0.387319	0.764549	0.000112974	0.00029822	DOWN
GIMAP8	7.52467	7.88083	-0.35616	0.781241	0.000390794	0.00093951	DOWN
GIN1	6.73341	7.11624	-0.382835	0.766929	3.92e-15	6.81e-14	DOWN
GIPC2	3.89722	4.39542	-0.498204	0.707988	4.87e-05	0.000136533	DOWN
GJA1	10.9566	11.6135	-0.656851	0.634261	1.67e-05	5.06e-05	DOWN
GJB1	3.48847	4.22984	-0.741364	0.598174	0.000396033	0.00095091	DOWN
GK3P	4.02456	4.39339	-0.368835	0.774408	6.2e-05	0.000170569	DOWN
GLCCI1	8.27552	8.74284	-0.467325	0.723304	3.9e-07	1.55e-06	DOWN
GLCE	9.60049	10.0501	-0.449637	0.732227	1.32e-08	6.64e-08	DOWN
GLDN	4.45456	5.26115	-0.80659	0.571732	1.1e-09	6.61e-09	DOWN
GLI3	9.35806	10.1418	-0.783789	0.580839	2.84e-14	4.12e-13	DOWN
GLIPR1L2	3.98274	4.40781	-0.425066	0.744805	0.000162144	0.000415215	DOWN
GLRB	6.14366	7.24434	-1.10068	0.466297	7.84e-13	8.53e-12	DOWN
GLS2	5.14583	5.78561	-0.639782	0.64181	1.27e-06	4.67e-06	DOWN
GLT8D2	7.83359	8.28651	-0.452919	0.730563	2.18e-05	6.47e-05	DOWN
GLUD1	11.6098	11.9627	-0.352948	0.782982	3.73e-12	3.56e-11	DOWN
GLUD2	8.14836	8.71642	-0.56806	0.674523	2.07e-13	2.51e-12	DOWN
GLUL	13.92	14.4447	-0.524723	0.695092	2.43e-10	1.64e-09	DOWN
GMCL1	8.0071	8.47795	-0.47085	0.721539	3.5e-11	2.76e-10	DOWN
GMFB	10.2453	10.5837	-0.338415	0.79091	1.83e-11	1.51e-10	DOWN
GNA14	5.57725	6.12625	-0.549001	0.683493	5.41e-05	0.000150277	DOWN
GNAQ	10.2543	10.7881	-0.533794	0.690736	3.97e-16	8.76e-15	DOWN
GNG12	10.4637	11.1392	-0.675552	0.626093	1.76e-17	5.45e-16	DOWN
GNG2	8.01477	8.35645	-0.341685	0.789119	4.96e-05	0.000138853	DOWN
GNPDA2	8.0439	8.48907	-0.445168	0.734499	1.18e-13	1.51e-12	DOWN
GNRHR	1.8085	2.35343	-0.544924	0.685427	4.8e-10	3.06e-09	DOWN
GNS	11.9687	12.3337	-0.364961	0.77649	5.57e-15	9.36e-14	DOWN
GOLGA4	11.1685	11.5894	-0.420963	0.746926	7.71e-13	8.43e-12	DOWN
GOLGB1	11.9184	12.3738	-0.455437	0.729289	7.63e-19	3.36e-17	DOWN
GOLIM4	8.67646	9.35872	-0.682251	0.623192	4.6e-10	2.94e-09	DOWN
GOLM1	11.8131	12.1592	-0.346112	0.786701	3.06e-06	1.05e-05	DOWN
GOLPH3L	10.1707	10.5094	-0.338718	0.790744	2.82e-09	1.57e-08	DOWN
GP2	4.48976	6.53372	-2.04396	0.242497	4.19e-11	3.24e-10	DOWN
GPAM	8.32951	8.90702	-0.577508	0.67012	2.77e-14	4.04e-13	DOWN
GPATCH2	8.70135	9.06083	-0.359483	0.779444	2.63e-09	1.47e-08	DOWN
GPC3	6.77511	7.38509	-0.60998	0.655206	0.000315303	0.000769851	DOWN
GPC4	9.35679	9.83606	-0.479269	0.717341	9.94e-05	0.000264785	DOWN
GPD1L	9.80809	10.59	-0.78187	0.581612	8.84e-18	2.96e-16	DOWN
GPD2	10.3039	10.7937	-0.489777	0.712135	5.57e-14	7.62e-13	DOWN
GPR107	11.2971	11.6207	-0.323592	0.799078	1.51e-11	1.27e-10	DOWN
GPR139	0.64627	1.11845	-0.472181	0.720874	5.25e-05	0.000146281	DOWN
GPR141	2.72811	3.38809	-0.659975	0.632889	1.02e-07	4.45e-07	DOWN
GPR160	8.94428	9.66005	-0.715778	0.608877	4.59e-10	2.94e-09	DOWN
GPR21	1.46803	1.85217	-0.384139	0.766236	2.3e-06	8.04e-06	DOWN
GPR34	6.41815	7.0246	-0.606452	0.65681	7.97e-11	5.85e-10	DOWN
GPR75	3.93775	4.32056	-0.382808	0.766943	0.000183598	0.000465651	DOWN
GPR85	4.3927	4.7403	-0.347606	0.785887	2.5e-05	7.35e-05	DOWN
GPR88	1.98463	2.62487	-0.640245	0.641604	3.71e-08	1.73e-07	DOWN
GPRASP2	7.38288	7.74416	-0.361287	0.77847	7.97e-09	4.16e-08	DOWN
GPRIN3	6.15932	6.98469	-0.82537	0.564337	1.14e-09	6.81e-09	DOWN
GPX8	9.35733	9.69992	-0.342586	0.788626	4.47e-05	0.000126037	DOWN
GREB1	9.14106	10.1308	-0.989767	0.503559	8.66e-07	3.27e-06	DOWN
GREB1L	5.39339	6.27341	-0.880026	0.543358	1.55e-06	5.59e-06	DOWN
GREM1	8.72024	9.46215	-0.741903	0.59795	1.47e-05	4.5e-05	DOWN
GRIA1	1.66404	2.32354	-0.6595	0.633098	0.0001986	0.000500968	DOWN
GRIA2	2.95886	3.95256	-0.993698	0.502189	0.000379357	0.000914058	DOWN
GRIK3	6.25791	7.44264	-1.18473	0.439908	7.28e-08	3.25e-07	DOWN
GRM8	2.8763	3.28275	-0.406449	0.754478	0.000133516	0.000348279	DOWN
GRPR	4.27872	5.98458	-1.70586	0.306538	1.15e-10	8.22e-10	DOWN
GSR	9.13058	9.62445	-0.493871	0.710117	2.62e-08	1.26e-07	DOWN
GSTCD	7.86903	8.58564	-0.716611	0.608525	1.04e-19	6.03e-18	DOWN
GTF2A1	6.48563	7.51563	-1.03	0.48971	9.18e-20	5.41e-18	DOWN
GTF2H3	7.53676	7.95271	-0.415955	0.749523	9.19e-11	6.69e-10	DOWN
GTF2I	10.9915	11.4939	-0.502362	0.70595	2.21e-09	1.26e-08	DOWN
GTF2IRD2B	6.89212	7.27845	-0.386322	0.765078	1.48e-08	7.39e-08	DOWN
GTF3C4	8.56172	9.08865	-0.526932	0.694029	4.02e-14	5.64e-13	DOWN
GUCY1A2	4.06422	4.97223	-0.908001	0.532923	8.02e-12	7.11e-11	DOWN
GULP1	6.35358	6.87277	-0.51919	0.697764	3.96e-06	1.33e-05	DOWN
GUSBP3	5.89625	6.98534	-1.08909	0.470057	1.77e-17	5.47e-16	DOWN
GXYLT1	8.85304	9.20215	-0.349105	0.785071	3.07e-13	3.62e-12	DOWN
GXYLT2	6.08432	6.88207	-0.797741	0.575249	6.95e-10	4.32e-09	DOWN
HABP2	2.03412	2.59732	-0.563198	0.6768	0.000392454	0.000942843	DOWN
HCFC2	7.81199	8.28641	-0.474423	0.719754	9.5e-19	4.07e-17	DOWN
HDX	5.16121	5.58529	-0.424074	0.745317	2.58e-07	1.06e-06	DOWN
HEATR5A	8.99158	9.53268	-0.541098	0.687248	7.43e-17	1.96e-15	DOWN
HEATR5B	9.60251	10.021	-0.418511	0.748196	1.92e-15	3.65e-14	DOWN
HECTD1	11.1817	11.6508	-0.469132	0.722399	1.4e-19	7.8e-18	DOWN
HECTD2	7.80802	8.37084	-0.562821	0.676977	1.82e-11	1.5e-10	DOWN
HECW2	7.20823	7.71704	-0.508807	0.702803	2.29e-09	1.3e-08	DOWN
HEG1	10.0293	10.6645	-0.635203	0.64385	4.32e-13	4.93e-12	DOWN
HELB	5.02218	5.35492	-0.332743	0.794025	0.000238152	0.000592488	DOWN
HELZ	10.0093	10.3681	-0.35882	0.779802	8.64e-10	5.28e-09	DOWN
HEPACAM2	2.89768	4.10406	-1.20638	0.433355	4.88e-08	2.24e-07	DOWN
HERC1	10.1944	10.6077	-0.413314	0.750897	2.49e-12	2.46e-11	DOWN
HERC3	8.44185	8.991	-0.549142	0.683426	1.92e-12	1.94e-11	DOWN
HFE	6.84644	7.37185	-0.525406	0.694764	2.13e-09	1.22e-08	DOWN
HGF	4.54745	5.38051	-0.83306	0.561337	2.96e-12	2.87e-11	DOWN
HHAT	8.11193	8.5712	-0.459272	0.727353	1.06e-07	4.61e-07	DOWN
HHEX	6.84373	7.20497	-0.361238	0.778496	0.000263933	0.000652572	DOWN
HIP1	9.80368	10.35	-0.546327	0.684761	5.12e-10	3.25e-09	DOWN
HIPK1	10.3842	10.8179	-0.433735	0.740342	3.94e-16	8.7e-15	DOWN
HIPK2	10.4127	10.8083	-0.395631	0.760157	9.31e-07	3.5e-06	DOWN
HIPK3	8.74727	9.8867	-1.13943	0.45394	3.13e-18	1.19e-16	DOWN
HIVEP1	9.15215	9.5389	-0.386746	0.764853	8.33e-08	3.69e-07	DOWN
HIVEP2	9.14432	9.49166	-0.347338	0.786033	5.37e-07	2.1e-06	DOWN
HMBOX1	6.01123	6.77753	-0.766292	0.587926	5.18e-19	2.44e-17	DOWN
HMCN1	8.14221	9.11797	-0.975759	0.508472	3.3e-11	2.61e-10	DOWN
HMGCS2	4.57706	6.27137	-1.69431	0.309001	1.33e-07	5.7e-07	DOWN
HNMT	9.1523	9.67103	-0.518733	0.697984	3.73e-14	5.24e-13	DOWN
HNRNPH2	11.1447	11.5232	-0.378526	0.769223	3.34e-18	1.25e-16	DOWN
HOOK1	9.36367	9.80102	-0.437347	0.738491	3.09e-10	2.04e-09	DOWN
HOXA5	4.00182	4.50279	-0.500972	0.70663	1.36e-05	4.18e-05	DOWN
HOXA6	1.70365	2.24289	-0.539244	0.688132	4.52e-06	1.5e-05	DOWN
HOXA7	5.36557	5.84311	-0.477533	0.718205	0.000106375	0.000281795	DOWN
HOXA9	4.67709	5.1763	-0.499207	0.707496	1.75e-05	5.29e-05	DOWN
HOXB2	8.02633	8.73061	-0.704273	0.613752	3.88e-06	1.3e-05	DOWN
HOXB3	7.67627	8.17633	-0.50006	0.707077	0.00026723	0.00065987	DOWN
HOXB5	4.28485	5.06811	-0.783258	0.581053	2.05e-05	6.11e-05	DOWN
HOXD8	6.52042	7.08059	-0.560177	0.678219	6.76e-07	2.6e-06	DOWN
HPGDS	4.92957	5.38149	-0.451913	0.731073	0.000312988	0.000764633	DOWN
HRH2	3.42502	3.84953	-0.424511	0.745091	0.000105334	0.000279295	DOWN
HRNR	1.89833	2.52083	-0.6225	0.649544	6.53e-09	3.45e-08	DOWN
HS2ST1	9.57529	9.90285	-0.327553	0.796887	6.14e-12	5.59e-11	DOWN
HS6ST3	4.91102	6.17269	-1.26167	0.417062	1.71e-06	6.12e-06	DOWN
HSD17B4	10.7781	11.2197	-0.441564	0.736336	1.28e-14	1.98e-13	DOWN
HSDL2	9.68547	10.1499	-0.464481	0.724732	1.29e-12	1.35e-11	DOWN
HSPA12A	7.34596	7.84823	-0.502266	0.705997	3.66e-07	1.47e-06	DOWN
HSPA13	9.43009	9.81067	-0.380583	0.768127	1.11e-08	5.65e-08	DOWN
HSPB6	6.96745	7.58395	-0.616495	0.652253	2.18e-05	6.47e-05	DOWN
HTR1B	0.934393	1.45611	-0.521715	0.696544	2.08e-11	1.7e-10	DOWN
HTR1F	2.43069	3.07885	-0.64816	0.638094	1.31e-09	7.75e-09	DOWN
HTR2A	1.56206	1.94286	-0.380803	0.76801	3.29e-05	9.46e-05	DOWN
HTR2B	4.10496	5.15002	-1.04506	0.484625	2.53e-19	1.3e-17	DOWN
HTR7P1	6.52223	7.24452	-0.722282	0.606138	1.41e-14	2.16e-13	DOWN
IBTK	10.1546	10.5629	-0.408359	0.75348	4.69e-14	6.51e-13	DOWN
IDE	8.68996	9.31309	-0.623123	0.649264	2.62e-16	6e-15	DOWN
IDS	11.2324	11.604	-0.371585	0.772933	7.73e-11	5.69e-10	DOWN
IFT46	8.87693	9.27458	-0.397656	0.75909	2.65e-09	1.48e-08	DOWN
IFT81	8.08628	8.42883	-0.342553	0.788645	7.29e-08	3.26e-07	DOWN
IFT88	7.94552	8.3879	-0.44238	0.73592	4.17e-11	3.23e-10	DOWN
IGF1	7.30547	8.25336	-0.947898	0.518387	1.76e-09	1.02e-08	DOWN
IGF1R	10.9839	11.721	-0.737119	0.599936	2.32e-10	1.57e-09	DOWN
IGF2	9.75845	10.5581	-0.799628	0.574497	2.58e-08	1.24e-07	DOWN
IGFBP5	13.2057	13.7936	-0.587886	0.665317	5.19e-05	0.00014475	DOWN
IGSF22	3.35384	3.78244	-0.428597	0.742984	0.000316466	0.000772471	DOWN
IGSF3	10.4859	10.814	-0.328019	0.796629	5.98e-06	1.95e-05	DOWN
IGSF9B	3.2137	4.28179	-1.0681	0.476948	3.35e-10	2.2e-09	DOWN
IKZF2	7.43644	7.91175	-0.475306	0.719314	7.53e-07	2.87e-06	DOWN
IKZF4	7.41016	7.76885	-0.358689	0.779873	1.87e-09	1.08e-08	DOWN
IKZF5	8.73559	9.12835	-0.392761	0.76167	6.9e-15	1.14e-13	DOWN
IL13RA1	11.5173	11.9684	-0.45108	0.731495	8.92e-16	1.81e-14	DOWN
IL17RD	8.59671	9.01837	-0.421666	0.746562	9.58e-05	0.000256067	DOWN
IL1RL1	2.40092	3.04126	-0.640345	0.64156	1.44e-06	5.24e-06	DOWN
IL20RA	6.3773	7.86818	-1.49088	0.355795	5.52e-17	1.51e-15	DOWN
IL33	6.12699	7.01964	-0.892658	0.538621	4.11e-07	1.63e-06	DOWN
IL6ST	8.78759	10.8032	-2.01562	0.247308	2.54e-21	2.4e-19	DOWN
ILDR2	1.39123	1.73492	-0.343692	0.788022	4.82e-05	0.000135241	DOWN
IMPACT	9.64807	10.0511	-0.403016	0.756276	1.07e-12	1.14e-11	DOWN
IMPAD1	11.3554	11.6775	-0.322181	0.79986	5.23e-10	3.32e-09	DOWN
IMPG1	2.29666	2.85187	-0.555211	0.680558	2.39e-07	9.87e-07	DOWN
INHBA	7.40198	8.06237	-0.660392	0.632707	7.07e-06	2.28e-05	DOWN
INMT	5.36697	5.87205	-0.505077	0.704623	0.00034206	0.000830352	DOWN
INO80D	8.78846	9.14941	-0.360951	0.778651	1.36e-14	2.1e-13	DOWN
INPP4B	7.71924	8.79067	-1.07143	0.475846	1.87e-10	1.28e-09	DOWN
INS-IGF2	0.930213	1.31689	-0.386678	0.764889	2.22e-06	7.78e-06	DOWN
INSR	10.7422	11.1327	-0.390433	0.762901	2.46e-12	2.44e-11	DOWN
INTS2	8.14287	8.54601	-0.403138	0.756212	1.93e-07	8.07e-07	DOWN
INTS6	9.2914	9.71512	-0.423722	0.745499	8.44e-16	1.73e-14	DOWN
INTU	6.41622	6.78823	-0.372007	0.772707	2.82e-06	9.71e-06	DOWN
IPMK	4.70671	5.54707	-0.840359	0.558505	3.77e-11	2.95e-10	DOWN
IPO11	8.91849	9.36361	-0.445111	0.734528	4.77e-21	4.15e-19	DOWN
IPO7	11.5732	11.9636	-0.390415	0.76291	1.33e-11	1.14e-10	DOWN
IPO8	10.0431	10.3931	-0.349975	0.784598	5.01e-17	1.39e-15	DOWN
IPP	7.50196	7.99335	-0.49139	0.71134	1.35e-15	2.65e-14	DOWN
IQCA1	5.14917	5.95022	-0.801049	0.573932	1.3e-07	5.58e-07	DOWN
IQCH	5.25698	5.7921	-0.535113	0.690104	8e-09	4.17e-08	DOWN
IQCK	8.61578	8.99363	-0.377854	0.769581	3.43e-08	1.61e-07	DOWN
IQGAP1	12.51	12.9309	-0.420854	0.746983	1.03e-13	1.33e-12	DOWN
IQGAP2	8.86237	9.7284	-0.866034	0.548653	1.17e-11	1.01e-10	DOWN
IQUB	2.65119	3.54126	-0.890066	0.539589	1.89e-11	1.55e-10	DOWN
IRAK3	6.94488	7.51115	-0.566273	0.675359	7.59e-06	2.43e-05	DOWN
IREB2	9.88615	10.2413	-0.355187	0.781768	4.35e-12	4.09e-11	DOWN
IRS1	9.34705	10.0833	-0.736294	0.600279	5.88e-09	3.13e-08	DOWN
ISM1	6.75653	7.3446	-0.588071	0.665232	5.7e-05	0.00015762	DOWN
ITCH	10.1274	10.4589	-0.331501	0.794709	1.02e-12	1.09e-11	DOWN
ITGA1	8.67124	9.39046	-0.719226	0.607423	4.71e-13	5.33e-12	DOWN
ITGA2	8.8407	9.74284	-0.902139	0.535093	1.68e-12	1.71e-11	DOWN
ITGA4	7.8468	8.35905	-0.512247	0.70113	1.61e-05	4.89e-05	DOWN
ITGA8	3.79266	4.69592	-0.903261	0.534677	8.37e-08	3.7e-07	DOWN
ITGA9	6.52937	6.96485	-0.435472	0.739452	0.000107637	0.000284962	DOWN
ITGAV	11.2551	11.755	-0.499937	0.707138	2.6e-12	2.56e-11	DOWN
ITGB3	6.14018	7.00168	-0.861502	0.550379	8.64e-12	7.63e-11	DOWN
ITGBL1	8.85974	9.51118	-0.651443	0.636643	2.4e-05	7.07e-05	DOWN
ITIH2	1.1868	1.69092	-0.504122	0.705089	3.27e-05	9.41e-05	DOWN
ITM2B	12.758	13.1563	-0.398334	0.758734	7.45e-15	1.21e-13	DOWN
ITPR1	9.28516	10.2699	-0.984712	0.505327	1.33e-16	3.28e-15	DOWN
ITPR2	10.2506	10.7754	-0.524786	0.695062	2.62e-06	9.07e-06	DOWN
ITPRIPL2	10.6505	11.0248	-0.374361	0.771447	9.64e-08	4.22e-07	DOWN
ITSN1	9.19055	9.59851	-0.407967	0.753685	9.19e-12	8.07e-11	DOWN
JAK1	11.6115	12.0243	-0.412863	0.751131	1.41e-15	2.75e-14	DOWN
JAK2	8.35108	8.7123	-0.361224	0.778504	2.79e-05	8.13e-05	DOWN
JAM2	6.61151	7.06392	-0.452416	0.730818	1.76e-05	5.31e-05	DOWN
JAM3	8.44954	8.99145	-0.541916	0.686858	7.97e-11	5.85e-10	DOWN
JMJD1C	9.96736	10.449	-0.481675	0.716146	4.08e-12	3.86e-11	DOWN
JMY	8.82781	9.21406	-0.386257	0.765112	9.07e-12	7.98e-11	DOWN
KAT2B	7.79551	8.23523	-0.43972	0.737278	4.3e-08	1.99e-07	DOWN
KATNAL1	8.0098	8.41479	-0.404992	0.75524	2.05e-12	2.06e-11	DOWN
KBTBD3	6.25763	6.65423	-0.396608	0.759642	3.59e-10	2.35e-09	DOWN
KBTBD4	8.29008	8.82082	-0.530738	0.692201	1.76e-16	4.2e-15	DOWN
KBTBD6	8.36497	8.69403	-0.329059	0.796056	1.13e-10	8.08e-10	DOWN
KBTBD7	6.61762	7.40767	-0.790053	0.578323	8.94e-18	2.99e-16	DOWN
KCNA6	3.42704	3.95536	-0.528321	0.693361	7.86e-05	0.000212903	DOWN
KCNAB1	5.50717	5.8608	-0.353632	0.782611	5.32e-05	0.000147968	DOWN
KCNB1	2.47588	3.00225	-0.526365	0.694302	0.000199228	0.000502331	DOWN
KCND2	5.5417	6.42067	-0.878971	0.543755	5.83e-10	3.66e-09	DOWN
KCND3	3.53498	5.04386	-1.50889	0.351382	2.73e-14	4e-13	DOWN
KCNE4	8.34161	9.1978	-0.856191	0.552409	8.15e-06	2.59e-05	DOWN
KCNH1	4.54427	5.57464	-1.03038	0.489582	1.55e-07	6.56e-07	DOWN
KCNIP4	3.6159	4.12713	-0.511225	0.701626	1.47e-15	2.85e-14	DOWN
KCNJ11	7.35932	8.02465	-0.665331	0.630544	7.87e-05	0.00021304	DOWN
KCNJ2	6.21096	6.62541	-0.414449	0.750306	2.48e-06	8.62e-06	DOWN
KCNJ3	3.20095	4.74621	-1.54525	0.342635	7.39e-07	2.82e-06	DOWN
KCNK6	8.54757	8.89818	-0.350616	0.784249	0.000224682	0.000561493	DOWN
KCNMA1	8.22772	8.87576	-0.64804	0.638147	3.89e-07	1.55e-06	DOWN
KCNQ1OT1	6.22645	6.72143	-0.49498	0.709571	4.82e-08	2.22e-07	DOWN
KCNS2	1.22343	1.73658	-0.513142	0.700695	1.61e-07	6.79e-07	DOWN
KCNT2	2.85068	3.2247	-0.374019	0.77163	0.000173053	0.000441116	DOWN
KCTD12	10.3026	10.7825	-0.479927	0.717014	8.85e-09	4.57e-08	DOWN
KCTD16	1.50629	2.05033	-0.544038	0.685849	3.24e-11	2.57e-10	DOWN
KCTD20	10.225	10.6383	-0.413308	0.7509	1.14e-10	8.15e-10	DOWN
KCTD21	8.45032	8.82814	-0.377818	0.769601	4.29e-10	2.76e-09	DOWN
KCTD3	11.2833	11.8209	-0.537608	0.688912	1.18e-12	1.24e-11	DOWN
KCTD6	7.70429	8.28389	-0.5796	0.669149	6.07e-11	4.55e-10	DOWN
KDM3B	10.844	11.2552	-0.411267	0.751963	2.08e-17	6.32e-16	DOWN
KDM5A	10.3988	10.7287	-0.329927	0.795577	8.43e-12	7.46e-11	DOWN
KDM5B	11.4539	11.8251	-0.371181	0.773149	1.37e-10	9.69e-10	DOWN
KDM6A	9.43003	9.75612	-0.326091	0.797695	1.33e-08	6.69e-08	DOWN
KDR	9.15378	9.65881	-0.505031	0.704645	5.96e-09	3.16e-08	DOWN
KERA	2.80822	3.75396	-0.945743	0.519162	1.09e-09	6.55e-09	DOWN
KIAA0040	10.636	11.3529	-0.716866	0.608418	2.29e-14	3.39e-13	DOWN
KIAA0087	0.874387	1.41693	-0.542547	0.686558	2.77e-09	1.55e-08	DOWN
KIAA0232	10.0415	10.5191	-0.47757	0.718186	3.5e-11	2.76e-10	DOWN
KIAA0586	8.20454	8.55898	-0.354436	0.782175	2.59e-11	2.09e-10	DOWN
KIAA0754	5.53542	6.40418	-0.86876	0.547617	2.26e-08	1.09e-07	DOWN
KIAA0895	7.7131	8.08415	-0.371054	0.773218	3.94e-06	1.32e-05	DOWN
KIAA1107	6.28574	6.66685	-0.381117	0.767843	8.72e-07	3.29e-06	DOWN
KIAA1109	10.1087	10.7603	-0.651672	0.636542	1.27e-17	4.07e-16	DOWN
KIAA1143	9.12175	9.52194	-0.400184	0.757762	7.52e-21	6.25e-19	DOWN
KIAA1210	2.06441	2.87387	-0.809464	0.570594	1.5e-09	8.78e-09	DOWN
KIAA1217	11.1939	11.5643	-0.370365	0.773587	5.89e-09	3.13e-08	DOWN
KIAA1324	11.947	12.6934	-0.746459	0.596065	1.27e-06	4.67e-06	DOWN
KIAA1324L	7.28876	8.2472	-0.958445	0.514611	2.26e-12	2.26e-11	DOWN
KIAA1328	6.61398	6.93801	-0.324031	0.798835	9.62e-10	5.83e-09	DOWN
KIAA1671	10.4798	10.8077	-0.327839	0.796729	9.72e-09	5e-08	DOWN
KIAA1958	5.23582	5.90495	-0.669131	0.628886	1.19e-11	1.03e-10	DOWN
KIAA2026	9.12195	9.56859	-0.446644	0.733748	1.16e-12	1.22e-11	DOWN
KIDINS220	10.4817	10.951	-0.469256	0.722337	1.12e-14	1.75e-13	DOWN
KIF13A	9.45679	10.0489	-0.592112	0.663371	1.52e-13	1.89e-12	DOWN
KIF13B	9.85009	10.4836	-0.633485	0.644618	9.99e-10	6.05e-09	DOWN
KIF16B	9.46892	10.057	-0.588059	0.665237	2.39e-09	1.35e-08	DOWN
KIF27	5.94505	6.54038	-0.595328	0.661894	1.12e-11	9.72e-11	DOWN
KIF2A	8.76284	9.1128	-0.34996	0.784606	1.27e-09	7.53e-09	DOWN
KIF3A	8.32872	8.86258	-0.533856	0.690706	1.53e-15	2.96e-14	DOWN
KIF3B	10.7416	11.0972	-0.355593	0.781548	7.9e-14	1.05e-12	DOWN
KIF5C	7.20049	8.28073	-1.08024	0.472952	3.38e-11	2.67e-10	DOWN
KITLG	9.17841	10.2131	-1.03467	0.488128	2.57e-15	4.7e-14	DOWN
KL	4.00597	4.95001	-0.944041	0.519775	7.69e-14	1.02e-12	DOWN
KLF12	8.17819	8.64359	-0.465403	0.724269	6.05e-08	2.73e-07	DOWN
KLF3	9.96834	10.3508	-0.382423	0.767148	1.57e-16	3.79e-15	DOWN
KLF7	5.90941	6.46454	-0.555131	0.680595	2.97e-07	1.21e-06	DOWN
KLF9	9.51502	9.85662	-0.341605	0.789163	2.85e-05	8.29e-05	DOWN
KLHDC10	8.95924	9.55576	-0.596514	0.66135	1.77e-14	2.65e-13	DOWN
KLHDC1	5.09009	5.66889	-0.578799	0.669521	3.04e-09	1.69e-08	DOWN
KLHDC7A	5.26453	6.40909	-1.14456	0.452328	2.74e-05	8e-05	DOWN
KLHL11	4.77586	5.8034	-1.02755	0.490544	1.32e-17	4.22e-16	DOWN
KLHL15	7.73324	8.068	-0.334763	0.792915	5.78e-07	2.25e-06	DOWN
KLHL20	8.26912	8.60558	-0.336453	0.791986	2.81e-10	1.87e-09	DOWN
KLHL2	8.01114	8.39536	-0.384222	0.766192	8.98e-08	3.95e-07	DOWN
KLHL23	6.15764	6.70757	-0.549931	0.683053	1.77e-05	5.34e-05	DOWN
KLHL28	7.94166	8.60293	-0.661266	0.632323	2.3e-20	1.71e-18	DOWN
KLHL3	6.26856	6.68994	-0.421376	0.746712	6.9e-07	2.65e-06	DOWN
KLHL4	2.84128	3.57698	-0.735704	0.600525	1.07e-10	7.68e-10	DOWN
KLHL5	9.18068	9.52205	-0.34137	0.789291	5.31e-06	1.74e-05	DOWN
KLHL8	7.94318	8.41675	-0.473572	0.720179	2.4e-12	2.38e-11	DOWN
KLHL9	9.93115	10.3638	-0.432695	0.740876	2.46e-16	5.7e-15	DOWN
KLK4	4.31037	5.09399	-0.783622	0.580907	3.88e-05	0.000110287	DOWN
KRAS	9.96657	10.3138	-0.347211	0.786102	9.67e-11	7.02e-10	DOWN
KRBA2	5.44653	5.90365	-0.457119	0.72844	5.74e-06	1.88e-05	DOWN
KRT37	1.41917	1.83995	-0.420773	0.747024	0.000263115	0.000650736	DOWN
KSR2	4.83718	5.41895	-0.581769	0.668144	2.38e-06	8.3e-06	DOWN
KTN1	12.0731	12.44	-0.366865	0.775466	3.76e-11	2.94e-10	DOWN
LAMA2	8.02419	9.04434	-1.02015	0.493066	6.48e-14	8.77e-13	DOWN
LAMA3	8.46502	9.16928	-0.704261	0.613757	1.21e-05	3.75e-05	DOWN
LAMA4	10.5168	10.8435	-0.326747	0.797332	7.48e-05	0.000203346	DOWN
LAMC1	11.6979	12.081	-0.38304	0.76682	3.14e-07	1.27e-06	DOWN
LANCL1	10.2558	10.6616	-0.405793	0.754821	2.2e-16	5.12e-15	DOWN
LARP4	10.1012	10.4951	-0.393881	0.76108	5.55e-16	1.18e-14	DOWN
LATS1	7.64449	8.5651	-0.920606	0.528287	9.99e-19	4.26e-17	DOWN
LAYN	6.56564	6.92401	-0.358378	0.780041	0.000141051	0.000366103	DOWN
LCA5	6.47243	7.24486	-0.772433	0.585429	2.88e-16	6.55e-15	DOWN
LCA5L	6.05261	6.44669	-0.394076	0.760977	9.18e-08	4.03e-07	DOWN
LCMT2	8.1893	8.51192	-0.322621	0.799616	2.69e-09	1.5e-08	DOWN
LCOR	5.71981	6.82433	-1.10452	0.465057	1.67e-17	5.2e-16	DOWN
LCORL	5.71391	6.15234	-0.43843	0.737937	1.74e-13	2.14e-12	DOWN
LDB2	7.42235	7.86455	-0.442199	0.736012	2.84e-06	9.77e-06	DOWN
LDB3	4.07838	4.54123	-0.462849	0.725552	1.39e-08	6.97e-08	DOWN
LDLRAD1	0.96413	1.46481	-0.500679	0.706774	1.32e-06	4.83e-06	DOWN
LEMD3	9.13178	9.4625	-0.330726	0.795136	2.89e-14	4.19e-13	DOWN
LEPR	6.83456	7.53966	-0.705098	0.613401	2.28e-10	1.54e-09	DOWN
LEPROT	8.38413	9.13326	-0.749135	0.59496	5.44e-16	1.16e-14	DOWN
LETM2	5.19081	5.5767	-0.385894	0.765304	0.000300536	0.000736303	DOWN
LGALS12	3.22647	4.01172	-0.785246	0.580253	5.52e-05	0.000153036	DOWN
LGALS8	10.0404	10.5881	-0.547602	0.684156	1.34e-15	2.64e-14	DOWN
LIFR	8.46258	9.16439	-0.701811	0.6148	1.4e-10	9.89e-10	DOWN
LIG4	7.68423	8.04652	-0.362291	0.777928	3.09e-08	1.46e-07	DOWN
LILRA1	2.30538	2.72712	-0.421742	0.746523	1.85e-05	5.56e-05	DOWN
LILRA2	4.67003	5.3685	-0.69847	0.616225	4.35e-14	6.06e-13	DOWN
LIMA1	10.7583	11.3648	-0.606486	0.656794	1.62e-14	2.45e-13	DOWN
LIMCH1	9.65505	10.3145	-0.659481	0.633106	1.44e-09	8.46e-09	DOWN
LIMS1	7.68627	8.3154	-0.629139	0.646562	2.59e-09	1.45e-08	DOWN
LIMS3	2.01151	2.55469	-0.54318	0.686257	8.99e-09	4.64e-08	DOWN
LIPH	6.68922	7.19216	-0.502944	0.705666	2.69e-05	7.86e-05	DOWN
LMBR1	9.72922	10.1209	-0.391647	0.762259	5.06e-13	5.68e-12	DOWN
LMBRD2	6.75522	7.72902	-0.973803	0.509162	8.35e-21	6.84e-19	DOWN
LMLN	8.03414	8.54188	-0.507742	0.703322	8.58e-16	1.76e-14	DOWN
LMTK2	7.57635	8.19445	-0.618108	0.651525	9.58e-10	5.81e-09	DOWN
LMX1B	9.38847	10.0121	-0.623584	0.649057	3.81e-08	1.78e-07	DOWN
LNPEP	7.13851	8.11378	-0.975265	0.508647	2.21e-20	1.65e-18	DOWN
LNX1	7.9362	8.39152	-0.455326	0.729345	3.63e-06	1.23e-05	DOWN
LNX2	8.7571	9.30676	-0.549659	0.683181	1.41e-16	3.46e-15	DOWN
LONRF2	7.18505	8.66497	-1.47992	0.358508	5.91e-12	5.4e-11	DOWN
LOX	9.0844	9.62751	-0.543104	0.686293	1.57e-06	5.66e-06	DOWN
LPAR1	7.66724	8.35953	-0.692284	0.618873	1.5e-12	1.55e-11	DOWN
LPAR4	2.35959	3.06884	-0.709252	0.611637	5.24e-14	7.2e-13	DOWN
LPCAT2	8.13118	8.66737	-0.536189	0.68959	1.47e-10	1.03e-09	DOWN
LPP	7.91264	8.77873	-0.866094	0.54863	8.51e-19	3.7e-17	DOWN
LRBA	10.8255	11.5807	-0.755241	0.592447	6.07e-18	2.13e-16	DOWN
LRCH1	8.58647	9.0148	-0.428322	0.743125	6.13e-12	5.59e-11	DOWN
LRCH2	4.27573	4.99121	-0.715474	0.609005	1.89e-12	1.91e-11	DOWN
LRFN5	2.85952	3.55184	-0.692317	0.618859	1.38e-07	5.9e-07	DOWN
LRIG1	11.123	11.7634	-0.640457	0.64151	4.28e-12	4.03e-11	DOWN
LRP1	12.3298	12.7011	-0.37129	0.773091	2.44e-05	7.18e-05	DOWN
LRP1B	2.92581	3.9022	-0.976383	0.508252	2.42e-06	8.42e-06	DOWN
LRP2BP	5.18954	5.61119	-0.421647	0.746572	1.93e-08	9.44e-08	DOWN
LRP4	6.0608	6.40281	-0.342007	0.788943	0.00016308	0.000417177	DOWN
LRRC31	2.34641	4.26105	-1.91464	0.265238	2.51e-13	2.99e-12	DOWN
LRRC32	9.41779	9.78951	-0.371719	0.772861	2.98e-05	8.65e-05	DOWN
LRRC37A2	5.98883	7.0556	-1.06677	0.477386	7.54e-31	4.33e-27	DOWN
LRRC37A3	6.78231	7.11722	-0.334902	0.792838	4.84e-05	0.000135758	DOWN
LRRC37A	7.8843	8.53659	-0.652285	0.636272	4.82e-23	9.02e-21	DOWN
LRRC46	5.53793	6.09329	-0.55536	0.680487	0.000128177	0.000335267	DOWN
LRRC49	6.20203	6.54176	-0.339732	0.790188	5.24e-05	0.000146073	DOWN
LRRC4C	5.08586	6.10688	-1.02102	0.492767	7.43e-10	4.6e-09	DOWN
LRRC58	10.0276	10.379	-0.351466	0.783787	2.95e-09	1.64e-08	DOWN
LRRC6	5.96978	6.84337	-0.873585	0.545789	5.78e-11	4.36e-10	DOWN
LRRC70	4.8311	5.15837	-0.327263	0.797047	0.00027023	0.000666991	DOWN
LRRFIP1	11.2302	11.727	-0.496731	0.708711	8.31e-20	5e-18	DOWN
LRRK1	7.89828	8.28123	-0.38295	0.766868	6.48e-05	0.000177818	DOWN
LRRK2	6.69783	7.38947	-0.691643	0.619148	1.83e-08	9e-08	DOWN
LRRN3	4.13241	4.63404	-0.501631	0.706308	1.34e-05	4.13e-05	DOWN
LRRN4CL	4.4294	4.95791	-0.528503	0.693274	0.000342478	0.000831132	DOWN
LRRTM2	2.56169	3.05893	-0.497246	0.708458	1.71e-07	7.18e-07	DOWN
LTBP2	11.1224	11.6428	-0.520395	0.697181	3.43e-07	1.38e-06	DOWN
LUM	12.8406	13.4245	-0.583973	0.667124	9.97e-05	0.000265502	DOWN
LUZP1	9.3881	9.74466	-0.356566	0.781021	2.17e-10	1.47e-09	DOWN
LUZP2	2.82781	3.56126	-0.733445	0.601466	7.99e-06	2.55e-05	DOWN
LY6G6C	2.78086	3.63346	-0.852605	0.553784	2.11e-06	7.42e-06	DOWN
LYRM7	7.91085	8.39117	-0.480318	0.71682	7.47e-25	2.92e-22	DOWN
LYSMD3	8.58208	9.14776	-0.565682	0.675636	2.37e-22	3.24e-20	DOWN
LYST	9.17534	9.76714	-0.591803	0.663513	9.19e-14	1.2e-12	DOWN
LZTFL1	8.86339	9.37538	-0.511989	0.701255	6.71e-17	1.79e-15	DOWN
MAB21L1	3.55795	4.22326	-0.665316	0.630551	5.41e-07	2.11e-06	DOWN
MACC1	8.34444	8.798	-0.453557	0.73024	4.87e-05	0.000136533	DOWN
MACF1	12.0472	12.4957	-0.448538	0.732785	9.78e-13	1.05e-11	DOWN
MACROD2	5.64779	6.20278	-0.554991	0.680661	6.36e-06	2.06e-05	DOWN
MAG	2.42627	3.07932	-0.653059	0.635931	0.00014325	0.000371195	DOWN
MAGI1	8.75904	9.27645	-0.517416	0.698622	1.19e-09	7.08e-09	DOWN
MAGI2	6.98021	7.46014	-0.479929	0.717013	3.41e-05	9.78e-05	DOWN
MAGI3	9.10961	9.85982	-0.750208	0.594518	8.81e-16	1.79e-14	DOWN
MAK	3.71664	4.22693	-0.510291	0.702081	0.000233288	0.000581733	DOWN
MAMDC2	5.43095	6.13604	-0.705087	0.613405	3.94e-06	1.32e-05	DOWN
MAML3	7.86828	8.39518	-0.526901	0.694044	2.83e-08	1.35e-07	DOWN
MAN1A1	9.21914	10.0394	-0.820211	0.566359	9.15e-11	6.66e-10	DOWN
MAN1A2	9.04806	9.692	-0.643941	0.639962	8.73e-19	3.78e-17	DOWN
MAN1C1	7.64409	8.05362	-0.409532	0.752868	4.59e-05	0.000129125	DOWN
MAN2A1	8.25736	9.24099	-0.983623	0.505708	5.06e-18	1.81e-16	DOWN
MANEA	8.18635	8.59336	-0.407009	0.754185	2.15e-08	1.04e-07	DOWN
MAOA	7.06886	8.00156	-0.932697	0.523878	3.36e-08	1.58e-07	DOWN
MAP1A	8.36442	8.89391	-0.52949	0.6928	1.66e-08	8.23e-08	DOWN
MAP1B	9.42363	9.98183	-0.558196	0.679151	1.36e-07	5.82e-07	DOWN
MAP2K4	9.28377	9.73792	-0.454143	0.729944	5.42e-13	6.05e-12	DOWN
MAP3K13	5.0746	5.46921	-0.394601	0.760699	1.84e-05	5.54e-05	DOWN
MAP3K1	10.0126	10.7652	-0.752553	0.593552	3.24e-16	7.25e-15	DOWN
MAP3K2	8.77162	9.34864	-0.577016	0.670349	6.9e-15	1.14e-13	DOWN
MAP3K5	8.24907	8.59943	-0.350358	0.78439	0.000278731	0.000685908	DOWN
MAP3K9	6.25727	6.69228	-0.435006	0.739691	6.76e-08	3.03e-07	DOWN
MAP9	8.04759	8.48156	-0.433972	0.740221	7.68e-06	2.46e-05	DOWN
MAPK8	7.713	8.13255	-0.419558	0.747654	3.36e-06	1.14e-05	DOWN
MAPT	9.1899	10.2329	-1.04304	0.485302	1.66e-06	5.96e-06	DOWN
MARVELD2	8.21934	8.81831	-0.598973	0.660224	2.15e-18	8.43e-17	DOWN
MASP2	3.42149	3.80093	-0.379437	0.768738	0.000375235	0.000905013	DOWN
MAST4	7.96432	9.06987	-1.10555	0.464725	8.14e-14	1.08e-12	DOWN
MATN3	7.82939	8.43772	-0.608325	0.655958	3.69e-05	0.000105269	DOWN
MBD5	7.81875	8.20329	-0.384542	0.766022	6.25e-12	5.68e-11	DOWN
MBLAC2	7.05389	7.57069	-0.516799	0.698921	2.56e-14	3.76e-13	DOWN
MBNL2	9.94694	10.3184	-0.371419	0.773022	1.63e-07	6.87e-07	DOWN
MBNL3	4.33565	5.09254	-0.756886	0.591772	4.27e-08	1.98e-07	DOWN
MBTPS2	8.95463	9.41043	-0.455802	0.729105	8e-16	1.65e-14	DOWN
MCC	8.6374	9.3072	-0.669797	0.628595	1.56e-12	1.6e-11	DOWN
MCCC2	11.3076	11.8648	-0.557142	0.679647	8.99e-10	5.48e-09	DOWN
MCTP1	5.88449	6.61412	-0.729625	0.60306	3.01e-08	1.43e-07	DOWN
MDGA1	6.42821	6.88993	-0.461724	0.726118	7.64e-06	2.44e-05	DOWN
MDN1	9.35791	9.81105	-0.453142	0.73045	3.26e-06	1.11e-05	DOWN
MECOM	7.09596	7.74054	-0.644584	0.639677	1.5e-12	1.55e-11	DOWN
MED12L	3.45742	4.09823	-0.640807	0.641354	5.67e-06	1.85e-05	DOWN
MED13	10.5734	11.0667	-0.493274	0.710411	4.13e-14	5.77e-13	DOWN
MED13L	10.8765	11.6557	-0.779226	0.582679	1.31e-18	5.43e-17	DOWN
MED23	9.4703	9.83785	-0.367553	0.775096	9.26e-10	5.63e-09	DOWN
MEF2A	9.95597	10.304	-0.348056	0.785642	7.5e-08	3.34e-07	DOWN
MEF2C	8.66788	9.01451	-0.346629	0.786419	2.86e-05	8.32e-05	DOWN
MEGF9	9.88468	10.6056	-0.720947	0.606699	1.33e-13	1.68e-12	DOWN
MEIS3P1	7.96619	8.75894	-0.792746	0.577244	4.89e-25	2.1e-22	DOWN
MESTIT1	0.886863	1.3384	-0.451536	0.731264	1.77e-08	8.73e-08	DOWN
METTL14	8.01514	8.45449	-0.439346	0.737469	2.37e-17	7.16e-16	DOWN
MFAP3	9.49848	10.1199	-0.621456	0.650014	2.75e-27	4.3e-24	DOWN
MFSD6	9.98093	10.5091	-0.528153	0.693442	1.46e-14	2.23e-13	DOWN
MGA	9.55466	9.99413	-0.439473	0.737404	1.88e-14	2.8e-13	DOWN
MGAT4A	10.203	10.7381	-0.535102	0.69011	3.23e-08	1.53e-07	DOWN
MGAT5	6.60535	7.5353	-0.929947	0.524878	1.05e-10	7.56e-10	DOWN
MIA3	10.993	11.4686	-0.475563	0.719186	7.85e-15	1.27e-13	DOWN
MIB1	10.3062	10.8146	-0.508385	0.703009	8.05e-16	1.66e-14	DOWN
MICAL2	10.4943	11.0203	-0.525988	0.694483	3.52e-11	2.77e-10	DOWN
MICALCL	4.51639	5.72417	-1.20778	0.432933	6.84e-17	1.82e-15	DOWN
MID2	8.75176	9.16182	-0.410064	0.75259	1.14e-12	1.2e-11	DOWN
MIER1	9.53462	9.97673	-0.442105	0.73606	1.87e-19	1.01e-17	DOWN
MIER3	8.75758	9.31231	-0.55473	0.680785	7.15e-20	4.44e-18	DOWN
MIPOL1	6.77006	7.35682	-0.586756	0.665838	2.58e-13	3.08e-12	DOWN
MITF	7.51594	7.98218	-0.466241	0.723848	1.35e-08	6.78e-08	DOWN
MKLN1	10.2105	10.6133	-0.402835	0.756371	1.9e-21	1.93e-19	DOWN
MKX	3.98949	4.73752	-0.748034	0.595414	5.41e-05	0.000150277	DOWN
MLANA	1.03748	1.44993	-0.412453	0.751345	2.14e-11	1.75e-10	DOWN
MLLT3	7.86855	8.34463	-0.476077	0.71893	3.3e-08	1.56e-07	DOWN
MME	7.83492	8.43489	-0.599973	0.659766	4.87e-06	1.61e-05	DOWN
MMP16	5.68413	6.45378	-0.769644	0.586562	2.18e-08	1.06e-07	DOWN
MMRN1	5.02838	5.94994	-0.921568	0.527935	1.39e-06	5.07e-06	DOWN
MMRN2	8.88403	9.32536	-0.44133	0.736456	1.47e-06	5.33e-06	DOWN
MNS1	5.95272	6.39696	-0.444239	0.734972	6.97e-05	0.000190263	DOWN
MON2	9.69955	10.1049	-0.405308	0.755075	2.17e-15	4.06e-14	DOWN
MORC3	9.2244	9.65809	-0.433687	0.740367	1.29e-14	1.99e-13	DOWN
MOSPD2	7.39746	8.02428	-0.626815	0.647605	2.5e-18	9.65e-17	DOWN
MPDZ	8.89726	9.43971	-0.542454	0.686602	9.4e-12	8.25e-11	DOWN
MPHOSPH8	9.33022	9.68364	-0.353425	0.782724	6.77e-13	7.45e-12	DOWN
MPP2	6.70238	7.21989	-0.517504	0.698579	7.53e-05	0.000204673	DOWN
MPP5	9.17345	9.60625	-0.432794	0.740826	5.77e-15	9.63e-14	DOWN
MPP7	8.11479	9.04802	-0.933235	0.523683	2.6e-15	4.75e-14	DOWN
MPV17L	6.6404	7.18498	-0.54458	0.685591	7.72e-05	0.00020944	DOWN
MPZL3	4.59247	5.20322	-0.61075	0.654856	5.42e-10	3.43e-09	DOWN
MRPL42P5	2.2783	2.72086	-0.442558	0.735829	1.25e-05	3.87e-05	DOWN
MRVI1	7.92139	8.33162	-0.410234	0.752501	2.87e-05	8.34e-05	DOWN
MS4A14	5.53681	6.15308	-0.61627	0.652355	3.26e-06	1.11e-05	DOWN
MS4A2	4.26878	5.23691	-0.968129	0.511168	2.24e-08	1.08e-07	DOWN
MS4A7	8.86331	9.50825	-0.644934	0.639522	4.35e-08	2.01e-07	DOWN
MSH3	8.49789	8.96788	-0.469994	0.721967	4.56e-21	3.98e-19	DOWN
MSI2	8.28083	8.66714	-0.386316	0.765081	3.15e-05	9.09e-05	DOWN
MSR1	9.12445	9.56158	-0.43713	0.738602	8.57e-07	3.24e-06	DOWN
MSRB3	8.7661	9.40494	-0.638846	0.642227	7.31e-10	4.53e-09	DOWN
MTM1	8.12381	8.46913	-0.345318	0.787135	2.17e-09	1.24e-08	DOWN
MTMR7	5.06772	5.56777	-0.500048	0.707083	4.33e-06	1.44e-05	DOWN
MTMR9	8.0436	8.49052	-0.446924	0.733605	1.06e-15	2.12e-14	DOWN
MTR	9.95942	10.3584	-0.399019	0.758374	4.23e-13	4.84e-12	DOWN
MTSS1	9.81016	10.1994	-0.389218	0.763543	3.28e-05	9.44e-05	DOWN
MTUS1	10.2104	10.817	-0.606593	0.656746	3.11e-13	3.66e-12	DOWN
MTX3	8.83373	9.25291	-0.419177	0.747851	9e-13	9.67e-12	DOWN
MXRA5	12.0934	12.656	-0.562623	0.67707	4.01e-08	1.86e-07	DOWN
MYB	9.42895	10.3591	-0.93011	0.524818	1.25e-06	4.6e-06	DOWN
MYCBP2	10.0766	10.5541	-0.4775	0.718221	5.59e-09	2.98e-08	DOWN
MYCT1	6.85778	7.40788	-0.550108	0.682969	6.35e-09	3.36e-08	DOWN
MYH11	8.6662	9.5962	-0.930003	0.524857	5.22e-08	2.39e-07	DOWN
MYLIP	9.42675	9.8443	-0.417551	0.748694	1.42e-09	8.35e-09	DOWN
MYO16	2.8341	3.31784	-0.48374	0.715122	4.88e-05	0.000136791	DOWN
MYO1B	10.5733	10.9706	-0.397229	0.759315	1.58e-07	6.67e-07	DOWN
MYO5A	9.38591	9.82975	-0.443839	0.735176	1.27e-11	1.09e-10	DOWN
MYO5C	9.69366	10.2961	-0.602426	0.658645	1.51e-11	1.27e-10	DOWN
MYO6	11.5655	12.0471	-0.481548	0.716209	1.3e-10	9.23e-10	DOWN
MYO9A	7.72509	8.65525	-0.93016	0.5248	6.3e-19	2.87e-17	DOWN
MYOCD	1.90871	2.7972	-0.88849	0.540179	1.57e-14	2.39e-13	DOWN
MYOF	11.7154	12.1756	-0.46023	0.72687	1.08e-09	6.5e-09	DOWN
MYOM1	4.61559	5.00531	-0.389723	0.763276	3.94e-05	0.0001119	DOWN
MYRIP	4.65444	5.88719	-1.23275	0.425505	3.08e-12	2.98e-11	DOWN
MYSM1	6.43153	7.14461	-0.713078	0.610017	8.5e-12	7.51e-11	DOWN
N4BP2	6.5521	7.52586	-0.973753	0.50918	4.82e-16	1.04e-14	DOWN
NAA30	8.86986	9.21812	-0.348269	0.785526	1.52e-14	2.32e-13	DOWN
NAALADL2	7.32547	7.92852	-0.603046	0.658362	1.11e-06	4.11e-06	DOWN
NAIP	5.44547	6.1944	-0.748922	0.595048	3.13e-12	3.01e-11	DOWN
NAP1L2	4.40213	4.99872	-0.596588	0.661316	0.000177517	0.000451826	DOWN
NAP1L3	5.48225	5.93031	-0.448053	0.733032	1.27e-05	3.92e-05	DOWN
NAPEPLD	8.32451	8.79818	-0.473664	0.720133	2.38e-24	7.45e-22	DOWN
NAT1	8.2082	9.97266	-1.76446	0.294336	6.65e-14	8.96e-13	DOWN
NAV3	5.64719	6.61676	-0.969568	0.510659	6.14e-12	5.59e-11	DOWN
NBEA	6.97077	8.08271	-1.11194	0.46267	5.01e-15	8.5e-14	DOWN
NBEAL1	6.19732	7.24157	-1.04425	0.484896	1.52e-16	3.68e-15	DOWN
NBPF10	9.12391	9.77865	-0.654739	0.63519	2.78e-07	1.14e-06	DOWN
NBPF14	7.94663	8.62341	-0.676784	0.625558	1.82e-10	1.25e-09	DOWN
NBPF15	7.25354	7.90945	-0.655912	0.634674	9.51e-08	4.17e-07	DOWN
NBPF4	3.70867	4.83186	-1.1232	0.459075	6.73e-06	2.17e-05	DOWN
NBPF6	2.21321	3.35267	-1.13946	0.45393	4.2e-06	1.4e-05	DOWN
NBR1	11.3739	11.7936	-0.419721	0.747569	1.2e-14	1.86e-13	DOWN
NCAM2	5.7264	7.08557	-1.35918	0.389805	1.25e-11	1.08e-10	DOWN
NCEH1	8.59512	9.11285	-0.517731	0.698469	1.7e-11	1.41e-10	DOWN
NCKAP5	7.05581	7.52435	-0.468539	0.722696	2.02e-05	6.03e-05	DOWN
NCOA1	10.1798	10.6035	-0.42365	0.745536	1.6e-14	2.42e-13	DOWN
NCOA2	8.52202	9.4922	-0.970185	0.51044	2.31e-12	2.3e-11	DOWN
NCOA3	10.2347	10.5601	-0.325369	0.798094	3.14e-07	1.27e-06	DOWN
NCOR1	10.5706	11.0924	-0.521822	0.696492	4.39e-15	7.56e-14	DOWN
NDST1	11.4367	11.7848	-0.348113	0.785611	1.6e-10	1.11e-09	DOWN
NEBL	10.78	11.263	-0.483044	0.715467	3.11e-09	1.72e-08	DOWN
NECAB1	4.48557	4.99523	-0.509668	0.702384	1.27e-06	4.67e-06	DOWN
NEDD1	8.83179	9.20633	-0.374533	0.771355	4.76e-14	6.61e-13	DOWN
NEDD4	8.23295	8.77611	-0.54316	0.686266	6.35e-12	5.76e-11	DOWN
NEDD4L	10.1377	10.4953	-0.357557	0.780485	5.49e-05	0.000152253	DOWN
NEFH	5.17403	6.24935	-1.07532	0.474567	2.9e-12	2.82e-11	DOWN
NEGR1	6.68203	7.38984	-0.707808	0.61225	1.94e-06	6.87e-06	DOWN
NEK10	4.63552	6.01122	-1.37571	0.385364	2.45e-08	1.18e-07	DOWN
NEK11	7.78566	8.13608	-0.350412	0.78436	1.03e-06	3.84e-06	DOWN
NEK1	8.10313	8.62889	-0.525757	0.694595	6.11e-19	2.81e-17	DOWN
NEK4	8.61331	9.07134	-0.458025	0.727982	2.75e-14	4.02e-13	DOWN
NEK5	2.93646	3.94785	-1.01139	0.49607	1.51e-10	1.05e-09	DOWN
NEK7	9.97624	10.3398	-0.363541	0.777254	2e-09	1.15e-08	DOWN
NEK9	10.5268	10.8507	-0.323931	0.79889	1.52e-11	1.28e-10	DOWN
NELL2	6.736	7.9717	-1.2357	0.424636	2.91e-08	1.39e-07	DOWN
NEO1	10.1681	10.552	-0.383897	0.766364	6.32e-07	2.44e-06	DOWN
NEU3	5.89999	6.51401	-0.614017	0.653375	6.18e-09	3.27e-08	DOWN
NEXN	7.24924	7.63732	-0.388081	0.764146	5.26e-05	0.000146512	DOWN
NF1	10.3967	10.9799	-0.583214	0.667475	1.6e-18	6.45e-17	DOWN
NFATC2	4.91274	5.79337	-0.880628	0.543131	5.87e-07	2.28e-06	DOWN
NFIA	9.7959	10.5163	-0.720355	0.606948	1.07e-13	1.38e-12	DOWN
NFIC	9.44993	9.9149	-0.464971	0.724486	2.67e-08	1.28e-07	DOWN
NHLRC2	6.59737	7.29757	-0.700202	0.615486	5.61e-17	1.53e-15	DOWN
NHS	7.0966	7.52303	-0.426428	0.744102	2.51e-05	7.37e-05	DOWN
NHSL2	4.56019	5.66729	-1.1071	0.464227	6.27e-17	1.69e-15	DOWN
NID1	10.6781	11.1686	-0.490435	0.71181	1.58e-07	6.67e-07	DOWN
NID2	9.26141	9.7114	-0.449987	0.73205	2.22e-05	6.58e-05	DOWN
NIN	9.8957	10.2937	-0.397983	0.758918	2.83e-11	2.27e-10	DOWN
NIPAL2	6.72144	7.45382	-0.732378	0.601911	3.9e-10	2.53e-09	DOWN
NIPBL	10.6218	11.0592	-0.437473	0.738427	7.93e-17	2.07e-15	DOWN
NKAIN1	7.21267	8.14469	-0.932026	0.524122	0.000258415	0.000639848	DOWN
NKX3-1	6.77837	7.3384	-0.560027	0.67829	0.000387964	0.00093362	DOWN
NLGN1	1.92828	2.58133	-0.653043	0.635938	1.46e-06	5.3e-06	DOWN
NLGN4X	5.19769	6.02422	-0.826521	0.563887	2.84e-06	9.77e-06	DOWN
NLRP12	2.93541	3.29957	-0.364162	0.77692	0.000364669	0.000880887	DOWN
NOS1AP	5.60697	6.49997	-0.893003	0.538492	2.06e-09	1.18e-08	DOWN
NOSTRIN	7.40073	8.36905	-0.968323	0.5111	5.1e-10	3.24e-09	DOWN
NOTCH2	11.933	12.3682	-0.435227	0.739577	2.68e-11	2.15e-10	DOWN
NOVA1	5.75322	6.8908	-1.13758	0.454522	1.07e-07	4.65e-07	DOWN
NPAT	8.30666	8.79806	-0.491404	0.711332	5.3e-16	1.14e-14	DOWN
NPEPPS	10.8887	11.2477	-0.359034	0.779687	1.06e-10	7.61e-10	DOWN
NPFFR2	1.58299	2.083	-0.50001	0.707102	0.000197598	0.000498587	DOWN
NPNT	10.2763	11.2617	-0.985423	0.505078	1.82e-08	8.95e-08	DOWN
NPTN	10.9098	11.2463	-0.336461	0.791982	4.64e-11	3.56e-10	DOWN
NR1D2	9.63495	10.0781	-0.4432	0.735501	5.19e-14	7.15e-13	DOWN
NR2C2	9.36774	9.86676	-0.499013	0.707591	1.53e-09	8.95e-09	DOWN
NR2F1	6.50539	7.18385	-0.67846	0.624832	7.27e-06	2.34e-05	DOWN
NR2F2	10.098	10.6268	-0.528791	0.693135	1.37e-07	5.86e-07	DOWN
NR3C1	9.64074	10.0499	-0.409119	0.753083	1.84e-09	1.06e-08	DOWN
NR3C2	6.30188	6.76967	-0.467785	0.723074	0.000167195	0.00042726	DOWN
NR4A2	7.8769	8.49837	-0.621472	0.650008	6.86e-07	2.64e-06	DOWN
NR5A2	5.36798	6.06792	-0.699938	0.615599	3.94e-13	4.54e-12	DOWN
NRIP1	10.571	11.2529	-0.681882	0.623352	8.19e-13	8.88e-12	DOWN
NRK	5.00052	5.81729	-0.816765	0.567713	5.16e-06	1.7e-05	DOWN
NRP1	10.4558	10.9399	-0.484068	0.714959	2.02e-09	1.16e-08	DOWN
NRXN3	4.46266	5.46226	-0.999599	0.500139	5.01e-10	3.19e-09	DOWN
NSD1	10.8008	11.1696	-0.36879	0.774431	1.03e-13	1.33e-12	DOWN
NTN4	9.45867	10.6692	-1.21049	0.43212	7.33e-15	1.19e-13	DOWN
NTRK2	8.1713	9.10234	-0.931038	0.524481	4.85e-08	2.23e-07	DOWN
NTRK3	4.45661	5.20178	-0.745167	0.596599	0.000148889	0.000384533	DOWN
NUAK1	8.54438	9.04599	-0.50161	0.706318	2.09e-08	1.02e-07	DOWN
NUBPL	7.83984	8.1948	-0.354967	0.781888	8.65e-12	7.63e-11	DOWN
NUCB2	10.8764	11.3164	-0.440009	0.73713	9.92e-07	3.71e-06	DOWN
NUDT12	8.03484	8.7433	-0.708454	0.611976	3.21e-15	5.69e-14	DOWN
NUDT4	9.53162	9.88333	-0.351709	0.783655	2.11e-08	1.03e-07	DOWN
OCLM	1.69015	2.04854	-0.358388	0.780035	1.76e-06	6.28e-06	DOWN
OCLN	8.14465	8.75638	-0.611738	0.654408	3.6e-09	1.98e-08	DOWN
OGN	6.6916	7.56366	-0.872064	0.546365	1.5e-05	4.59e-05	DOWN
OLFML1	7.26228	7.8076	-0.545314	0.685242	1.3e-07	5.58e-07	DOWN
OMD	6.30095	7.20541	-0.904455	0.534235	3.2e-07	1.3e-06	DOWN
OPHN1	7.78495	8.23299	-0.448044	0.733036	5.2e-09	2.79e-08	DOWN
OR2L13	0.601027	1.04795	-0.446924	0.733605	1.08e-06	4.02e-06	DOWN
OSBPL6	6.43771	6.90309	-0.465379	0.724281	0.000101	0.000268756	DOWN
OSBPL8	9.97993	10.7089	-0.728943	0.603346	3.29e-20	2.28e-18	DOWN
OSMR	8.89823	9.6221	-0.723872	0.60547	4.48e-10	2.88e-09	DOWN
OTUD4	9.70082	10.0821	-0.381287	0.767752	2.92e-11	2.33e-10	DOWN
OTUD7B	10.1355	10.512	-0.376505	0.770301	2.63e-12	2.58e-11	DOWN
OXR1	9.71034	10.0766	-0.366248	0.775798	2.09e-08	1.02e-07	DOWN
P2RX7	5.39696	5.96081	-0.563848	0.676496	1.07e-05	3.35e-05	DOWN
P2RY12	3.27134	3.88755	-0.616207	0.652384	9.53e-06	3.01e-05	DOWN
P2RY13	5.60906	6.09935	-0.490296	0.711879	5.61e-05	0.000155381	DOWN
P2RY14	4.49591	4.97108	-0.475168	0.719383	4.36e-05	0.000123158	DOWN
P2RY1	3.24262	3.98004	-0.737419	0.599811	1.12e-11	9.72e-11	DOWN
P2RY4	0.882831	1.27366	-0.390829	0.762691	3.25e-07	1.31e-06	DOWN
PABPC5	3.83497	4.36583	-0.530869	0.692138	7.43e-07	2.83e-06	DOWN
PAFAH1B2	8.05337	8.80668	-0.753314	0.593239	8.56e-20	5.12e-18	DOWN
PAIP2B	7.11352	7.44499	-0.331462	0.794731	0.000157944	0.000405546	DOWN
PAK2	11.3153	11.6566	-0.34126	0.789351	3.48e-14	4.93e-13	DOWN
PALLD	11.7423	12.1143	-0.371943	0.772741	7.19e-06	2.31e-05	DOWN
PAMR1	5.88272	6.35329	-0.47057	0.72168	0.000149849	0.000386722	DOWN
PAN3	9.7531	10.0784	-0.325345	0.798107	3.27e-09	1.81e-08	DOWN
PANK3	9.23323	9.81452	-0.581291	0.668365	5.81e-13	6.45e-12	DOWN
PAPOLG	8.18617	8.5517	-0.365528	0.776185	4.61e-15	7.89e-14	DOWN
PAPPA2	1.14614	1.56453	-0.418393	0.748258	3.1e-05	8.96e-05	DOWN
PAPPA	5.55008	6.18401	-0.633934	0.644417	1.14e-08	5.79e-08	DOWN
PARD3B	4.99549	5.9531	-0.957618	0.514907	3.46e-13	4.02e-12	DOWN
PARD6B	8.5393	9.25484	-0.715538	0.608978	1.69e-08	8.37e-08	DOWN
PARP11	7.6317	8.06984	-0.438141	0.738085	2.85e-09	1.59e-08	DOWN
PARVA	10.4187	10.8408	-0.422096	0.74634	2.08e-17	6.32e-16	DOWN
PAX9	6.02186	6.6759	-0.654039	0.635499	0.000159673	0.000409558	DOWN
PBRM1	10.0992	10.5737	-0.474553	0.71969	8.55e-18	2.87e-16	DOWN
PBX1	11.9358	12.5318	-0.595981	0.661594	4.12e-12	3.89e-11	DOWN
PBX3	8.42449	8.90001	-0.475518	0.719209	1.83e-07	7.67e-07	DOWN
PCCA	7.95841	8.28629	-0.327878	0.796707	3.44e-07	1.38e-06	DOWN
PCDH1	10.4417	10.8269	-0.385235	0.765654	2.06e-08	1.01e-07	DOWN
PCDH17	7.06064	7.54447	-0.483833	0.715075	3.8e-06	1.28e-05	DOWN
PCDH18	8.04685	8.61801	-0.571164	0.673073	2.91e-08	1.39e-07	DOWN
PCDH19	5.49691	6.26217	-0.765257	0.588348	2.8e-08	1.34e-07	DOWN
PCDH20	3.36694	4.2057	-0.838765	0.559122	7.81e-07	2.97e-06	DOWN
PCDH7	7.60362	8.42393	-0.820307	0.566322	1.54e-10	1.07e-09	DOWN
PCDHA3	4.09314	4.68885	-0.595707	0.66172	0.000181051	0.000460208	DOWN
PCDHA4	4.21253	5.02365	-0.811116	0.569941	5.04e-05	0.000140886	DOWN
PCDHA6	4.25639	5.22236	-0.965969	0.511934	5.19e-06	1.71e-05	DOWN
PCDHAC2	3.75042	4.49731	-0.74689	0.595887	4.34e-07	1.71e-06	DOWN
PCDHB11	3.78082	4.30028	-0.519459	0.697633	8.71e-06	2.76e-05	DOWN
PCDHB13	5.22776	5.57666	-0.348896	0.785185	0.000219386	0.000549375	DOWN
PCDHGA10	5.22491	5.86233	-0.637421	0.642861	0.000370705	0.000894714	DOWN
PCDHGA12	4.9893	5.58329	-0.593992	0.662507	5.06e-05	0.00014133	DOWN
PCDHGA2	4.11664	4.88305	-0.766407	0.58788	2.56e-07	1.05e-06	DOWN
PCDHGA3	3.19566	3.69173	-0.496075	0.709033	1.97e-05	5.9e-05	DOWN
PCDHGA4	4.13369	4.85982	-0.726132	0.604523	3.43e-07	1.38e-06	DOWN
PCDHGA5	3.8578	4.50354	-0.645734	0.639167	8.78e-07	3.31e-06	DOWN
PCDHGA6	4.02218	4.65734	-0.635161	0.643869	5.69e-07	2.22e-06	DOWN
PCDHGA7	3.67748	4.20218	-0.524701	0.695103	8.23e-05	0.000222156	DOWN
PCDHGA9	4.31442	5.05621	-0.741794	0.597995	3.8e-08	1.77e-07	DOWN
PCDHGB2	4.50586	5.0871	-0.581235	0.668392	0.000128593	0.000336253	DOWN
PCDHGB3	2.83268	3.35931	-0.526625	0.694177	3.2e-05	9.23e-05	DOWN
PCDHGB6	4.59793	5.32312	-0.72519	0.604918	1.49e-07	6.33e-07	DOWN
PCDHGB7	5.59013	6.6216	-1.03146	0.489214	3.18e-12	3.06e-11	DOWN
PCDHGC5	2.53153	2.951	-0.419466	0.747701	0.000389376	0.000936494	DOWN
PCGF5	9.63302	9.98334	-0.350324	0.784408	2.46e-09	1.39e-08	DOWN
PCK1	2.55506	3.5415	-0.986444	0.50472	2.24e-05	6.64e-05	DOWN
PCLO	7.38738	8.16453	-0.777146	0.58352	7e-12	6.28e-11	DOWN
PCM1	11.1029	11.7392	-0.636387	0.643322	3.13e-19	1.57e-17	DOWN
PCSK5	5.58803	6.20788	-0.61985	0.650739	1.59e-06	5.72e-06	DOWN
PCSK6	8.92934	9.66513	-0.735787	0.600491	4.07e-07	1.62e-06	DOWN
PCYOX1	10.9603	11.4305	-0.470232	0.721848	1.47e-17	4.63e-16	DOWN
PDCD4	11.9247	12.3554	-0.430649	0.741928	1.25e-06	4.6e-06	DOWN
PDCD6IP	11.5589	11.9052	-0.34624	0.786632	2.9e-17	8.52e-16	DOWN
PDE10A	5.99998	6.65594	-0.655961	0.634653	9.6e-09	4.94e-08	DOWN
PDE11A	3.87152	4.68207	-0.810551	0.570164	5.32e-08	2.43e-07	DOWN
PDE1A	4.86956	5.70064	-0.831084	0.562107	3.55e-12	3.39e-11	DOWN
PDE1C	3.08312	3.61454	-0.531421	0.691873	0.000145668	0.000376836	DOWN
PDE2A	6.58565	6.97604	-0.390391	0.762923	0.000305384	0.000747541	DOWN
PDE3A	4.41909	5.45214	-1.03305	0.488677	1.43e-11	1.21e-10	DOWN
PDE4A	8.40729	8.7449	-0.337603	0.791355	0.000146232	0.000378182	DOWN
PDE4D	7.15679	7.51713	-0.360337	0.778982	0.000386556	0.000930362	DOWN
PDE5A	8.00845	8.50561	-0.497153	0.708503	3.52e-05	0.000100686	DOWN
PDE8B	5.04824	5.85641	-0.808172	0.571105	1.11e-06	4.11e-06	DOWN
PDGFC	8.56816	9.12607	-0.557913	0.679284	2.72e-09	1.52e-08	DOWN
PDGFD	7.91152	8.63584	-0.724314	0.605285	2.89e-12	2.81e-11	DOWN
PDGFRA	9.36149	9.92788	-0.566388	0.675305	3.45e-07	1.39e-06	DOWN
PDGFRB	11.4024	11.8085	-0.406036	0.754694	5.53e-05	0.000153289	DOWN
PDIK1L	8.62134	8.98543	-0.364088	0.77696	6.43e-11	4.8e-10	DOWN
PDK4	8.28447	9.23049	-0.946016	0.519064	2.47e-09	1.39e-08	DOWN
PDLIM5	11.0166	11.583	-0.566394	0.675302	3.6e-12	3.44e-11	DOWN
PDP1	9.32981	9.66893	-0.339121	0.790523	2.13e-05	6.33e-05	DOWN
PDP2	6.34571	6.85959	-0.513873	0.70034	1.05e-12	1.12e-11	DOWN
PDPK1	10.0892	10.6071	-0.517887	0.698394	2.58e-17	7.71e-16	DOWN
PDPR	8.94003	9.46676	-0.526721	0.69413	2.25e-11	1.83e-10	DOWN
PDS5B	9.55432	10.0575	-0.503187	0.705547	1.35e-21	1.43e-19	DOWN
PDZD2	7.93109	8.48978	-0.558685	0.67892	5.44e-07	2.12e-06	DOWN
PDZD8	7.95507	8.68893	-0.733865	0.601291	8.09e-20	4.89e-18	DOWN
PDZK1	5.81112	6.77532	-0.964199	0.512563	0.000288905	0.00070922	DOWN
PDZRN4	2.95552	3.66578	-0.710256	0.611212	2.87e-05	8.34e-05	DOWN
PEBP4	2.02779	2.68538	-0.657591	0.633936	0.000206135	0.000518759	DOWN
PELI2	6.37162	7.00535	-0.633731	0.644508	1.02e-09	6.16e-09	DOWN
PER2	9.04739	9.49856	-0.451168	0.73145	2.01e-10	1.37e-09	DOWN
PER3	8.65175	9.35955	-0.707805	0.612251	1.61e-15	3.1e-14	DOWN
PEX11A	7.60541	8.12187	-0.51646	0.699085	5.45e-09	2.91e-08	DOWN
PEX12	7.48071	7.90547	-0.424762	0.744962	1.38e-11	1.17e-10	DOWN
PEX1	8.92528	9.25206	-0.326785	0.797311	8.67e-09	4.49e-08	DOWN
PFKFB3	10.5758	10.9582	-0.382388	0.767167	1.51e-05	4.61e-05	DOWN
PGGT1B	8.53503	9.01681	-0.481781	0.716093	2.16e-21	2.14e-19	DOWN
PGM5	5.86902	6.50404	-0.635021	0.643932	1.39e-05	4.27e-05	DOWN
PGR	7.52527	9.40607	-1.8808	0.271533	1.71e-10	1.18e-09	DOWN
PHACTR2	8.65353	9.14692	-0.493395	0.710352	3.26e-11	2.58e-10	DOWN
PHC3	10.0296	10.5254	-0.495751	0.709192	6.69e-19	3.01e-17	DOWN
PHF20	10.1699	10.6132	-0.443309	0.735446	2.85e-21	2.67e-19	DOWN
PHF3	10.531	11.0185	-0.487558	0.713231	9.82e-19	4.19e-17	DOWN
PHF6	9.29878	9.64667	-0.347889	0.785733	5.01e-08	2.3e-07	DOWN
PHIP	10.2467	10.6869	-0.44021	0.737028	1.14e-14	1.78e-13	DOWN
PHLDB2	8.4452	9.1245	-0.679298	0.624469	3.91e-10	2.54e-09	DOWN
PHOSPHO2	6.13203	6.51602	-0.383996	0.766312	1.23e-06	4.53e-06	DOWN
PHYHD1	6.9121	7.74297	-0.830862	0.562193	3.3e-05	9.49e-05	DOWN
PIBF1	8.25456	8.57919	-0.324633	0.798501	4.56e-09	2.46e-08	DOWN
PIGK	9.34873	9.78036	-0.431626	0.741426	2.25e-18	8.78e-17	DOWN
PIH1D2	4.53744	5.12537	-0.587929	0.665297	2.43e-10	1.64e-09	DOWN
PIK3C2A	9.83526	10.5008	-0.665553	0.630447	2.31e-22	3.23e-20	DOWN
PIK3CA	8.62306	9.0347	-0.411646	0.751765	1.52e-11	1.28e-10	DOWN
PIK3CG	5.65372	6.28643	-0.632711	0.644964	1.89e-06	6.71e-06	DOWN
PIK3R1	10.643	11.3105	-0.667446	0.62962	3.43e-11	2.71e-10	DOWN
PIK3R3	11.071	11.4062	-0.33513	0.792713	1.34e-05	4.13e-05	DOWN
PIK3R4	9.5368	9.91088	-0.374079	0.771598	8.02e-17	2.09e-15	DOWN
PIKFYVE	8.9923	9.45712	-0.464824	0.724559	1.46e-13	1.83e-12	DOWN
PIWIL2	1.86293	2.55055	-0.687626	0.620875	2.2e-09	1.25e-08	DOWN
PJA2	10.8214	11.5015	-0.680052	0.624143	5.35e-26	3.54e-23	DOWN
PKD2	8.48658	9.00855	-0.521971	0.69642	4.73e-10	3.02e-09	DOWN
PKDREJ	2.42884	2.93477	-0.505922	0.70421	1.04e-07	4.53e-07	DOWN
PKIB	8.45371	9.26241	-0.808698	0.570897	8.46e-08	3.74e-07	DOWN
PKN2	9.7817	10.1519	-0.370191	0.77368	4.07e-11	3.16e-10	DOWN
PKP2	8.33976	8.6661	-0.326336	0.79756	3.86e-05	0.000109809	DOWN
PLA2G12A	9.66711	10.1137	-0.446548	0.733796	1.62e-13	2.01e-12	DOWN
PLA2R1	7.1932	8.00362	-0.810416	0.570217	1.74e-19	9.45e-18	DOWN
PLAG1	4.18009	4.53084	-0.350753	0.784174	0.000302392	0.000740639	DOWN
PLCB1	7.15789	7.74424	-0.586353	0.666024	5.98e-05	0.000164886	DOWN
PLCL1	6.74574	7.53148	-0.785742	0.580053	3.71e-09	2.03e-08	DOWN
PLCXD3	2.79552	3.68408	-0.888551	0.540156	3.32e-07	1.34e-06	DOWN
PLEKHA5	8.86233	9.22645	-0.36412	0.776943	8.33e-08	3.69e-07	DOWN
PLEKHF2	10.1838	10.6723	-0.48853	0.712751	3.6e-10	2.35e-09	DOWN
PLEKHH2	6.3016	6.81953	-0.517925	0.698376	2.26e-05	6.69e-05	DOWN
PLEKHM3	7.49666	7.89448	-0.397819	0.759005	3.53e-08	1.66e-07	DOWN
PLIN1	6.39705	7.24544	-0.848391	0.555404	0.000413141	0.00098909	DOWN
PLK2	10.5362	11.0128	-0.47663	0.718654	8.83e-08	3.89e-07	DOWN
PLN	5.23611	5.85712	-0.62101	0.650216	2.65e-06	9.17e-06	DOWN
PLS1	7.38855	8.0623	-0.673749	0.626875	3.1e-11	2.47e-10	DOWN
PLSCR4	7.7713	8.50882	-0.737524	0.599768	7.69e-15	1.24e-13	DOWN
PLXDC2	9.11505	9.5302	-0.415147	0.749943	2.33e-06	8.14e-06	DOWN
PLXNC1	6.98977	8.0958	-1.10603	0.464571	4.68e-11	3.58e-10	DOWN
PNMA2	5.77299	6.44251	-0.669517	0.628717	1.28e-06	4.7e-06	DOWN
POC1B	8.33272	8.6962	-0.363479	0.777288	7.08e-13	7.78e-12	DOWN
PODN	9.18776	9.80714	-0.619375	0.650953	0.000161213	0.000413015	DOWN
POLI	8.79365	9.21259	-0.418946	0.747971	1.13e-09	6.75e-09	DOWN
POLK	8.1894	8.81521	-0.625807	0.648057	5.13e-22	6.22e-20	DOWN
POSTN	13.3366	14.0256	-0.688981	0.620292	3.21e-07	1.3e-06	DOWN
POU2F1	6.48923	6.98129	-0.492061	0.711009	1.23e-12	1.29e-11	DOWN
PPAN-P2RY11	3.69802	4.88147	-1.18345	0.440298	5.9e-07	2.29e-06	DOWN
PPFIA2	2.16948	2.83867	-0.669199	0.628856	1.16e-09	6.92e-09	DOWN
PPFIBP1	9.84012	10.2001	-0.360014	0.779157	5.88e-08	2.66e-07	DOWN
PPIL3	7.662	8.0601	-0.398104	0.758855	6.45e-17	1.73e-15	DOWN
PPIP5K1	8.86581	9.21595	-0.350142	0.784507	6.16e-07	2.38e-06	DOWN
PPIP5K2	9.36972	9.89101	-0.521293	0.696747	1.21e-19	6.92e-18	DOWN
PPM1A	10.4453	10.8048	-0.359476	0.779448	2.85e-15	5.11e-14	DOWN
PPM1H	9.34286	9.71022	-0.367359	0.7752	5.02e-05	0.000140372	DOWN
PPM1L	5.46876	5.92768	-0.458919	0.727531	1.87e-06	6.65e-06	DOWN
PPP1R12A	9.96942	10.3735	-0.404119	0.755698	2.73e-16	6.24e-15	DOWN
PPP1R12B	9.38176	9.79798	-0.416218	0.749386	1.56e-09	9.11e-09	DOWN
PPP1R3B	9.98998	10.3999	-0.409918	0.752666	3.04e-07	1.23e-06	DOWN
PPP1R3C	7.15049	8.09234	-0.941857	0.520562	2.69e-08	1.29e-07	DOWN
PPP1R9A	8.089	8.61694	-0.52793	0.693549	1.67e-05	5.06e-05	DOWN
PPP2R3A	8.72245	9.04477	-0.32232	0.799782	0.000136395	0.000355089	DOWN
PPP2R5E	9.194	9.68005	-0.486052	0.713976	6.04e-20	3.81e-18	DOWN
PPP3CA	9.97463	10.3347	-0.360045	0.77914	3.31e-08	1.56e-07	DOWN
PPP4R2	8.25731	8.95975	-0.702446	0.614529	7.09e-19	3.18e-17	DOWN
PPTC7	7.74132	8.41571	-0.674398	0.626594	5.61e-13	6.25e-12	DOWN
PRCP	10.9789	11.3564	-0.377463	0.76979	2.9e-10	1.92e-09	DOWN
PRDM2	9.88646	10.2771	-0.390654	0.762784	6.27e-14	8.5e-13	DOWN
PRDM5	4.31877	4.75965	-0.440875	0.736688	1.96e-05	5.87e-05	DOWN
PREPL	10.2534	10.7543	-0.500924	0.706654	2.6e-20	1.89e-18	DOWN
PREX1	11.067	11.6039	-0.53691	0.689246	2.1e-05	6.25e-05	DOWN
PREX2	3.70654	5.21267	-1.50613	0.352055	2.15e-19	1.13e-17	DOWN
PRG4	4.80671	5.64368	-0.836965	0.55982	2.51e-05	7.37e-05	DOWN
PRICKLE2	8.4388	9.19485	-0.756049	0.592116	2.24e-15	4.16e-14	DOWN
PRINS	1.98401	2.36761	-0.383595	0.766525	1.43e-05	4.38e-05	DOWN
PRKAA2	6.5786	7.57	-0.991399	0.50299	2.47e-09	1.39e-08	DOWN
PRKACB	9.37909	9.89762	-0.518526	0.698085	9.32e-06	2.94e-05	DOWN
PRKAR1A	12.1982	12.5785	-0.380391	0.768229	7.83e-13	8.52e-12	DOWN
PRKAR2A	7.39266	8.2876	-0.894948	0.537767	9.06e-18	3e-16	DOWN
PRKCH	9.04041	9.38085	-0.340442	0.789799	1.26e-05	3.89e-05	DOWN
PRKD1	6.1983	6.55535	-0.357043	0.780763	7.41e-05	0.00020157	DOWN
PRKG1	4.7333	5.93231	-1.19902	0.435572	9.4e-15	1.5e-13	DOWN
PRKG2	2.60771	3.59382	-0.986109	0.504837	5.65e-13	6.29e-12	DOWN
PRLR	10.972	12.0074	-1.03532	0.487908	1.04e-16	2.63e-15	DOWN
PRND	4.41235	5.49722	-1.08486	0.471436	2.05e-11	1.68e-10	DOWN
PROS1	8.1915	8.6199	-0.428403	0.743084	3.71e-06	1.25e-05	DOWN
PRPH2	3.39684	4.01262	-0.615783	0.652576	2.08e-07	8.65e-07	DOWN
PRRC1	10.7392	11.1802	-0.440997	0.736625	5.88e-21	5.01e-19	DOWN
PRSS21	2.4637	3.67578	-1.21208	0.431647	7.07e-10	4.39e-09	DOWN
PRSS23	11.3258	11.8817	-0.555902	0.680232	1.86e-06	6.62e-06	DOWN
PRSS35	2.20817	2.82956	-0.621394	0.650043	1.62e-09	9.43e-09	DOWN
PRTG	4.91621	5.59458	-0.678376	0.624868	1.17e-06	4.32e-06	DOWN
PRUNE2	6.23982	6.93693	-0.697114	0.616805	7.99e-11	5.86e-10	DOWN
PSD3	8.73427	9.7186	-0.984325	0.505462	1.63e-11	1.36e-10	DOWN
PSG4	0.997259	1.71304	-0.71578	0.608876	2.91e-07	1.19e-06	DOWN
PTAFR	5.93211	6.40754	-0.475431	0.719252	0.000371833	0.000897059	DOWN
PTAR1	9.34623	9.75517	-0.408934	0.75318	2.75e-11	2.21e-10	DOWN
PTCD2	6.80186	7.14668	-0.344816	0.787408	5.75e-12	5.26e-11	DOWN
PTEN	10.5037	10.8808	-0.377137	0.769964	1.67e-14	2.52e-13	DOWN
PTENP1	7.67786	8.00315	-0.325292	0.798137	2.17e-09	1.24e-08	DOWN
PTER	8.40128	8.87461	-0.473335	0.720298	1.09e-14	1.72e-13	DOWN
PTGER3	7.87139	8.69104	-0.819649	0.56658	3.87e-06	1.3e-05	DOWN
PTGS1	8.25444	8.62075	-0.366306	0.775766	2.94e-06	1.01e-05	DOWN
PTP4A2	11.5059	11.9062	-0.400319	0.757691	1.21e-13	1.55e-12	DOWN
PTPN11	11.08	11.4874	-0.407354	0.754005	2.13e-13	2.57e-12	DOWN
PTPN13	9.04279	9.67796	-0.635171	0.643865	1.45e-08	7.25e-08	DOWN
PTPN21	7.94012	8.37315	-0.433031	0.740704	3.86e-07	1.54e-06	DOWN
PTPN5	1.62773	1.97516	-0.347428	0.785984	0.000242051	0.000601667	DOWN
PTPRB	8.15691	9.0697	-0.91279	0.531157	2.32e-17	7.02e-16	DOWN
PTPRD	6.30727	6.93655	-0.629282	0.646498	1.62e-05	4.92e-05	DOWN
PTPRG	8.0965	8.9415	-0.844997	0.556712	1.14e-13	1.46e-12	DOWN
PTPRM	9.10775	9.53268	-0.424936	0.744872	2.02e-06	7.14e-06	DOWN
PTPRN2	6.59708	7.3498	-0.752718	0.593484	2.43e-05	7.16e-05	DOWN
PTPRR	2.91313	3.31632	-0.403196	0.756181	0.000165072	0.000422085	DOWN
PTPRT	6.6071	8.34276	-1.73566	0.300271	7.66e-10	4.73e-09	DOWN
PURA	7.95551	8.2838	-0.328288	0.796481	5.48e-13	6.11e-12	DOWN
PUS7L	7.29883	7.80115	-0.502319	0.705971	2.84e-16	6.47e-15	DOWN
PWWP2A	8.32724	8.65915	-0.331903	0.794488	2.93e-15	5.24e-14	DOWN
PXDNL	4.16331	4.81396	-0.650641	0.636997	4.5e-06	1.5e-05	DOWN
PXK	7.12694	7.74287	-0.615927	0.65251	1.39e-14	2.14e-13	DOWN
PXMP4	8.97097	9.41361	-0.44264	0.735787	0.000217739	0.000545647	DOWN
PYGO1	2.86998	3.45201	-0.582027	0.668025	1.1e-05	3.43e-05	DOWN
RAB11FIP2	8.18373	8.58351	-0.399783	0.757972	8.73e-16	1.78e-14	DOWN
RAB19	3.18906	3.95325	-0.764192	0.588783	4.7e-10	3e-09	DOWN
RAB27B	6.05101	7.30038	-1.24937	0.420632	7.13e-19	3.18e-17	DOWN
RAB30	6.69181	7.68087	-0.989058	0.503807	3.82e-14	5.37e-13	DOWN
RAB31	11.1151	11.5374	-0.422283	0.746243	7.78e-06	2.49e-05	DOWN
RAB33B	7.90392	8.34025	-0.436327	0.739014	3.31e-15	5.84e-14	DOWN
RAB3GAP1	10.2565	10.5933	-0.336723	0.791838	7e-14	9.39e-13	DOWN
RAB3GAP2	10.039	10.4763	-0.437263	0.738534	1.33e-15	2.62e-14	DOWN
RAB6C	6.32948	6.71843	-0.388942	0.763689	7.45e-06	2.39e-05	DOWN
RAB8B	8.82676	9.22238	-0.395625	0.76016	1.4e-09	8.23e-09	DOWN
RABEP1	10.9535	11.6192	-0.66568	0.630392	9.89e-15	1.57e-13	DOWN
RABL3	9.07776	9.48266	-0.404901	0.755288	1.35e-17	4.31e-16	DOWN
RAD50	10.0186	10.6223	-0.603706	0.658061	4.54e-22	5.54e-20	DOWN
RAD54L2	6.63433	7.3542	-0.719868	0.607153	4.34e-12	4.08e-11	DOWN
RAG1	3.9862	4.49421	-0.508012	0.703191	6.34e-09	3.36e-08	DOWN
RAI2	7.60702	8.46356	-0.856542	0.552275	3.51e-09	1.93e-08	DOWN
RALGAPA1	8.75885	9.32134	-0.562496	0.67713	5.8e-17	1.57e-15	DOWN
RALGAPA2	7.30979	8.52205	-1.21226	0.431591	1.12e-19	6.45e-18	DOWN
RALGAPB	10.8616	11.2708	-0.409174	0.753054	2.32e-14	3.43e-13	DOWN
RALGPS2	9.05482	9.95002	-0.895195	0.537674	2.15e-15	4.04e-14	DOWN
RANBP2	11.2683	11.6485	-0.380195	0.768334	2.58e-15	4.71e-14	DOWN
RANBP6	9.04824	9.42447	-0.376228	0.77045	5.36e-13	5.99e-12	DOWN
RAP2C	9.79368	10.1782	-0.384475	0.766058	3.21e-10	2.11e-09	DOWN
RAPGEF2	8.97032	9.32377	-0.353449	0.782711	1.61e-08	8e-08	DOWN
RAPGEF4	6.66158	7.35115	-0.689564	0.620041	2.87e-10	1.91e-09	DOWN
RAPGEF5	8.83901	9.24801	-0.409002	0.753144	3.6e-07	1.44e-06	DOWN
RAPGEF6	7.2729	8.33113	-1.05823	0.480221	4.82e-18	1.73e-16	DOWN
RAPH1	10.1336	10.5727	-0.43909	0.7376	4.79e-10	3.06e-09	DOWN
RASA1	9.55932	10.1018	-0.542464	0.686597	1.16e-15	2.31e-14	DOWN
RASA2	6.25466	6.92042	-0.665757	0.630358	1.94e-07	8.11e-07	DOWN
RASEF	6.90943	8.33855	-1.42912	0.371357	9.82e-16	1.98e-14	DOWN
RASGRF2	6.09165	6.78706	-0.695404	0.617536	1.62e-09	9.43e-09	DOWN
RASSF3	7.12313	7.85521	-0.732073	0.602038	1.88e-09	1.08e-08	DOWN
RASSF6	5.59778	6.43405	-0.83627	0.56009	3.24e-08	1.53e-07	DOWN
RASSF8	7.9588	8.76709	-0.808294	0.571057	8.38e-13	9.07e-12	DOWN
RB1	9.39125	10.0994	-0.708157	0.612102	2.95e-21	2.73e-19	DOWN
RB1CC1	10.409	10.7432	-0.334138	0.793258	2.32e-06	8.11e-06	DOWN
RBAK	8.90654	9.24474	-0.338201	0.791027	8.33e-13	9.02e-12	DOWN
RBBP5	8.92189	9.44867	-0.526783	0.694101	3.02e-14	4.35e-13	DOWN
RBBP8	9.71299	10.1238	-0.410845	0.752183	7.64e-07	2.91e-06	DOWN
RBL2	10.3914	10.7693	-0.377896	0.769559	6.79e-10	4.23e-09	DOWN
RBM11	4.87687	5.40277	-0.525904	0.694524	6.66e-05	0.000182379	DOWN
RBM26	9.3263	9.68103	-0.354724	0.782019	4.67e-15	7.98e-14	DOWN
RBM27	9.48188	9.97066	-0.488783	0.712626	4.52e-25	1.99e-22	DOWN
RBM43	7.50608	8.02373	-0.517645	0.698511	7.79e-11	5.73e-10	DOWN
RBM47	10.8055	11.3008	-0.495393	0.709368	5.57e-10	3.51e-09	DOWN
RBMS3	4.23256	5.03872	-0.806154	0.571905	7.31e-12	6.53e-11	DOWN
RC3H1	9.38402	9.73261	-0.34859	0.785351	6.97e-15	1.14e-13	DOWN
RC3H2	8.00518	8.64428	-0.639102	0.642113	4.07e-14	5.7e-13	DOWN
RCAN2	7.44648	7.84662	-0.400145	0.757782	2.98e-06	1.02e-05	DOWN
RCBTB1	9.00038	9.3685	-0.368125	0.774789	4.34e-10	2.79e-09	DOWN
RD3	0.782521	1.25153	-0.469009	0.722461	7.2e-08	3.22e-07	DOWN
RECK	7.61713	8.01379	-0.396666	0.759612	2.21e-05	6.56e-05	DOWN
REEP3	8.94755	9.35427	-0.406715	0.754339	1.86e-10	1.27e-09	DOWN
REEP6	8.86677	9.57887	-0.712103	0.61043	0.000201761	0.00050842	DOWN
REL	5.95247	6.80926	-0.856793	0.552178	2.04e-13	2.47e-12	DOWN
REPS2	8.95404	9.85674	-0.902702	0.534884	4.37e-13	4.98e-12	DOWN
RERG	9.23852	9.92175	-0.683238	0.622766	0.000352013	0.000852589	DOWN
RERGL	2.52477	3.33304	-0.808267	0.571067	5.1e-06	1.68e-05	DOWN
REST	7.41186	8.4136	-1.00174	0.499396	8.41e-17	2.18e-15	DOWN
RET	8.10876	8.90523	-0.79647	0.575756	0.000172503	0.000439844	DOWN
REV3L	8.79728	9.17032	-0.373037	0.772155	2.37e-07	9.79e-07	DOWN
RFFL	9.17178	9.52252	-0.350749	0.784177	8.75e-14	1.15e-12	DOWN
RFPL1S	3.1554	3.9347	-0.779302	0.582649	8.62e-13	9.31e-12	DOWN
RFTN2	5.31494	5.79166	-0.476721	0.718609	1.29e-08	6.51e-08	DOWN
RFX3	5.40074	5.94977	-0.549035	0.683477	4.75e-07	1.87e-06	DOWN
RFX7	8.72872	9.21353	-0.484811	0.714591	1.92e-15	3.65e-14	DOWN
RGL1	8.4228	8.78323	-0.360434	0.77893	1.27e-05	3.92e-05	DOWN
RGMB	8.86866	9.29698	-0.428327	0.743123	1.2e-13	1.54e-12	DOWN
RGP1	6.79225	7.13881	-0.346555	0.78646	6.16e-06	2e-05	DOWN
RGPD1	7.64655	8.25638	-0.609825	0.655276	1.64e-10	1.14e-09	DOWN
RGPD3	7.4277	7.9623	-0.5346	0.69035	4.89e-13	5.51e-12	DOWN
RGPD4	6.74141	7.21353	-0.472117	0.720906	9.56e-18	3.14e-16	DOWN
RGPD5	5.04822	5.87553	-0.82731	0.563579	4.72e-11	3.61e-10	DOWN
RGS22	3.833	5.14191	-1.30891	0.403626	8.28e-09	4.31e-08	DOWN
RGS4	6.91789	7.44198	-0.524092	0.695397	0.000219111	0.000548766	DOWN
RGS5	10.3649	11.1999	-0.835016	0.560577	1.87e-13	2.28e-12	DOWN
RGS7BP	1.67858	2.45792	-0.77934	0.582633	1.68e-10	1.16e-09	DOWN
RHBDD1	7.9954	8.42642	-0.431022	0.741736	3.89e-18	1.43e-16	DOWN
RHBDL3	3.78731	4.54702	-0.759716	0.590612	1.03e-06	3.84e-06	DOWN
RHOBTB3	9.79486	10.2615	-0.466598	0.723669	1.9e-05	5.71e-05	DOWN
RHOJ	6.70414	7.1598	-0.455653	0.72918	3.63e-06	1.23e-05	DOWN
RHOT1	9.47614	9.8127	-0.336553	0.791931	1.38e-13	1.74e-12	DOWN
RICTOR	9.18397	9.66474	-0.480773	0.716594	6.19e-15	1.03e-13	DOWN
RIF1	9.15164	9.75881	-0.607174	0.656482	1.3e-12	1.36e-11	DOWN
RIMKLA	5.43261	6.20773	-0.775124	0.584339	4.7e-07	1.85e-06	DOWN
RIN2	10.2972	10.6978	-0.400603	0.757542	3.68e-10	2.4e-09	DOWN
RLF	8.99126	9.31523	-0.323967	0.79887	6.53e-10	4.07e-09	DOWN
RLIM	10.4075	10.7314	-0.323889	0.798914	6.45e-14	8.73e-13	DOWN
RMI1	8.31772	8.68505	-0.367331	0.775216	2.02e-08	9.87e-08	DOWN
RNASE4	9.53967	10.0736	-0.533925	0.690673	3.15e-08	1.49e-07	DOWN
RNASEL	8.13449	8.59958	-0.465085	0.724428	1.34e-13	1.69e-12	DOWN
RNF111	8.93106	9.37781	-0.446746	0.733696	2.42e-17	7.29e-16	DOWN
RNF125	7.26045	7.7639	-0.50345	0.705418	1.68e-09	9.77e-09	DOWN
RNF141	9.91525	10.3752	-0.459988	0.726992	5.54e-14	7.59e-13	DOWN
RNF150	4.82986	5.30234	-0.472476	0.720727	0.00014642	0.000378611	DOWN
RNF152	5.66666	6.17561	-0.508951	0.702733	2.57e-08	1.23e-07	DOWN
RNF168	6.99957	7.58124	-0.581673	0.668189	2.67e-10	1.78e-09	DOWN
RNF169	8.69644	9.27497	-0.578529	0.669646	2.54e-12	2.51e-11	DOWN
RNF180	5.85422	6.47325	-0.619033	0.651107	2.36e-09	1.33e-08	DOWN
RNF2	9.03076	9.43584	-0.405082	0.755193	8.99e-13	9.66e-12	DOWN
RNF6	9.47458	9.82348	-0.348902	0.785182	9.21e-11	6.7e-10	DOWN
ROBO1	8.81279	9.19614	-0.383343	0.766659	0.000278386	0.000685157	DOWN
ROBO2	3.58899	5.01745	-1.42846	0.371527	8.35e-09	4.34e-08	DOWN
ROCK1	10.0025	10.4954	-0.49294	0.710575	1.32e-13	1.67e-12	DOWN
ROCK2	8.9644	9.58316	-0.618761	0.65123	2.48e-09	1.39e-08	DOWN
ROPN1L	2.75832	3.34253	-0.58421	0.667014	5.41e-05	0.000150277	DOWN
ROR1	4.60215	5.25592	-0.653769	0.635618	2.77e-06	9.55e-06	DOWN
RORA	7.94785	8.32465	-0.376797	0.770145	1.08e-05	3.38e-05	DOWN
RORB	1.97941	2.6332	-0.653789	0.635609	1.14e-08	5.79e-08	DOWN
RP1	2.75465	3.58196	-0.827308	0.56358	3.83e-06	1.29e-05	DOWN
RP2	8.24558	8.74731	-0.501736	0.706257	4.65e-16	1.01e-14	DOWN
RPGR	7.04691	7.41421	-0.3673	0.775232	1.11e-09	6.65e-09	DOWN
RPGRIP1L	7.40828	7.76908	-0.360796	0.778735	5.23e-09	2.8e-08	DOWN
RPL23AP53	6.85651	7.21847	-0.361956	0.778109	1.89e-06	6.71e-06	DOWN
RPRD2	10.5558	10.9502	-0.394405	0.760803	8.05e-13	8.74e-12	DOWN
RPS15AP10	1.85742	2.30812	-0.450705	0.731685	6.96e-09	3.66e-08	DOWN
RPS28	5.64187	7.14508	-1.50321	0.352768	4.29e-06	1.43e-05	DOWN
RPS6KA5	7.04286	7.68217	-0.639303	0.642023	2e-12	2.02e-11	DOWN
RPS6KA6	4.17959	5.09681	-0.91722	0.529528	1.76e-08	8.69e-08	DOWN
RRAGC	8.05989	8.44445	-0.384554	0.766016	1.11e-07	4.81e-07	DOWN
RREB1	9.73504	10.1748	-0.439732	0.737272	1.12e-09	6.7e-09	DOWN
RRM2B	9.59568	10.0161	-0.420386	0.747225	1.03e-10	7.43e-10	DOWN
RSBN1	8.84824	9.2328	-0.384564	0.76601	2.48e-18	9.59e-17	DOWN
RSBN1L	8.57432	8.98542	-0.4111	0.75205	5.5e-15	9.27e-14	DOWN
RSC1A1	7.24349	7.92259	-0.679106	0.624552	1.19e-17	3.83e-16	DOWN
RSF1	9.24771	9.81578	-0.568067	0.67452	7.37e-17	1.94e-15	DOWN
RSPH1	6.12421	6.65656	-0.532351	0.691427	7.89e-05	0.000213547	DOWN
RSPRY1	8.16668	8.66108	-0.4944	0.709857	3.7e-10	2.41e-09	DOWN
RTN1	7.09657	7.80194	-0.705371	0.613285	2.27e-05	6.71e-05	DOWN
RUNDC1	9.52441	9.93992	-0.415512	0.749754	1.41e-10	9.94e-10	DOWN
RUNDC3B	4.28572	4.79041	-0.504694	0.70481	6.42e-07	2.48e-06	DOWN
RUNX1	11.5659	11.8969	-0.331023	0.794972	2.62e-07	1.07e-06	DOWN
RUNX1T1	3.85007	4.83546	-0.985395	0.505087	2.82e-12	2.75e-11	DOWN
RYBP	10.1823	10.5934	-0.411142	0.752028	1.33e-18	5.49e-17	DOWN
RYR2	3.33091	3.83294	-0.502035	0.70611	6.87e-05	0.000187712	DOWN
S1PR1	8.27333	8.73154	-0.458206	0.727891	4.47e-05	0.000126037	DOWN
S1PR3	9.28069	9.73907	-0.45838	0.727803	1.72e-06	6.15e-06	DOWN
SALL2	8.02507	8.68608	-0.661003	0.632439	8.88e-09	4.59e-08	DOWN
SAMD12	8.46722	9.06582	-0.598601	0.660394	2.22e-09	1.26e-08	DOWN
SAMD8	6.17976	6.80695	-0.627195	0.647434	5.6e-16	1.19e-14	DOWN
SAMHD1	9.27714	9.70887	-0.431733	0.741371	2.06e-05	6.14e-05	DOWN
SAP30L	9.60691	9.95761	-0.350703	0.784202	1.82e-13	2.23e-12	DOWN
SASH1	9.51752	10.0981	-0.580624	0.668675	5.2e-09	2.79e-08	DOWN
SAV1	9.39712	9.77165	-0.374531	0.771356	3.33e-10	2.19e-09	DOWN
SBF2	8.97533	9.57362	-0.59829	0.660536	3.2e-16	7.18e-15	DOWN
SBNO1	8.24568	9.12306	-0.877386	0.544353	2.65e-15	4.81e-14	DOWN
SCAMP1	10.0733	10.657	-0.583704	0.667249	2.47e-23	5.31e-21	DOWN
SCAPER	7.81019	8.13316	-0.322976	0.799419	2.01e-07	8.37e-07	DOWN
SCCPDH	10.4384	10.8858	-0.447445	0.73334	2.75e-05	8.03e-05	DOWN
SCG2	4.91466	5.4486	-0.533936	0.690668	9.86e-05	0.00026302	DOWN
SCGB1D2	6.13029	7.66671	-1.53642	0.344741	4.23e-05	0.000119682	DOWN
SCGB2A2	7.99043	9.9368	-1.94637	0.259468	4.63e-06	1.54e-05	DOWN
SCN2B	2.59504	3.56302	-0.967985	0.511219	5.25e-10	3.33e-09	DOWN
SCN3A	2.63016	3.32933	-0.699167	0.615928	3.45e-07	1.39e-06	DOWN
SCN3B	3.38639	4.04138	-0.654993	0.635078	1.54e-06	5.56e-06	DOWN
SCN4B	6.32017	7.08472	-0.76455	0.588637	8.86e-10	5.41e-09	DOWN
SCN7A	2.25308	3.93994	-1.68686	0.310601	2.57e-19	1.31e-17	DOWN
SCN8A	4.17432	4.74176	-0.567438	0.674814	4.17e-05	0.00011814	DOWN
SCNN1A	9.83174	10.779	-0.947295	0.518604	3.55e-08	1.67e-07	DOWN
SCRN3	8.0588	8.44532	-0.386513	0.764976	3.12e-15	5.55e-14	DOWN
SCUBE1	4.55404	5.27583	-0.721789	0.606345	4.68e-05	0.000131549	DOWN
SCUBE2	9.34677	11.1754	-1.82862	0.281533	4.8e-12	4.46e-11	DOWN
SCYL2	9.67511	10.1588	-0.483652	0.715165	9.75e-15	1.55e-13	DOWN
SDR16C5	5.72402	6.68361	-0.959587	0.514204	0.000187602	0.000475036	DOWN
SEC23A	9.75696	10.1654	-0.408449	0.753433	1.58e-09	9.22e-09	DOWN
SEC23IP	10.0107	10.4724	-0.461628	0.726166	1.45e-16	3.53e-15	DOWN
SEC24A	9.40361	9.87955	-0.475939	0.718998	9.16e-15	1.47e-13	DOWN
SEC24B	9.73426	10.1651	-0.430861	0.741819	6.82e-18	2.37e-16	DOWN
SEC24D	10.3981	10.9126	-0.514456	0.700057	2.83e-12	2.76e-11	DOWN
SEC62	11.4684	11.8656	-0.39717	0.759347	9.51e-19	4.07e-17	DOWN
SECISBP2L	9.6317	10.1071	-0.475408	0.719263	1.68e-11	1.4e-10	DOWN
SEL1L	11.194	11.7839	-0.589945	0.664368	3.75e-22	4.68e-20	DOWN
SEMA3C	10.412	11.2706	-0.85855	0.551506	3.05e-10	2.02e-09	DOWN
SEMA3D	5.02106	5.65581	-0.634743	0.644055	0.000138257	0.000359502	DOWN
SEMA3E	5.59931	6.73564	-1.13633	0.454914	6.81e-08	3.05e-07	DOWN
SEMA5A	8.3603	9.37242	-1.01212	0.495818	3.27e-18	1.23e-16	DOWN
SEMA6D	5.94932	6.80879	-0.859466	0.551157	1.37e-11	1.16e-10	DOWN
SENP7	8.18618	8.52386	-0.337681	0.791312	2.01e-06	7.1e-06	DOWN
SEPSECS	7.91386	8.28643	-0.372571	0.772405	4.63e-09	2.5e-08	DOWN
SERHL2	6.67652	7.2829	-0.606372	0.656846	3.09e-05	8.94e-05	DOWN
SERINC1	11.9127	12.4577	-0.544975	0.685403	6.82e-20	4.27e-18	DOWN
SERINC3	10.8557	11.2867	-0.430994	0.741751	2.55e-15	4.67e-14	DOWN
SERINC5	6.13837	7.22141	-1.08304	0.472033	1.1e-13	1.42e-12	DOWN
SERPINA11	4.54613	6.19553	-1.64939	0.318774	1.32e-08	6.64e-08	DOWN
SERPINA6	2.45944	3.87166	-1.41222	0.375733	8.87e-06	2.8e-05	DOWN
SESN3	6.02615	6.6814	-0.655252	0.634965	1.98e-05	5.92e-05	DOWN
SESTD1	10.1504	10.4769	-0.326509	0.797464	5.67e-06	1.85e-05	DOWN
SETBP1	7.98929	8.92184	-0.932554	0.52393	3.76e-16	8.35e-15	DOWN
SETD2	10.628	10.958	-0.330008	0.795532	1.63e-13	2.02e-12	DOWN
SETD7	10.5213	11.1862	-0.664925	0.630721	9.39e-21	7.48e-19	DOWN
SETX	10.5769	10.9928	-0.415927	0.749538	2.14e-16	5.02e-15	DOWN
SEZ6L	2.35502	3.20415	-0.849127	0.555121	7.19e-07	2.75e-06	DOWN
SFMBT2	5.88057	6.44624	-0.565662	0.675645	0.000136924	0.000356251	DOWN
SFRP2	12.2387	12.8532	-0.6145	0.653156	0.000119336	0.000313763	DOWN
SFRP4	9.61903	10.571	-0.952022	0.516907	1.04e-06	3.88e-06	DOWN
SGCB	9.34925	9.70245	-0.353202	0.782845	4.67e-07	1.84e-06	DOWN
SGCD	7.25274	8.20312	-0.95038	0.517496	4.4e-13	5.01e-12	DOWN
SGK3	9.27927	9.70254	-0.423265	0.745735	5.58e-05	0.000154575	DOWN
SGMS2	7.90475	8.33356	-0.428812	0.742873	2.4e-05	7.07e-05	DOWN
SGPP1	7.92309	8.29205	-0.36896	0.774341	0.000118407	0.000311463	DOWN
SH2B3	9.23532	9.56273	-0.327409	0.796967	2.15e-06	7.56e-06	DOWN
SH2D4A	7.77799	8.15216	-0.374169	0.771549	2.63e-05	7.7e-05	DOWN
SH3BGRL2	7.74516	8.31661	-0.571445	0.672942	1.9e-07	7.95e-07	DOWN
SH3BGRL	11.6438	12.3435	-0.699731	0.615687	3.68e-11	2.88e-10	DOWN
SH3BP4	10.8653	11.2855	-0.420125	0.74736	2.33e-09	1.32e-08	DOWN
SH3D19	9.54918	10.1283	-0.579162	0.669353	7.78e-17	2.04e-15	DOWN
SH3RF1	9.6193	10.0256	-0.406299	0.754557	7.04e-07	2.7e-06	DOWN
SHANK2	9.25813	9.6886	-0.430462	0.742024	6.88e-06	2.22e-05	DOWN
SHE	6.65176	7.19392	-0.542162	0.686741	1.33e-07	5.7e-07	DOWN
SHISA6	1.9424	2.47071	-0.528317	0.693363	2.25e-05	6.66e-05	DOWN
SHOC2	10.0327	10.5294	-0.496765	0.708694	2.5e-21	2.38e-19	DOWN
SHPRH	7.44452	8.2092	-0.764674	0.588586	1.34e-12	1.39e-11	DOWN
SHQ1	8.58013	8.9788	-0.398673	0.758556	8.95e-21	7.2e-19	DOWN
SHROOM3	10.9255	11.3454	-0.419977	0.747437	6.75e-09	3.56e-08	DOWN
SHROOM4	7.27161	7.90691	-0.635301	0.643806	1.96e-13	2.38e-12	DOWN
SIAE	9.01014	9.52054	-0.510403	0.702026	5.42e-11	4.11e-10	DOWN
SIAH2	10.5335	10.8744	-0.340866	0.789567	5.7e-05	0.00015762	DOWN
SIDT1	8.17979	9.06133	-0.881542	0.542787	3.43e-06	1.16e-05	DOWN
SIDT2	9.82122	10.1916	-0.370356	0.773591	4.02e-13	4.62e-12	DOWN
SIGLEC15	3.12499	3.65036	-0.525372	0.69478	0.000379588	0.000914486	DOWN
SIGLEC6	2.21891	2.75484	-0.535929	0.689714	0.000199103	0.00050209	DOWN
SIK2	8.74092	9.1387	-0.397773	0.759029	7.09e-10	4.4e-09	DOWN
SIK3	9.55505	9.90448	-0.349425	0.784897	1.13e-08	5.75e-08	DOWN
SIRT1	8.99731	9.4191	-0.421784	0.746501	2.33e-15	4.31e-14	DOWN
SKAP1	6.91576	7.54565	-0.629893	0.646225	2.1e-05	6.25e-05	DOWN
SKAP2	8.6158	9.04983	-0.434029	0.740192	2.79e-06	9.61e-06	DOWN
SKIL	8.93343	9.53562	-0.602193	0.658752	7.76e-11	5.71e-10	DOWN
SLC10A6	2.31874	2.84328	-0.524541	0.69518	7.4e-06	2.38e-05	DOWN
SLC10A7	7.21966	7.67969	-0.460024	0.726974	5.22e-17	1.44e-15	DOWN
SLC12A2	10.3227	11.0559	-0.733216	0.601561	8.3e-09	4.31e-08	DOWN
SLC12A6	8.31375	8.68047	-0.366726	0.775541	1.15e-08	5.84e-08	DOWN
SLC13A2	3.59893	4.41499	-0.816055	0.567993	0.000296124	0.00072601	DOWN
SLC14A2	1.46137	2.38062	-0.919253	0.528783	1.8e-11	1.49e-10	DOWN
SLC16A12	2.02982	2.79097	-0.761154	0.590024	2.3e-09	1.31e-08	DOWN
SLC16A4	6.72287	7.38157	-0.658701	0.633448	1.47e-08	7.34e-08	DOWN
SLC16A6	6.32309	7.52711	-1.20402	0.434064	3.12e-09	1.72e-08	DOWN
SLC16A7	3.47705	4.31506	-0.838011	0.559414	5.48e-11	4.15e-10	DOWN
SLC16A9	5.24776	5.78376	-0.536003	0.689679	1.23e-05	3.81e-05	DOWN
SLC18A2	2.30227	3.29073	-0.988455	0.504017	1.73e-11	1.44e-10	DOWN
SLC19A2	9.49808	10.0075	-0.509391	0.702519	1.11e-08	5.65e-08	DOWN
SLC1A1	7.3423	8.09536	-0.753059	0.593344	0.000407691	0.000976722	DOWN
SLC1A2	6.50538	7.4809	-0.975522	0.508556	3.7e-08	1.73e-07	DOWN
SLC1A4	10.5219	10.9041	-0.382236	0.767247	2.23e-05	6.61e-05	DOWN
SLC22A5	8.61872	9.04052	-0.421799	0.746493	4.75e-06	1.57e-05	DOWN
SLC24A1	8.0633	8.52683	-0.463534	0.725207	8.83e-13	9.52e-12	DOWN
SLC24A2	2.42709	3.5092	-1.08211	0.472339	3.82e-11	2.98e-10	DOWN
SLC25A21	2.84253	3.34808	-0.505556	0.704389	2.09e-05	6.22e-05	DOWN
SLC25A24	9.87497	10.4381	-0.563164	0.676816	1.13e-16	2.84e-15	DOWN
SLC25A30	8.10369	8.5082	-0.40451	0.755493	1.75e-09	1.01e-08	DOWN
SLC25A40	6.89177	7.43988	-0.54811	0.683915	3.42e-13	3.97e-12	DOWN
SLC25A46	8.5514	9.05952	-0.508121	0.703138	2.7e-20	1.94e-18	DOWN
SLC26A2	9.08813	9.50719	-0.419063	0.74791	4.39e-07	1.73e-06	DOWN
SLC26A4	3.33436	3.71781	-0.383446	0.766604	0.000237706	0.00059155	DOWN
SLC26A5	1.20014	1.62605	-0.425909	0.74437	0.000214208	0.000537503	DOWN
SLC29A3	8.49661	8.83464	-0.338022	0.791125	1.81e-07	7.58e-07	DOWN
SLC2A10	9.77017	10.3851	-0.614898	0.652976	8.66e-08	3.82e-07	DOWN
SLC2A13	6.85824	7.47134	-0.613097	0.653792	1.35e-11	1.15e-10	DOWN
SLC30A1	8.00751	8.5916	-0.584093	0.667068	3.47e-15	6.08e-14	DOWN
SLC30A4	5.42996	6.25303	-0.823066	0.56524	2.53e-14	3.72e-13	DOWN
SLC30A5	9.96373	10.3675	-0.403792	0.755869	1.73e-17	5.36e-16	DOWN
SLC30A6	7.96846	8.38181	-0.413352	0.750877	1.11e-10	7.95e-10	DOWN
SLC30A7	9.6241	9.96554	-0.341436	0.789255	8.94e-14	1.17e-12	DOWN
SLC30A8	3.30286	4.76402	-1.46116	0.3632	1.92e-06	6.8e-06	DOWN
SLC35A3	8.27735	9.00021	-0.722861	0.605895	2.01e-20	1.51e-18	DOWN
SLC35A5	8.78962	9.25019	-0.460574	0.726697	1.27e-24	4.55e-22	DOWN
SLC35D1	8.91575	9.35577	-0.440018	0.737125	2.76e-12	2.7e-11	DOWN
SLC35F1	2.86351	3.33341	-0.4699	0.722014	1.47e-06	5.33e-06	DOWN
SLC35F5	9.37439	9.81461	-0.44022	0.737022	1.75e-14	2.63e-13	DOWN
SLC38A11	1.48546	2.31853	-0.833066	0.561335	1.74e-13	2.14e-12	DOWN
SLC38A1	12.2301	12.6129	-0.382735	0.766982	1.52e-06	5.5e-06	DOWN
SLC38A4	2.89077	3.4465	-0.555724	0.680316	2.03e-05	6.06e-05	DOWN
SLC39A10	9.12203	9.65006	-0.528035	0.693499	8.64e-18	2.9e-16	DOWN
SLC39A14	9.9954	10.3322	-0.336753	0.791822	8.35e-07	3.16e-06	DOWN
SLC39A6	12.8562	13.805	-0.94887	0.518038	7.84e-10	4.83e-09	DOWN
SLC39A8	9.07205	9.4129	-0.340852	0.789575	0.000325722	0.000793826	DOWN
SLC39A9	10.9803	11.4706	-0.490358	0.711848	7.24e-19	3.21e-17	DOWN
SLC40A1	10.5802	11.9009	-1.32076	0.400325	1e-13	1.3e-12	DOWN
SLC41A2	7.31286	7.69531	-0.382454	0.767132	1.21e-05	3.75e-05	DOWN
SLC44A1	11.3354	11.7416	-0.406191	0.754613	1.45e-11	1.22e-10	DOWN
SLC44A4	8.51717	10.1754	-1.65824	0.316825	1.15e-09	6.86e-09	DOWN
SLC44A5	4.63797	5.637	-0.999028	0.500337	7.49e-06	2.4e-05	DOWN
SLC46A1	9.17508	9.62122	-0.446146	0.734001	2.6e-08	1.25e-07	DOWN
SLC46A3	8.2784	8.65592	-0.377519	0.76976	7.72e-06	2.47e-05	DOWN
SLC4A4	3.73042	4.49901	-0.768589	0.586991	2.6e-05	7.62e-05	DOWN
SLC4A7	9.3574	9.94028	-0.58288	0.66763	3.16e-09	1.75e-08	DOWN
SLC4A8	7.31442	8.31154	-0.997118	0.501	1.2e-09	7.14e-09	DOWN
SLC5A3	9.2338	9.57833	-0.344536	0.787561	1.57e-06	5.66e-06	DOWN
SLC5A4	1.2761	1.77245	-0.496351	0.708897	6.01e-09	3.19e-08	DOWN
SLC6A1	3.89475	4.50404	-0.60929	0.655519	2.71e-09	1.51e-08	DOWN
SLC7A2	9.01803	10.8232	-1.80521	0.28614	2.78e-12	2.71e-11	DOWN
SLC7A3	1.45755	2.11148	-0.65393	0.635547	1.02e-05	3.2e-05	DOWN
SLC7A8	10.3222	11.1075	-0.785324	0.580222	1.12e-08	5.7e-08	DOWN
SLC8A1	6.97042	7.49461	-0.524198	0.695346	3.67e-08	1.72e-07	DOWN
SLC8A3	1.65959	2.07821	-0.418617	0.748141	2.55e-05	7.49e-05	DOWN
SLC9A7	6.30274	6.83522	-0.53248	0.691365	7.35e-09	3.85e-08	DOWN
SLCO1C1	1.45314	1.86211	-0.408965	0.753164	2.67e-06	9.23e-06	DOWN
SLCO2A1	8.43215	8.87077	-0.438623	0.737838	3.09e-05	8.94e-05	DOWN
SLFN5	8.46272	8.97681	-0.514087	0.700236	1.37e-05	4.21e-05	DOWN
SLIT2	6.25385	7.38368	-1.12983	0.45697	2.76e-13	3.28e-12	DOWN
SLIT3	8.74694	9.22668	-0.47974	0.717107	0.000142697	0.000369985	DOWN
SLITRK4	4.57243	5.1732	-0.600766	0.659404	3.83e-06	1.29e-05	DOWN
SLITRK6	6.64851	8.06972	-1.42121	0.3734	1.01e-07	4.41e-07	DOWN
SLK	10.3488	10.7732	-0.424408	0.745144	1.95e-12	1.97e-11	DOWN
SLMAP	9.86753	10.2607	-0.393212	0.761432	4.29e-15	7.41e-14	DOWN
SMAD5	10.0471	10.5691	-0.521909	0.69645	1.96e-22	2.88e-20	DOWN
SMAD9	3.46532	4.04227	-0.576956	0.670377	2.71e-06	9.36e-06	DOWN
SMARCA2	11.194	11.5748	-0.380792	0.768016	4.05e-11	3.14e-10	DOWN
SMARCA5	10.9292	11.272	-0.342837	0.788489	2.14e-12	2.15e-11	DOWN
SMARCAD1	9.30404	9.73859	-0.434555	0.739922	8.9e-14	1.17e-12	DOWN
SMCR8	9.6197	10.0332	-0.413537	0.75078	5.71e-12	5.23e-11	DOWN
SMG1	11.2494	11.6471	-0.397711	0.759061	1.68e-12	1.71e-11	DOWN
SNAP23	10.1676	10.4939	-0.326325	0.797565	1.89e-11	1.55e-10	DOWN
SNCA	4.8775	5.23575	-0.358251	0.78011	0.000136131	0.000354509	DOWN
SNCAIP	5.21711	5.71854	-0.501434	0.706404	3.41e-05	9.78e-05	DOWN
SNED1	8.41338	8.95925	-0.545868	0.684979	2.09e-08	1.02e-07	DOWN
SNORD116-20	1.93238	2.50791	-0.575527	0.671041	5.98e-08	2.7e-07	DOWN
SNORD116-28	3.50078	4.22309	-0.722312	0.606125	4.92e-07	1.93e-06	DOWN
SNORD116-4	2.97061	3.853	-0.882386	0.542469	1.81e-06	6.45e-06	DOWN
SNRK	9.55457	9.91163	-0.357061	0.780753	2.58e-12	2.54e-11	DOWN
SNTB2	9.04878	9.46342	-0.41464	0.750207	9.21e-15	1.47e-13	DOWN
SNX13	9.45922	9.91443	-0.455209	0.729405	1.01e-16	2.56e-15	DOWN
SNX18	9.29894	9.63466	-0.33572	0.792388	8.68e-12	7.65e-11	DOWN
SNX19	10.4304	10.8296	-0.399178	0.75829	6.41e-17	1.72e-15	DOWN
SNX25	8.28673	8.62033	-0.333606	0.793551	2.3e-07	9.52e-07	DOWN
SNX27	10.1854	10.5608	-0.375367	0.770909	1.35e-13	1.7e-12	DOWN
SNX29	8.90538	9.36535	-0.45997	0.727001	1.56e-16	3.77e-15	DOWN
SNX30	8.99324	9.3795	-0.386257	0.765112	1.25e-11	1.08e-10	DOWN
SOCS4	8.8588	9.21511	-0.356311	0.781159	1.25e-15	2.48e-14	DOWN
SOCS5	9.16296	9.49371	-0.330745	0.795126	2.15e-10	1.46e-09	DOWN
SOCS6	9.52957	9.95885	-0.429275	0.742635	1.06e-12	1.13e-11	DOWN
SOCS7	5.50431	5.92221	-0.417901	0.748513	5.77e-06	1.88e-05	DOWN
SOHLH2	2.42083	2.88664	-0.46581	0.724065	0.00014784	0.000381996	DOWN
SON	12.1279	12.5773	-0.449389	0.732353	5.99e-20	3.8e-18	DOWN
SORBS1	9.08518	9.78111	-0.695938	0.617308	1.37e-10	9.69e-10	DOWN
SORCS1	3.5877	4.8504	-1.26271	0.416762	6.97e-07	2.67e-06	DOWN
SORD	9.54112	10.1368	-0.595703	0.661722	2.2e-10	1.49e-09	DOWN
SORL1	10.1538	10.9056	-0.751739	0.593887	6.25e-16	1.31e-14	DOWN
SOS2	9.64338	10.0537	-0.410325	0.752454	4.84e-14	6.71e-13	DOWN
SOX5	3.35556	4.11867	-0.763108	0.589226	3.33e-09	1.84e-08	DOWN
SOX7	6.48616	6.87683	-0.390671	0.762775	4.2e-05	0.00011895	DOWN
SP1	11.2324	11.6481	-0.415732	0.749639	3.52e-24	1.01e-21	DOWN
SP3	10.7646	11.1531	-0.388524	0.763911	3.3e-14	4.72e-13	DOWN
SP4	7.22925	7.68825	-0.458999	0.727491	1.25e-09	7.42e-09	DOWN
SPA17	6.70598	7.21278	-0.506794	0.703785	2.11e-08	1.03e-07	DOWN
SPAG1	7.92653	8.28794	-0.361411	0.778403	3.76e-06	1.27e-05	DOWN
SPARC	15.0627	15.4756	-0.412856	0.751135	3.44e-05	9.85e-05	DOWN
SPARCL1	11.5636	12.2152	-0.651618	0.636566	8.69e-10	5.31e-09	DOWN
SPATA13	7.77141	8.56084	-0.789427	0.578574	1.36e-07	5.82e-07	DOWN
SPATA17	5.48737	5.88899	-0.401618	0.757009	3.85e-05	0.000109561	DOWN
SPATA18	6.25789	7.45333	-1.19544	0.436653	5.46e-16	1.16e-14	DOWN
SPATA4	1.82323	2.30881	-0.48558	0.71421	0.000237557	0.000591264	DOWN
SPATA5	7.50861	7.88386	-0.375255	0.770969	1.06e-10	7.61e-10	DOWN
SPATA6	5.81428	6.65519	-0.840908	0.558292	1.99e-17	6.07e-16	DOWN
SPEF2	7.2305	7.79726	-0.566761	0.675131	9.18e-08	4.03e-07	DOWN
SPEN	10.6018	10.9602	-0.358405	0.780027	3.95e-11	3.07e-10	DOWN
SPG11	10.2932	10.8231	-0.529816	0.692643	6.98e-17	1.85e-15	DOWN
SPIN1	11.0545	11.4454	-0.390848	0.762681	4.32e-12	4.07e-11	DOWN
SPOCK1	8.7609	9.35306	-0.592162	0.663348	8.07e-06	2.57e-05	DOWN
SPOCK3	0.659673	1.28523	-0.625559	0.648169	1.47e-08	7.34e-08	DOWN
SPON1	8.98869	9.57442	-0.585736	0.666309	0.000123441	0.000323863	DOWN
SPOPL	9.82049	10.5447	-0.724164	0.605348	2.32e-21	2.23e-19	DOWN
SPRED1	9.33623	9.82447	-0.488233	0.712898	7.81e-11	5.74e-10	DOWN
SPRED2	9.79103	10.3149	-0.52382	0.695528	1.29e-07	5.54e-07	DOWN
SPRY1	8.69536	9.25983	-0.564469	0.676204	6.06e-08	2.73e-07	DOWN
SPTLC2	10.3994	11.065	-0.665697	0.630384	4.75e-19	2.26e-17	DOWN
SPTLC3	7.42334	7.77469	-0.351343	0.783854	5.06e-05	0.00014133	DOWN
SPTY2D1	9.72893	10.1485	-0.419532	0.747667	5.63e-17	1.53e-15	DOWN
SRBD1	8.50148	8.8244	-0.322928	0.799446	3.21e-13	3.76e-12	DOWN
SRFBP1	7.52618	8.00865	-0.482469	0.715752	3.84e-17	1.1e-15	DOWN
SRGAP1	8.48075	8.86456	-0.383804	0.766414	4.09e-06	1.37e-05	DOWN
SRGAP3	7.28845	7.63241	-0.343959	0.787876	1.54e-05	4.7e-05	DOWN
SRL	3.34685	3.78081	-0.433962	0.740226	7.4e-06	2.38e-05	DOWN
SSBP2	8.26388	8.76635	-0.502471	0.705897	1.4e-09	8.23e-09	DOWN
SSPN	8.73186	9.14151	-0.409645	0.752809	3.93e-07	1.57e-06	DOWN
SSTR1	2.23174	2.78063	-0.54889	0.683546	7.91e-06	2.52e-05	DOWN
SSTR2	5.77163	6.43108	-0.659444	0.633122	2.31e-05	6.82e-05	DOWN
ST6GAL2	6.72447	7.34768	-0.623212	0.649224	4.66e-06	1.55e-05	DOWN
ST6GALNAC3	4.77788	5.2489	-0.471016	0.721456	1.59e-08	7.9e-08	DOWN
ST8SIA6	4.09388	5.70491	-1.61103	0.327365	5.68e-15	9.49e-14	DOWN
STAG1	9.18545	9.73335	-0.547899	0.684015	4.33e-14	6.04e-13	DOWN
STAG2	10.9148	11.3503	-0.435512	0.739431	1.34e-16	3.3e-15	DOWN
STAM2	9.40583	9.89042	-0.48459	0.7147	4.47e-20	2.98e-18	DOWN
STARD13	8.50612	9.07617	-0.570054	0.673592	3.86e-12	3.67e-11	DOWN
STC1	8.76634	9.77898	-1.01264	0.495639	3.75e-13	4.34e-12	DOWN
STC2	11.1475	11.9246	-0.77713	0.583526	6.85e-05	0.000187225	DOWN
STEAP2	7.97074	8.98058	-1.00984	0.4966	4.82e-13	5.44e-12	DOWN
STEAP4	8.56487	9.25189	-0.687029	0.621132	0.000109628	0.000289743	DOWN
STK32B	5.99858	7.11826	-1.11968	0.460196	4.95e-09	2.66e-08	DOWN
STK39	9.18527	9.68	-0.494733	0.709693	4.41e-08	2.04e-07	DOWN
STMN2	3.94866	4.73746	-0.788796	0.578827	8.66e-08	3.82e-07	DOWN
STOM	11.9752	12.3341	-0.358849	0.779786	1.73e-06	6.18e-06	DOWN
STON1-GTF2A1L	0.585243	1.78142	-1.19618	0.436429	2.26e-15	4.19e-14	DOWN
STON2	7.00771	7.69104	-0.68333	0.622726	9.71e-08	4.25e-07	DOWN
STRN3	9.04566	9.5376	-0.491935	0.711071	4.76e-18	1.72e-16	DOWN
STRN	7.8073	8.52104	-0.713735	0.60974	1.1e-12	1.17e-11	DOWN
STS	8.43674	8.90575	-0.469012	0.722459	1.33e-10	9.43e-10	DOWN
STT3B	10.2449	10.8579	-0.613023	0.653825	2.87e-15	5.14e-14	DOWN
STXBP1	8.58684	8.95321	-0.36637	0.775732	8.53e-06	2.71e-05	DOWN
STXBP4	6.67328	7.35428	-0.681002	0.623732	1.9e-17	5.83e-16	DOWN
STXBP5	8.06923	8.61001	-0.540777	0.687401	1.47e-13	1.83e-12	DOWN
SUCNR1	2.52274	3.0476	-0.524858	0.695027	5.43e-05	0.000150759	DOWN
SULF1	11.4945	12.1244	-0.629829	0.646253	3.88e-06	1.3e-05	DOWN
SVEP1	7.51846	8.50836	-0.9899	0.503513	5.87e-11	4.42e-10	DOWN
SWAP70	10.3687	10.7142	-0.345531	0.787018	2.96e-10	1.96e-09	DOWN
SYDE2	6.75675	7.40399	-0.647237	0.638502	1.71e-09	9.93e-09	DOWN
SYNE1	9.09066	9.70399	-0.613327	0.653688	1.39e-10	9.82e-10	DOWN
SYNJ1	7.88101	8.35454	-0.473535	0.720198	3.34e-15	5.88e-14	DOWN
SYNJ2	9.0882	9.51728	-0.429087	0.742732	1.71e-06	6.12e-06	DOWN
[truncated: 15,215 more rows]

## Sheet: Table S2
Table S2
Modules of co-expressed genes identified with the Weighted Gene Co-expression Network Analysis (WGCNA)
MODULE: Module color code that correspond to the color code in Figure S1 STATUS: Indicates whether the majority of the module genes are up- or down-regulated in Black/African American breast cancer patients as compared to White patients MODULE_SIZE: The number of genes in the module GENES: The HGNC gene symbols of genes included in the module
MODULE	STATUS	MODULE_SIZE	GENES
CYAN	UP	846	A4GALT	AANAT	ABCA17P	ABCA7	ABCB6	ABCB9	ABCF1	ABHD11	ABHD8	ABT1	ACADS	ACADVL	ACAP3	ACBD6	ACSF3	ACYP1	ACYP2	ADAD2	ADAM11	ADAMTS13	ADAT2	ADCK5	AEN	AGAP4	AGAP6	AGER	AGRN	AIFM2	AMIGO3	AMT	AMY2B	ANAPC2	ANKRD13B	ANKRD16	ANKRD23	ANKRD9	ANKZF1	ANO9	ANP32C	APBA3	APBB3	APEX2	AQP8	ARHGAP33	ARHGAP39	ARHGAP8	ARHGEF19
GREEN	UP	431	ABCB8	ACOT8	ADAT3	AGTRAP	AIP	AK1	AKT1S1	ALDH16A1	ALKBH4	ALKBH6	ALKBH7	AMDHD2	ANKS3	AP2S1	APRT	ARF5	ARFGAP1	ARFRP1	ARL2	ARL6IP4	ARMC5	ATG4B	ATG4D	ATP6V1F	AURKAIP1	B3GAT3	B4GALT7	BAD	BANF1	BAX	BBC3	BCAP31	BCL7C	BLOC1S1	BOLA2	BRF1	BRMS1	BSG	BTBD2	BUD31	CCDC12	CCDC124	CCDC22	CCDC61	CCDC85B	CCDC9	CCM2
RED	UP	368	A2ML1	ABTB2	ACOT9	ACTL8	ADAM15	ADAMTSL4	AHSA1	AIF1L	AK2	AKR1E2	ALG3	AMY1A	ANKRD45	ANKS6	APBA2	ARHGAP22	ARHGEF4	ARL9	ART3	ASNS	ASS1	ATP6V1C2	AVEN	B3GNT4	B3GNT7	B4GALT2	BAIAP2L2	BARX1	BCL11A	BCL2L12	BID	BTG3	BYSL	C1QL2	C1QL4	C2CD4D	CAGE1	CALCB	CALML5	CAMKV	CBR1	CCDC86	CCL20	CCT3	CD164L2	CDC42EP1	CDH3
BLACK	UP	355	AAMP	AARSD1	ABTB1	ACD	ADRM1	AGAP3	AGPAT2	AIMP2	AKAP8L	ALKBH2	ANAPC11	ANKRD13D	ANKRD39	ANKRD54	AP1S1	ARHGDIA	ARL16	ARMC6	ASL	ASPSCR1	ATAD3A	ATAD3B	ATP6V0B	AUP1	B3GALT6	B3GNTL1	BCS1L	BGLAP	BOLA1	BOLA3	CC2D1A	CCDC107	CCDC130	CCDC137	CCDC28B	CD320	CDK10	CDK11B	CENPT	CFDP1	CFL1	CHCHD10	CHMP1A	CLN6	CLTA	CNFN	CNPY3
PINK	UP	332	AADAT	ABCC10	ABCD1	ACOT7	ACRV1	ACTR3B	ADM2	ALS2CL	AMD1	AMN	ANKLE1	ANP32B	APOBEC3B	ARID3C	ASF1B	ATOH7	AURKA	AURKB	B4GALNT1	BAK1	BIRC5	BSND	BUB1	CBS	CBX2	CC2D1B	CCDC150	CCDC18	CCK	CCL7	CCNA2	CCNB1	CCNB2	CCNE1	CCNF	CDC123	CDC20	CDC25A	CDC25B	CDC25C	CDC45	CDC6	CDC7	CDCA3	CDCA4	CDCA5	CDCA7
MAGENTA	UP	292	ACAP1	ACOXL	ADA	ADAMDEC1	AGAP2	AMPD2	ANGPTL6	APOBEC3A	APOBEC3F	APOC1	APOE	ARHGAP27	ARHGAP4	ARHGEF1	ARPC1B	ARRDC2	ARRDC5	B3GAT1	BATF3	BIN1	BTN1A1	BTNL8	C1QA	CAPN3	CARD9	CARNS1	CCDC88B	CCL17	CCL18	CCL25	CCL4L2	CD14	CD19	CD300C	CD38	CD6	CD72	CD7	CD79A	CD79B	CEACAM3	CEBPE	CEND1	CFP	CHFR	COL4A3	COL6A4P2
BLUE	DOWN	798	AAK1	AASDHPPT	ABCA1	ABCA11P	ABCD3	ABHD13	ABHD2	ABLIM1	ACER2	ACER3	ACO1	ADAM22	ADCYAP1R1	AFF1	AFTPH	AGGF1	AGL	AGPS	AHCYL1	AHNAK	AHR	AKAP5	AKAP6	ALDH6A1	ALG10	ALG10B	ALKBH8	AMIGO2	ANKHD1	ANKHD1-EIF4EBP3	ANKRD31	ANKRD44	ANKRD50	ANKS1B	ANO5	AP1AR	AP3B1	APPBP2	ARCN1	ARFGEF1	ARFIP1	ARHGAP18	ARHGAP29	ARHGAP32	ARHGAP42	ARHGEF6	ARID2
BROWN	DOWN	648	ACAP2	ADAM10	ADAT1	ADNP	AFF4	AHCYL2	AKAP10	AKAP11	AKAP2	AKAP9	ALMS1	ANKIB1	ANKRD12	ANKRD17	ANKRD26	ANKRD36BP1	ANO6	APAF1	APC	APOOL	APPL1	AQR	ARFGEF2	ARHGAP12	ARHGAP5	ARHGEF12	ARID4A	ARID4B	ARL13B	ARL5B	ASCC3	ASH1L	ASXL2	ATE1	ATF2	ATF6	ATF7	ATF7IP	ATM	ATP13A3	ATP2A2	ATP7A	ATRN	ATRX	ATXN1L	ATXN7	AVL9
YELLOW	DOWN	521	ABAT	ABCA12	ABCC8	ABCG1	ABHD12B	ABLIM3	ACACB	ACADSB	ACMSD	ACOT4	ACOX2	ACSM1	ADAL	ADAMTS15	ADCY1	ADCY9	AFF3	AGR2	AGR3	AGTR1	AK7	AKR7A3	ALCAM	AMACR	ANKRA2	ANKRD29	ANKRD30A	ANKRD30B	ANKRD42	ANO3	AP2B1	APBB2	APH1B	APOF	APPL2	AR	ARHGEF38	ARL1	ARSD	ARSG	ASPH	ASTN2	ATP6V1G2	ATP7B	ATP8B1	ATRNL1	BBS1
PURPLE	DOWN	174	AASS	ABCB5	ACSM5	ADAMTS18	ADAMTS5	ADCY5	AK5	ALDH1A1	AMPH	ANGPT2	ANGPT4	AOX1	APOL4	ARHGAP26	ARHGAP31	ARRDC4	ASXL3	ATP1A2	C1QTNF3	CALCR	CASQ2	CBLN1	CBLN4	CCBE1	CCKAR	CES1	CLDN19	CLIC5	CNTN3	COL13A1	COLEC12	CPA3	CPE	CST2	CX3CR1	CXCR2	CYSLTR1	CYSLTR2	DGKI	DLG2	DOCK10	DOCK11	DPYD	DSEL	DUSP6	EGR3	ENC1
GREENYELLOW	DOWN	164	ABCA6	ABCA8	ABCA9	ABCB1	ABCC9	ABCG2	ABI3BP	ADH1A	ADH1B	ADIPOQ	AMOTL1	ANGPTL1	ANK2	AOC3	AQP1	ARHGAP20	ARHGAP24	ARHGAP28	ARHGAP6	ARL15	ASPA	ATP8B2	BACE1	BMX	C1QTNF7	C6	C7	CACNA1C	CALCRL	CAV1	CCL14	CD36	CD93	CDH13	CDH5	CDH6	CDK15	CDO1	CFI	CHL1	CLDN11	COL14A1	CORO2B	CYP2U1	CYTL1	DBX2	DKK2
TAN	DOWN	143	ADAM12	ADAM23	ADAMTS12	ADAMTS2	ADAMTSL1	AKAP12	ANGPTL2	ANTXR1	ANTXR2	ASPN	BHMT2	BNC2	CCDC36	CCDC80	CDH11	CFH	CHSY3	CNIH3	CNRIP1	CNTN1	COL12A1	COL15A1	COL3A1	COL5A2	COL6A3	COL8A1	CORIN	CRISPLD2	CXCL12	DAB2	DACT1	DCN	DIO2	DPP4	ECM2	EDNRA	EMILIN1	ETV1	EVC	F13A1	FAP	FAT3	FAT4	FBN1	FGF14	FILIP1L	FKBP14
[truncated: 799 more columns]

## Sheet: Table S3
Table S3
Gene module pathway overrepresentation analysis
KEGG_PATHWAY: Name of the KEGG pathway MODULE: Module color code that correspond to the color code in Figure S1 OVF: Overrepresentation fold QVALUE: False discovery rate adjusted p-value PVALUE: Fisher excat test p-value MODULE_SIZE: The number of genes in the module MODULE_GENES_IN_PATHWAY: The number of genes that are involved in the corresponding KEGG pathway TOTAL_GENES_IN_PATHWAY: The total …
KEGG PATHWAY	MODULE	OVR_FOLD	QVALUE	PVALUE	MODULE_SIZE	MODULE_GENES_IN_PATHWAY	TOTAL_GENES_IN_PATHWAY	GENES_INVOLVED_IN_PATHWAY
KEGG_CELL_CYCLE	pink	21.08	8.7803e-26	1.35081e-27	332	30	124	GTF2A1; GTF2H3; TAF1; GTF2I; TAF1L; TAF13
KEGG_PRIMARY_IMMUNODEFICIENCY	magenta	20.83	2.37715e-06	2.58385e-08	292	8	35	VWF; IGF1; THBS4; PDGFD; HGF; CAV1; THBS1; PARVA; FLT1; KDR
KEGG_ABC_TRANSPORTERS	greenyellow	19.77	4.85478e-05	1.3121e-06	164	6	44	BUB1; PLK1; CCNB1; CDK1; CDC25B; MAD2L1; PKMYT1; CDC25A; CDC25C; CCNA2; CCNB2
KEGG_DNA_REPLICATION	pink	17.67	1.91934e-06	8.85848e-08	332	8	36	GALC; ACER2; ASAH2; SPTLC2; ACER3; ASAH1; SGMS2
KEGG_ECM_RECEPTOR_INTERACTION	tan	15.31	2.38651e-06	1.16752e-07	143	8	84	HTR2A; SLC8A1; CYSLTR1; CYSLTR2; PRKACB; SLC8A3; CCKAR; PTAFR
KEGG_COMPLEMENT_AND_COAGULATION_CASCADES	greenyellow	14.37	4.85478e-05	1.18612e-06	164	7	69	CCNE1; CCNB1; CDK1; CHEK1; RRM2; CHEK2; GTSE1; CCNB2
KEGG_OXIDATIVE_PHOSPHORYLATION	green	12.5	8.49874e-14	2.02351e-15	431	21	131	AOC3; ADH1A; ADH1B
KEGG_RIBOSOME	green	12.43	4.82527e-12	2.29775e-13	431	18	88	CD79A; TAP1; TNFRSF13C; ZAP70; IGLL1; TAP2; CD19; ADA
KEGG_PARKINSONS_DISEASE	green	11.31	4.82527e-12	2.08619e-13	431	19	128	CCNE1; BUB1; PCNA; PLK1; CDC20; CCNB1; MCM2; CDK1; CDC7; CDC25B; CDKN2C; MAD2L1; MCM3; TTK; CHEK1; MCM7; PKMYT1; CDC25A; E2F1; CDC45; CDC25C; CHEK2; E2F2; CCNA2; CCNB2; PTTG1; MCM5; ESPL1; CDKN2D; CDC6
KEGG_TYROSINE_METABOLISM	greenyellow	10.15	0.0298153	0.00399637	164	3	42	FGF14; PDGFRB; PDGFRA; PDGFC
KEGG_HUNTINGTONS_DISEASE	green	9.67	4.31895e-15	5.1416e-17	431	27	180	C7; VWF; C6; PROS1; F2R; CFI; THBD
KEGG_RNA_POLYMERASE	black	9.25	0.020952	0.00149077	355	4	29	RPL36; RPS9; RPLP1; UBA52; RPS8; RPL37; RPL18; RPL28; FAU; RPL35; RPL13; RPL18A; RPL13A; RPS19; RPL37A; RPLP2; RPS5; RPS15
KEGG_PROGESTERONE_MEDIATED_OOCYTE_MATURATION	pink	9.19	2.02847e-06	1.24829e-07	332	11	85	PTPN6; CD79A; CD72; NFKBIE; CD79B; CD19
KEGG_P53_SIGNALING_PATHWAY	pink	8.68	0.000127745	9.82657e-06	332	8	68	GUCY1A2; PDGFD; LPAR1; HTR2B
KEGG_ALZHEIMERS_DISEASE	green	8.59	5.87056e-12	3.49438e-13	431	22	165	PCNA; MCM2; FEN1; RNASEH2A; MCM3; MCM7; RFC4; MCM5
KEGG_MELANOMA	tan	8.57	0.0178198	0.00153514	143	4	71	EDNRB; WNT9B; MITF; FZD4
KEGG_FOCAL_ADHESION	tan	8.54	2.38651e-06	1.32584e-07	143	11	199	CD38; CD7; FLT3LG; CD14; IL3RA; CD19
KEGG_OOCYTE_MEIOSIS	pink	8.29	8.75862e-07	2.69496e-08	332	13	112	VWF; THBS4; THBS1; CD36
KEGG_CYSTEINE_AND_METHIONINE_METABOLISM	pink	8.25	0.0231204	0.00213419	332	4	34	SEMA5A; UNC5B; SEMA3D; CXCL12; SLIT3
KEGG_PPAR_SIGNALING_PATHWAY	greenyellow	7.7	0.0298153	0.00227801	164	4	69	COL5A2; LAMA4; COL3A1; COL6A3; LAMA2; PDGFRB; PDGFRA; THBS2; TNN; PDGFC; ITGA1
KEGG_MELANOMA	greenyellow	7.47	0.0298153	0.00252892	164	4	71	CCNE1; AURKA; BUB1; PLK1; CDC20; CCNB1; CDK1; MAD2L1; PKMYT1; CDC25C; CCNB2; PTTG1; ESPL1
KEGG_DILATED_CARDIOMYOPATHY	purple	6.94	0.0247184	0.00102095	174	5	90	TAP1; LTA; IFI30; LGMN; TAP2; KIR3DL2
KEGG_PYRIMIDINE_METABOLISM	green	6.81	1.13527e-05	8.10908e-07	431	12	98	COL5A2; LAMA4; COL3A1; COL6A3; LAMA2; THBS2; TNN; ITGA1
KEGG_FOCAL_ADHESION	greenyellow	6.73	0.000102456	4.15362e-06	164	10	199	NDUFA8; NDUFB8; CDK5; NDUFS8; BAD; NDUFB10; NDUFA1; UQCR11; NDUFA7; NDUFB2; NDUFS7; UQCRC1; COX8A; COX5B; UQCR10; NDUFB7; COX4I1; HSD17B10; NDUFS3; NDUFS6; COX6A1; NDUFV1
KEGG_DILATED_CARDIOMYOPATHY	tan	6.68	0.0262539	0.00364637	143	4	90	UQCR11; UQCRC1; COX8A; COX5B; UQCR10; COX4I1; COX6A1
KEGG_RIBOSOME	black	6.67	0.00148294	1.97725e-05	355	9	88	NDUFA8; NDUFB8; NDUFS8; NDUFB10; NDUFA1; UQCR11; NDUFA11; NDUFA7; NDUFB2; NDUFS7; UQCRC1; COX8A; ATP6V1F; COX5B; UQCR10; NDUFB7; COX4I1; NDUFS3; NDUFS6; COX6A1; NDUFV1
KEGG_BASE_EXCISION_REPAIR	green	6.57	0.0408634	0.00486469	431	4	35	POLR2F; POLR2H; ZNRD1; POLR2I
KEGG_BASAL_TRANSCRIPTION_FACTORS	brown	6.56	0.0220528	0.00072297	648	6	35	ABCA9; ABCC9; ABCG2; ABCB1; ABCA6; ABCA8
KEGG_ECM_RECEPTOR_INTERACTION	greenyellow	6.34	0.0298153	0.00444225	164	4	84	CBS; AMD1; DNMT3A; DNMT3B
KEGG_SPHINGOLIPID_METABOLISM	blue	6.21	0.0360079	0.00040918	798	7	39	NDUFA8; NDUFB8; NDUFS8; NDUFB10; NDUFA1; UQCR11; NDUFA7; NDUFB2; NDUFS7; UQCRC1; COX8A; COX5B; UQCR10; NDUFB7; COX4I1; NDUFS3; NDUFS6; COX6A1; NDUFV1
KEGG_B_CELL_RECEPTOR_SIGNALING_PATHWAY	magenta	6.2	0.014966	0.000650697	292	6	75	SGCD; LAMA2; PLN; ITGA1
KEGG_GAP_JUNCTION	greenyellow	6.18	0.0298153	0.00483491	164	4	90	ADIPOQ; PLIN1; CD36; PCK1
KEGG_AXON_GUIDANCE	tan	5.88	0.0178198	0.00197997	143	5	129	JAM2; MYH11; CLDN11; PRKCH; AMOTL1
KEGG_VASCULAR_SMOOTH_MUSCLE_CONTRACTION	greenyellow	5.85	0.0298153	0.00207695	164	5	115	IGF1; PDGFD; HGF; MITF
KEGG_ANTIGEN_PROCESSING_AND_PRESENTATION	magenta	5.7	0.0180908	0.000983197	292	6	88	RPS21; RPL19; RPL27; RPS16; RPSA; RPS17; RPS3; RPL38; RPS10
KEGG_CALCIUM_SIGNALING_PATHWAY	purple	5.62	0.0126206	0.000132849	174	8	177	CACNA1C; GUCY1A2; MYH11; PRKCH; CALCRL
KEGG_HEMATOPOIETIC_CELL_LINEAGE	magenta	5.41	0.0194514	0.00126857	292	6	87	POLE4; MPG; POLD2; NTHL1
KEGG_MELANOGENESIS	greenyellow	5.16	0.0436032	0.00883849	164	4	101	POLR2E; UCK1; TXNRD2; POLE4; NT5C; DTYMK; ITPA; POLD2; UCKL1; NME3; POLR2L; POLR2J
KEGG_TIGHT_JUNCTION	greenyellow	5.09	0.0298153	0.00369935	164	5	132	SLC8A1; PRKACB; TGFB3; ADCY5; ITGA4
KEGG_CARDIAC_MUSCLE_CONTRACTION	green	5.05	0.00796009	0.000852867	431	7	78	NDUFA8; POLR2E; NDUFB8; NDUFS8; GPX1; NDUFB10; NDUFA1; UQCR11; AP2S1; NDUFA7; NDUFB2; NDUFS7; UQCRC1; CLTB; COX8A; BAX; BBC3; COX5B; UQCR10; POLR2L; NDUFB7; COX4I1; NDUFS3; NDUFS6; POLR2J; COX6A1; NDUFV1

## Sheet: Table S4
Table S4
Breast cancer patient survival analysis for genes upregulated in African American patients as compared to White patients
BAA_PERCENT_OVR: Frequency of gene overexpression in Black/African American patients, % BAA_PVALUE: log-rank p-value calculated for survival rates of Black/African American patients with and without gene overexpression BAA_MST_NORM: mean survival time of Black/African American patients without gene overexpression BAA_MST_OVR: mean survival time of Black/African American patients with gene overexp…
GENE	BAA_PERCENT_OVR	BAA_PVALUE	BAA_MST_NORM	BAA_MST_OVR	WT_PERCENT_OVR	WT_PVALUE	WT_MST_NORM	WT_MST_OVR	PVAL_WT_AA	FC_WT_AA	GROUP
RCOR2	8.42697	8.60424e-05	156.753	55.77	4.52675	0.145284	162.621	139.094	0.000266695	2.49407	4
UQCRB	34.2697	9.2956e-05	189.599	84.1498	20.5761	0.351394	151.366	173.612	0.000746738	2.06313	4
PHKG1	8.42697	0.000169574	152.685	52.8868	5.21262	0.273694	157.392	226.771	0.00161538	4.28785	4
POMC	8.98876	1.16782e-05	153.185	43.2592	2.46914	0.165742	158.626	253.025	0.00257581	5.84905	4
TMPRSS13	6.17978	3.21647e-05	148.814	34.8919	3.29218	0.438764	162.347	109.027	0.00265769	3.12471	4
LINGO3	8.98876	0.00058662	149.419	43.1705	2.46914	0.306725	161.775	129.739	0.00416025	3.00526	4
ITPA	19.6629	1.12346e-06	159.675	57.5789	5.62414	0.439698	159.781	224.617	0.0046129	3.90103	4
ZNRD1	24.1573	0.000729979	161.739	67.2034	6.17284	0.134164	158.063	240.309	0.00530036	3.57585	4
PCSK1N	16.8539	0.000125836	151.783	45.9409	3.97805	0.146364	157.853	231.83	0.00568447	5.04626	4
MDFI	25.2809	1.20875e-05	159.047	53.7742	8.09328	0.253806	157.086	211.857	0.00585193	3.93975	4
MRPL18	12.9213	0.000228438	151.299	55.2045	5.48697	0.379933	163.222	194.706	0.00606624	3.527	4
CUZD1	10.6742	0.000561702	151.81	54.1404	5.48697	0.818638	166.022	127.288	0.00633791	2.35108	4
PNLDC1	5.61798	0.00532968	147.098	35.3296	3.56653	0.105511	159.323	261.064	0.00636574	7.38939	4
ATP6V1C2	11.236	0.00980205	150.647	59.7439	5.21262	0.138559	159.778	125.76	0.00819445	2.10499	4
RIN3	7.30337	0.00138299	147.622	32.0811	4.38957	0.213596	160.181	125.773	0.00826414	3.92046	4
GPT2	8.98876	0.000213422	151.834	50.7799	5.48697	0.277634	155.876	222.9	0.0084613	4.38953	4
ATG9B	6.74157	0.00505469	148.901	54.891	2.88066	0.450672	162.581	155.648	0.0111179	2.83558	4
ADAM11	6.74157	0.00314359	148.442	53.1233	1.37174	0.142695	161.283	160.899	0.0123504	3.02878	4
COQ9	5.05618	3.51855e-05	148.998	38.6545	2.60631	0.773143	165.961	94.2461	0.0132162	2.43817	4
CHCHD1	16.8539	0.0045238	153.694	66.6373	6.31001	0.152604	156.377	238.112	0.0135549	3.57325	4
ACYP2	11.7978	0.00355116	149.383	55.7048	6.99588	0.603413	159.686	184.704	0.0142983	3.31576	4
RPP21	26.9663	0.00388979	158.629	72.2055	6.17284	0.144888	157.966	248.303	0.0164946	3.43884	4
MAP2K3	9.55056	0.00168864	150.177	62.2375	5.21262	0.355032	162.262	182.514	0.0176498	2.93254	4
TMEM147	24.1573	0.00842358	156.017	69.6664	8.5048	0.269947	157.941	189.295	0.0181447	2.71716	4
ARID3C	5.61798	0.000562703	149.245	37.3527	2.60631	0.211996	157.842	230.103	0.0191203	6.16027	4
CPNE2	8.42697	0.00206801	150.37	58.897	1.64609	0.13148	161.463	133.216	0.0213867	2.26185	4
UROC1	7.30337	0.00305707	149.092	53.6692	3.42936	0.430669	160.893	112.657	0.0237371	2.0991	4
OBSL1	10.1124	1.72681e-05	154.026	52.3654	3.15501	0.378545	161.499	124.668	0.0264512	2.38074	4
AGAP4	5.61798	0.00405205	148.22	50.3172	3.84088	0.932459	166.107	125.108	0.0280333	2.48639	4
ADAT2	13.4831	0.00431401	151.614	61.5115	6.17284	0.440036	163.062	147.85	0.0282394	2.40362	4
SMOX	10.1124	0.00721346	148.107	59.1586	4.93827	0.160523	156.918	251.912	0.0306904	4.25825	4
BCL2L12	24.7191	0.000421668	155.075	54.9269	5.48697	0.999968	162.447	112.551	0.0433329	2.04911	4
KIF1C	5.05618	1.67963e-05	149.685	35.3759	2.74348	0.298884	163.813	73.5053	0.106144	2.07783	3
CTNNBIP1	7.30337	0.000828853	147.506	38.3197	3.56653	0.316959	162.794	83.5227	0.520066	2.17963	3
CLIC3	10.6742	0.000914358	148.559	41.6219	3.7037	0.593607	162.812	91.2537	0.175547	2.19244	3
FBXO46	11.7978	0.00107543	155.027	52.6933	5.76132	0.703864	162.557	107.512	0.0832015	2.04034	3
CUTA	17.4157	0.00233645	149.799	47.7186	4.93827	0.544014	160.385	212.509	0.0522353	4.45339	3
PHLDA3	13.4831	0.003032	147.611	73.5664	12.7572	0.847844	157.439	181.591	0.133266	2.46839	3
TNIP2	12.9213	0.00312297	148.406	48.9275	3.42936	0.417093	162.373	103.793	0.0684292	2.12137	3
PRDX4	11.236	0.00388187	149.758	55.878	4.93827	0.914318	159.434	198.267	0.0955453	3.54822	3
TAX1BP3	10.1124	0.0038964	148.945	51.0112	3.56653	0.680629	160.469	209.669	0.0868313	4.11026	3
RUVBL2	16.8539	0.0042434	153.425	60.6494	5.21262	0.817309	161.502	141.944	0.0584133	2.34041	3
PPP1R14B	12.9213	0.00450453	148.972	56.1555	4.52675	0.466425	161.287	187.737	0.161618	3.34316	3
TIMM8B	7.86517	0.00511499	148.037	47.4244	3.42936	0.258162	156.793	241.477	0.106859	5.09184	3
GATA6	10.1124	0.00649778	147.951	68.7546	2.74348	0.2947	158.95	247.556	0.093262	3.60058	3
DDN	7.30337	0.0073924	156.572	65.6722	1.23457	0.209549	161.772	140.877	0.0561837	2.14515	3
DGUOK	16.2921	0.00867235	148.903	51.6748	6.03567	0.247448	159.538	127.559	0.0944548	2.46849	3
FBXW10	11.7978	0.00938557	156.881	71.2586	4.66392	0.909177	163.382	143.617	0.0786159	2.01543	3
CTBP1	10.1124	1.95141e-06	150.52	41.2147	2.60631	0.656451	163.851	79.2529	0.00643553	1.92293	3
TULP1	15.7303	0.000142451	152.656	62.4955	4.38957	0.117452	161.477	108.832	0.000639188	1.74143	3
CLDN7	8.42697	0.000172848	152.055	50.5954	1.37174	0.308222	163.408	38.1699	0.800548	0.754413	3
TMEM61	8.98876	0.000335475	153.827	63.0166	4.66392	0.303568	160.477	114.848	0.00285114	1.8225	3
ARL9	11.236	0.000662933	156.585	63.6383	4.8011	0.616568	160.797	117.531	0.0297116	1.84685	3
HPDL	11.236	0.00101038	158.472	63.1475	2.88066	0.592876	163.442	107.957	0.0142501	1.70961	3
PRMT1	20.7865	0.00123553	155.341	64.2546	6.58436	0.680744	164.182	104.564	0.0487587	1.62734	3
MTHFSD	14.6067	0.00135581	151.578	59.8282	1.50892	0.667501	163.459	78.8868	0.211308	1.31855	3
FHL3	16.2921	0.00154023	150.398	68.9312	5.21262	0.355771	160.311	122.421	0.0193121	1.77599	3
GBGT1	8.42697	0.00164021	150.187	52.2752	3.7037	0.370158	163.593	92.5636	0.140261	1.7707	3
MOG	13.4831	0.00279395	156.424	64.715	3.42936	0.432955	161.758	118.441	0.0194019	1.8302	3
CRLF1	10.6742	0.00332977	150.385	49.4918	2.19479	0.599873	162.009	98.1803	0.113168	1.98377	3
KRT83	10.1124	0.00334143	150.047	54.5776	1.78326	0.835889	162.702	91.9315	0.115351	1.68442	3
KRT81	15.1685	0.00367713	150.072	53.0122	3.29218	0.952749	163.249	83.4634	0.107635	1.57442	3
PITPNM3	10.6742	0.00378095	150.195	48.2912	3.42936	0.460153	164.417	80.2044	0.0332491	1.66085	3
PRDM12	11.236	0.00384482	153.607	61.5348	2.74348	0.852707	161.749	117.06	0.106541	1.90234	3
PDE9A	10.6742	0.00417736	154.825	58.8853	4.8011	0.541804	162.695	104.76	0.11924	1.77905	3
GALNS	6.74157	0.00419326	149.662	53.8101	2.33196	0.719662	162.778	80.5593	0.124787	1.4971	3
NDUFS6	23.0337	0.00453093	151.083	59.27	5.76132	0.647087	162.169	106.823	0.315734	1.80232	3
BAX	22.4719	0.00489862	153.201	63.1519	3.15501	0.717088	163.845	79.8937	0.148228	1.2651	3
LZTS2	11.236	0.00490782	148.792	48.9587	3.42936	0.297653	163.61	69.8301	0.304623	1.42631	3
PPIH	19.1011	0.00508408	151.173	59.3915	7.27023	0.125806	164.197	97.703	0.275923	1.64507	3
CCDC102A	11.236	0.00534488	148.072	62.3776	1.37174	0.922157	163.013	56.0942	0.187501	0.899268	3
DLL3	14.6067	0.00567186	156.815	64.6461	5.07545	0.415167	164.58	99.7674	0.13863	1.54329	3
RENBP	12.9213	0.00697307	150.635	60.6145	3.97805	0.688089	163.23	118.743	0.0440051	1.959	3
BARX1	5.05618	0.00722803	153.062	57.7352	1.23457	0.984916	163.097	84.6411	0.3673	1.46602	3
TFAP4	20.2247	0.00846794	164.215	71.8265	9.87654	0.986815	167.844	127.663	0.014045	1.77738	3
RNPS1	28.6517	0.00857257	164.313	73.5518	14.5405	0.51877	167.858	146.122	0.00375571	1.98666	3
DAZAP1	20.7865	0.00884167	150.097	57.4554	3.97805	0.231564	163.614	85.1307	0.47359	1.48168	3
EHMT2	25.2809	0.0105896	155.092	71.1366	6.99588	0.158694	157.575	126.563	0.0613587	1.77915	3
PEX6	18.5393	0.0113188	157.196	62.812	5.48697	0.898928	163.295	118.101	0.151851	1.88024	3
SMAGP	11.7978	0.0114409	155.025	66.0883	3.56653	0.445524	161.247	123.029	0.072084	1.86159	3
FAM53A	11.236	0.0121668	149.555	62.0918	3.15501	0.177197	164.488	69.1994	0.51387	1.11447	3
CAMKV	5.05618	0.0125089	148.155	51.9747	1.37174	0.409852	162.303	123.934	0.0149484	2.38451	3
COX7B	13.4831	0.0126406	151.906	74.4431	5.21262	0.470525	161.518	165.117	0.167626	2.21802	3
KIFC3	11.236	0.0128344	148.474	47.089	1.78326	0.102132	163.385	69.1696	0.83958	1.46891	3
MYBPH	6.17978	0.0134406	153.959	62.1357	8.77915	0.495952	162.652	118.203	0.099633	1.90234	3
TCF25	8.42697	0.0136065	146.926	41.4676	0.960219	0.180186	163.236	28.4811	0.873299	0.686828	3
BCAP31	14.6067	0.0136187	150.774	62.8069	4.93827	0.884132	160.965	126.523	0.268225	2.01447	3
BCS1L	12.9213	0.0141571	147.818	71.2786	4.2524	0.407034	158.986	243.37	0.0678061	3.41435	3
GLIPR2	14.6067	0.0143767	150.349	61.6163	6.03567	0.261836	159.838	136.605	0.0109523	2.21703	3
MRPL14	24.1573	0.0145981	158.811	68.4594	5.76132	0.104906	155.838	242.897	0.00984966	3.54804	3
CBR3	10.1124	0.0147913	149.027	60.8166	5.76132	0.314554	162.191	174.355	0.02353	2.8669	3
AHSA1	14.0449	0.0159555	152.382	63.308	4.66392	0.331078	160.232	200.419	0.014141	3.16578	3
PRDX5	15.7303	0.0160689	147.688	68.0272	3.56653	0.969906	162.905	174.8	0.377264	2.56956	3
KLC3	13.4831	0.016245	155.121	66.0604	1.64609	0.116916	165.265	80.8603	0.711284	1.22403	3
TIMM44	21.3483	0.0167699	157.369	75.3885	4.8011	0.531743	161.373	126.111	0.0720034	1.67281	3
KRBA1	16.8539	0.0174792	150.7	59.5121	5.34979	0.154763	163.263	92.2911	0.622729	1.5508	3
LRRC69	12.9213	0.0179184	158.116	67.9667	12.3457	0.294215	168.965	129.55	0.148482	1.90608	3
CHPF	10.1124	0.018075	148.083	46.8471	3.01783	0.510864	162.94	81.0413	0.624009	1.72991	3
FFAR3	8.98876	0.0183401	146.437	33.0529	4.8011	0.63379	166.644	134.906	0.0425102	4.08152	3
SENP3	13.4831	0.0190455	154.196	66.8203	2.19479	0.299857	161.4	129.833	0.106299	1.94302	3
SLC3A2	14.6067	0.0190944	151.469	60.674	5.07545	0.400912	164.784	152.345	0.0257894	2.51088	3
NGEF	11.7978	0.0214462	149.552	61.2238	3.56653	0.840045	163.427	65.3885	0.374782	1.06802	3
RNF122	10.1124	0.0221522	149.032	66.7745	4.93827	0.447816	163.348	170.981	0.0134675	2.56057	3
SHCBP1	7.86517	0.0222936	148.506	60.4423	5.34979	0.117367	163.103	140.42	0.616864	2.32321	3
MFSD10	10.1124	0.0228663	147.696	46.0409	2.74348	0.353834	163.247	77.148	0.723445	1.67564	3
TYSND1	13.4831	0.0235098	153.446	64.9894	3.97805	0.246304	160.642	139.309	0.0433175	2.14357	3
CFDP1	10.6742	0.0235472	148.233	51.6954	3.15501	0.163111	166.508	84.5486	0.551501	1.63551	3
PDZD7	6.17978	0.0235549	146.783	49.0944	4.11523	0.744722	162.5	109.907	0.191484	2.23869	3
LSM2	22.4719	0.0248194	156.228	69.4789	9.0535	0.150745	158.599	128.345	0.0229985	1.84725	3
CDCA7L	12.9213	0.0249558	157.418	75.6653	8.64198	0.443138	160.264	119.629	0.300537	1.58102	3
PLEKHJ1	14.6067	0.0261603	148.364	53.4471	1.92044	0.102726	163.673	57.8051	0.87118	1.08154	3
DRAP1	16.8539	0.0264416	148.957	56.7181	5.76132	0.6802	165.316	108.417	0.101028	1.91151	3
RTN4IP1	20.7865	0.0265086	152.919	74.9622	8.36763	0.690794	162.605	119.648	0.200998	1.59611	3
GAR1	12.9213	0.026571	151.387	67.2057	4.52675	0.688937	163.021	85.8264	0.343265	1.27707	3
IZUMO1	14.0449	0.0270497	148.854	72.6827	3.01783	0.554001	165.684	92.8764	0.130381	1.27783	3
TMEM161A	19.1011	0.0292067	149.904	66.7403	5.21262	0.664464	162.861	108.352	0.203915	1.62349	3
FRAT2	10.6742	0.0297342	148.446	49.0605	3.7037	0.323361	161.417	117.589	0.095293	2.39681	3
SPEG	14.6067	0.0300615	150.158	73.1425	4.2524	0.145483	161.793	101.054	0.0152919	1.3816	3
NDUFB6	17.4157	0.0305551	147.377	57.0985	4.11523	0.32725	159.482	194.784	0.18651	3.41136	3
SDC1	13.4831	0.0317958	149.287	56.2149	4.8011	0.905764	163.097	88.7113	0.139788	1.57807	3
PYROXD2	5.05618	0.0324172	145.297	63.6997	2.88066	0.848125	162.384	120.956	0.0919009	1.89884	3
TIMM13	13.4831	0.0324261	148.474	55.158	2.19479	0.63557	163.252	72.8579	0.522002	1.32089	3
NUBP2	23.0337	0.0325286	149.778	53.2339	11.6598	0.634864	165.417	147.489	0.0190071	2.77059	3
ZNF598	23.5955	0.0332329	156.101	76.327	8.77915	0.486916	169.254	104.552	0.173548	1.36979	3
MACROD1	12.3596	0.0332928	147.099	51.9065	3.29218	0.643064	164.921	125.508	0.176197	2.41796	3
ATP6V1E2	19.1011	0.0338613	149.635	66.9954	5.34979	0.902292	163.219	151.898	0.27831	2.2673	3
ZFAND2A	8.98876	0.0354768	146.836	52.0335	3.97805	0.719508	161.992	120.217	0.195102	2.31038	3
COL13A1	14.0449	0.037483	150.74	64.4341	4.52675	0.296307	160.277	115.802	0.0536905	1.79722	3
DCPS	10.1124	0.0380511	147.564	67.6162	5.21262	0.308687	160.603	127.529	0.0708531	1.88607	3
FAM171A2	15.1685	0.0380819	154.442	69.982	6.31001	0.218469	159.891	133.448	0.0152195	1.90689	3
RGS10	12.3596	0.0391879	154.732	72.2779	3.15501	0.941488	163.079	159.03	0.192237	2.20026	3
WDR46	26.9663	0.0403651	149.684	59.6337	6.03567	0.417033	160.909	132.84	0.251124	2.2276	3
TESK1	14.0449	0.0403733	152.359	66.7785	5.34979	0.259247	159.773	145.006	0.0739986	2.17144	3
ZWINT	5.61798	0.0405447	147.207	52.8336	6.03567	0.862664	161.644	116.559	0.123434	2.20615	3
KIF19	12.3596	0.0405455	149.547	60.9774	3.84088	0.509782	162.203	97.5094	0.0952777	1.59911	3
NTHL1	24.7191	0.0406183	151.019	60.963	11.3855	0.779985	165.89	140.682	0.0640301	2.30766	3
FKBPL	21.3483	0.0413275	152.987	75.2925	6.31001	0.176253	158.682	238.898	0.0502071	3.17294	3
FOXRED1	11.236	0.0426564	149.604	59.9983	4.11523	0.247847	162.699	100.838	0.729118	1.68067	3
CDH24	8.98876	0.0435738	146.787	54.658	5.21262	0.8024	163.162	102.246	0.0918586	1.87066	3
ABCD1	14.0449	0.0448986	149.376	64.2061	5.76132	0.685003	162.155	170.197	0.122899	2.65079	3
ARHGAP27	12.3596	0.0454708	148.956	62.7393	2.46914	0.173068	160.085	152.14	0.100226	2.42495	3
LSM7	13.4831	0.0463499	146.291	55.1143	2.74348	0.103303	163.68	67.0651	0.932429	1.21684	3
METTL1	14.0449	0.0475462	154.358	77.1147	6.31001	0.514167	159.141	215.353	0.0644887	2.79263	3
TBL3	25.2809	0.0479342	152.009	65.196	13.0316	0.641428	163.798	159.668	0.0295509	2.44905	3
C2CD4C	7.30337	0.0483943	150.521	66.5587	2.33196	0.886463	163.535	69.7233	0.822889	1.04755	3
PRSS33	6.74157	0.0484221	147.629	42.9731	6.99588	0.988576	165.524	151.786	0.0119084	3.53212	3
POLR2J2	16.2921	0.0492911	146.934	68.5492	5.34979	0.5265	163.66	151.41	0.0251729	2.20877	3
SAP30	10.1124	8.02685e-05	158.385	57.2191	6.17284	0.0600767	156.768	245.927	0.000198153	4.298	2
EIF5A	13.4831	0.000147799	152.383	51.8395	3.15501	0.0970663	156.356	264.472	0.0121784	5.10174	2
EIF5AL1	15.7303	0.000299113	153.397	54.2017	8.23045	0.0992026	152.744	241.921	0.0139598	4.46335	2
CHRM1	5.61798	0.000317286	150.068	44.7474	4.52675	0.0770587	160.38	197.821	0.000407869	4.42083	2
GTF2H4	29.2135	0.000775957	158.446	67.6154	7.27023	0.0913574	157.885	128.882	0.00562868	1.9061	2
MAGED4	15.1685	0.00310654	150.396	52.4568	5.48697	0.0994494	157.736	149.436	0.0236707	2.84874	2
SNAI1	10.6742	0.00374772	153.781	66.3242	6.58436	0.0782321	160.787	124.283	0.000452604	1.87387	2
BANP	8.98876	0.00387415	148.544	55.6684	1.64609	8.27634e-06	164.026	35.048	0.559627	0.629586	2
ZNF165	11.236	0.00456655	158.564	71.0227	4.52675	0.0513519	158.972	219.926	0.000938872	3.09656	2
PNMA3	11.7978	0.00599082	149.656	57.1342	3.84088	0.0968492	161.403	140.548	0.00557929	2.45996	2
C1QL4	8.98876	0.00647521	147.614	47.8511	3.15501	0.0553696	157.24	267.575	0.0261884	5.59183	2
MVD	9.55056	0.0069325	146.052	51.4692	0.411523	0.0682442	163.259	24.9534	0.833527	0.484822	2
RPL30	35.3933	0.00757904	181.495	89.6776	19.6159	0.0323692	143.674	206.779	0.00115465	2.3058	2
PPFIA3	16.8539	0.00835811	149.172	69.6018	5.62414	0.0324826	162.654	135.382	0.642849	1.9451	2
TMEM11	14.0449	0.00964324	147.794	51.9123	5.76132	0.0198964	155.261	273.435	0.0112522	5.26724	2
DPY30	14.6067	0.0108433	151.046	60.3347	5.62414	0.0855628	153.808	238.695	0.0316057	3.95618	2
PLCB3	8.42697	0.016389	147.214	48.8326	5.21262	0.0623605	166.112	98.3339	0.641618	2.01369	2
OTX1	12.9213	0.0181422	150.308	66.9085	6.31001	0.0448985	158.239	131.911	0.00513983	1.97152	2
EMILIN3	6.17978	0.0192436	147.748	45.0699	2.88066	0.062003	158.556	282.904	0.005545	6.27701	2
PTOV1	12.9213	0.0211277	151.327	66.3702	5.21262	0.0104504	167.888	76.2594	0.375102	1.149	2
CD7	15.1685	0.0268197	149.585	65.3132	5.76132	0.0552914	159.531	135.739	0.00424743	2.07828	2
EPN1	16.2921	0.0345645	149.693	63.9294	5.48697	0.000884299	166.685	68.2771	0.992168	1.06801	2
ESRRA	16.8539	0.0346811	146.502	71.0383	2.60631	0.0837488	165.364	106.129	0.610382	1.49397	2
AIFM2	11.236	0.0375943	149.72	67.0946	4.2524	0.0180068	158.684	128.262	0.000799968	1.91165	2
ZNF133	15.1685	0.038124	149.559	72.2514	6.99588	0.0604168	158.18	132.026	0.00992642	1.82732	2
DUSP9	13.4831	0.0405569	153.854	73.6956	5.07545	0.00508188	154.716	281.293	0.000308988	3.81696	2
GAA	20.2247	0.0413157	149.49	63.9601	6.85871	0.0846698	159.57	151.34	0.0130854	2.36616	2
CYC1	42.6966	0.000211903	172.663	100.676	23.8683	0.359216	148.718	176.881	0.00303058	1.75692	1
PSORS1C1	15.7303	0.000287773	150.992	90.0018	3.42936	0.416267	161.627	108.918	0.0158728	1.21018	1
GPAA1	34.8315	0.000331046	154.431	105.823	18.7929	0.948231	158.406	168.001	0.0134596	1.58756	1
MRPL36	27.5281	0.000440298	145.929	102.828	8.77915	0.804142	158.786	186.435	0.0527707	1.81307	1
ENY2	51.1236	0.000468522	182.324	103.684	27.7092	0.939351	152.794	165.431	0.0115249	1.59553	1
ZNF517	34.2697	0.000482586	160.952	107.413	21.9479	0.980042	167.838	158.871	0.008515	1.47907	1
RECQL4	42.1348	0.000567245	156.619	110.923	18.107	0.854214	164.379	163.181	0.0193121	1.47113	1
RRS1	39.8876	0.000777439	171.991	100.173	20.8505	0.375458	154.754	185.382	0.00588723	1.85063	1
ARHGAP39	34.8315	0.00112051	165.933	104.707	21.5364	0.406811	160.117	164.542	0.00321114	1.57146	1
CPSF1	38.764	0.0013275	164.68	95.7116	19.8903	0.0737979	157.387	185.991	0.0016415	1.94325	1
CYHR1	32.5843	0.00173637	155.959	104.96	16.5981	0.457147	161.107	170.311	0.00904684	1.62263	1
DGAT1	33.7079	0.00189095	152.515	111.244	20.1646	0.884443	153.157	164.919	0.0144388	1.4825	1
VPS28	32.5843	0.00199872	153.352	95.5721	17.284	0.264871	149.672	180.373	0.00777239	1.88729	1
RRBP1	19.1011	0.00220274	148.752	81.0408	8.23045	0.528705	162.155	174.29	0.173618	2.15064	1
MRPL15	33.1461	0.00239975	161.895	106.026	21.3992	0.944578	149.358	184.533	0.0311554	1.74045	1
COMMD5	44.9438	0.00249541	138.738	120.353	23.1824	0.574007	148.973	174.954	0.0182278	1.45368	1
ECE2	27.5281	0.00395356	161.46	89.2821	9.60219	0.27925	164.279	133.42	0.172863	1.49436	1
NRTN	14.6067	0.00500099	142.231	95.4144	4.38957	0.110665	156.319	242.513	0.00650717	2.54169	1
TSTA3	23.5955	0.00625172	151.062	99.7195	16.1866	0.399703	153.715	180.83	0.0144988	1.81339	1
FBXL6	42.1348	0.00632887	140.309	116.574	20.9877	0.730642	160.584	171.219	0.0558559	1.46875	1
TOMM40	22.4719	0.00739188	146.229	115.921	5.07545	0.672305	160.778	182.476	0.289334	1.57415	1
NQO2	14.0449	0.00755642	157.776	82.6428	5.89849	0.313017	162.307	165.781	0.149644	2.006	1
NDUFB9	44.382	0.00791452	168.738	112.194	27.8464	0.673162	152.209	166.107	0.020444	1.48054	1
BOP1	42.6966	0.00839003	160.998	109.576	21.262	0.85346	160.994	157.154	0.0787517	1.4342	1
CCT3	42.1348	0.00847739	147.189	111.634	24.5542	0.677949	148.791	196.592	0.0291145	1.76103	1
MGST3	35.9551	0.00952825	142.166	119.263	25.3772	0.869189	156.573	179.794	0.0403918	1.50754	1
LSM6	13.4831	0.0096123	149.86	87.7844	5.34979	0.355243	159.928	124.669	0.0136843	1.42017	1
ADAM15	26.9663	0.0098347	152.281	109.341	15.775	0.813058	160.074	122.456	0.0825812	1.11995	1
RPP25	19.6629	0.0102363	152.731	77.5742	6.31001	0.599855	163.991	132.977	0.132282	1.7142	1
LYNX1	23.0337	0.0102903	147.544	116.549	13.9918	0.349253	162.823	160.749	0.0137162	1.37924	1
VPS72	53.9326	0.0114954	145.401	123.332	30.1783	0.257824	148.656	191.808	0.0200943	1.55522	1
ACTR3B	16.8539	0.0127755	141.996	98.4961	6.99588	0.0775584	156.967	171.188	0.0187793	1.73802	1
NPM2	15.7303	0.013247	147.54	74.0433	4.2524	0.618558	163.187	155.518	0.087986	2.10036	1
MRPS26	21.3483	0.0133523	147.505	98.9966	5.48697	0.267867	159.708	220.079	0.016692	2.22309	1
MRPL24	34.2697	0.0137365	158.435	111.215	23.7311	0.744072	155.204	182.466	0.0420245	1.64065	1
ZNF696	38.764	0.0149356	137.772	118.68	27.1605	0.428803	154.377	170.243	0.0219027	1.43447	1
PMVK	25.8427	0.0149636	150.336	112.629	14.5405	0.205095	147.994	204.269	0.0255264	1.81364	1
PTP4A3	23.5955	0.0157471	148.056	116.678	13.5802	0.248095	162.916	148.06	0.0116195	1.26897	1
BOLA1	40.4494	0.0162258	149.469	126.5	20.439	0.582396	154.276	173.819	0.057999	1.37407	1
UCK2	32.5843	0.0168576	140.173	120.013	21.9479	0.546191	154.37	178.665	0.0435365	1.48872	1
RAB6B	16.8539	0.0178815	148.13	76.3623	7.13306	0.891206	164.061	144.057	0.155654	1.88649	1
TSNARE1	32.5843	0.0179007	150.028	127.709	18.3813	0.522829	168.584	151.049	0.033302	1.18276	1
FAM83H	38.2022	0.0179778	126.567	121.86	26.8861	0.30606	148.516	174.472	0.0212307	1.43174	1
TMSB15B	14.6067	0.0181642	144.089	104.215	6.44719	0.476656	160.972	119.799	0.0350945	1.14954	1
GINS4	28.0899	0.0199713	168.108	107.818	18.3813	0.960678	154.523	190.117	0.0501264	1.76332	1
EFNA4	38.764	0.0201062	157.043	119.161	22.6337	0.433822	149.622	193.206	0.0535329	1.62138	1
SHARPIN	36.5169	0.0206393	150.576	116.582	20.439	0.251752	148.297	180.906	0.0205106	1.55175	1
TAGLN2	35.3933	0.020654	133.004	124.9	20.1646	0.508531	156.066	184.65	0.177228	1.47838	1
SNRPB	24.7191	0.0209704	149.953	78.0356	6.31001	0.234217	161.609	184.385	0.0180054	2.36284	1
PSRC1	23.0337	0.0219664	158.406	99.7611	5.76132	0.214161	156.65	253.307	0.0387019	2.53914	1
TBRG4	26.9663	0.0227903	141.758	140.248	6.85871	0.885026	160.132	183.513	0.178068	1.30849	1
CHMP4C	30.3371	0.0228418	157.524	104.723	22.4966	0.281398	163.082	156.394	0.0156219	1.49341	1
HSD11B1L	16.8539	0.0232564	153.721	80.5358	5.34979	0.663368	162.994	105.563	0.235672	1.31076	1
HSF1	51.6854	0.0232805	135.248	124.157	25.1029	0.847172	151.984	165.2	0.0973616	1.33058	1
LAPTM4B	41.0112	0.0235992	195.121	107.028	31.2757	0.685221	158.818	172.41	0.103137	1.61089	1
MAF1	44.9438	0.0251154	153.863	116.787	23.1824	0.301943	148.556	177.457	0.025595	1.51949	1
LY6E	26.9663	0.0260801	151.838	98.9593	14.2661	0.393859	161.317	164.787	0.0337988	1.6652	1
PPP1R16A	32.0225	0.0281009	147.925	122.487	17.4211	0.622703	160.825	165.028	0.0763657	1.3473	1
S100A11	27.5281	0.0308299	131.158	126.624	16.1866	0.794509	159.989	182.666	0.0637526	1.44258	1
PSMA7	35.3933	0.0331369	151.919	82.1933	10.5624	0.889794	160.28	113.993	0.283013	1.38689	1
MRPS21	36.5169	0.033488	133.98	125.353	20.3018	0.574711	155.943	179.825	0.059181	1.43455	1
DSCC1	48.8764	0.0341496	141.525	136.4	30.727	0.442542	160.39	158.345	0.15988	1.16089	1
ZSWIM4	21.3483	0.0353646	145.643	126.279	6.31001	0.544041	162.029	108.403	0.0471761	0.858441	1
MARCKSL1	13.4831	0.0359519	152.317	80.0304	4.93827	0.0587385	157.945	252.344	0.00535776	3.1531	1
PUF60	50.5618	0.0364062	149.72	124.142	23.3196	0.564829	150.187	174.382	0.0778277	1.4047	1
POLR1C	25.8427	0.0371354	164.419	95.5919	9.46502	0.0668535	155.383	240.601	0.00617312	2.51696	1
SPNS2	11.7978	0.0385705	145.336	82.825	3.15501	0.573265	163.625	99.9387	0.666528	1.20663	1
SF3B5	15.1685	0.0387754	147.843	77.3897	4.93827	0.277338	161.062	117.199	0.0694955	1.5144	1
THOC6	28.0899	0.0390521	152.276	79.1364	14.8148	0.0200447	156.577	189.964	0.00149401	2.40046	1
RPP38	28.6517	0.0393846	137.313	123.661	12.0713	0.0100557	154.134	220.805	0.00135946	1.78556	1
GNB1L	21.3483	0.0399948	148.824	80.4331	4.66392	0.905747	164.491	100.725	0.220662	1.25228	1
NXN	13.4831	0.0400388	144.779	90.9707	4.38957	0.322125	166.596	124.416	0.512526	1.36765	1
DHRS11	12.3596	0.0402377	145.339	75.5541	5.34979	0.346943	164.349	118.867	0.0124359	1.57327	1
LEMD2	28.0899	0.040506	147.747	86.3905	7.13306	0.8207	162.511	90.6932	0.149035	1.04981	1
TRIP10	16.2921	0.0413747	147.718	75.8678	4.66392	0.868558	165.235	140.58	0.278466	1.85296	1
SSPO	14.0449	0.0422631	133.442	131.671	5.48697	0.967459	165.157	132.267	0.0928905	1.00452	1
PDSS1	16.2921	0.0450653	151.76	105.202	8.91632	0.388556	160.55	162.696	0.0528365	1.54651	1
PRSS27	10.1124	0.0451348	139.826	98.8423	7.9561	0.573006	167.007	127.009	0.0184128	1.28497	1
TIGD5	37.0787	0.0461171	149.236	111.941	19.7531	0.13707	151.463	188.257	0.0231423	1.68175	1
SNHG6	29.2135	0.0461423	162.717	88.3412	15.6379	0.413499	155.669	182.752	0.0452982	2.06871	1
KCNG1	19.1011	0.0467569	149.912	75.1948	7.81893	0.191113	161.157	175.171	0.0206617	2.32957	1
MRPL2	33.1461	0.0477992	160.441	105.986	6.99588	0.0466564	159.273	137.066	0.00737841	1.29325	1
FAM189B	42.1348	0.0486069	137.87	128.584	32.7846	0.884548	149.267	176.635	0.105631	1.37369	1

## Sheet: Table S5
Table S5
Univariate COX regression survival analysis for TNBC Balck/African American patients
GENE	HAZARD RATIO	PVALUE	C-INDEX
ACYP2	3.1	0.018	0.68
ADAT2	2.1	0.032	0.65
AGAP4	4.6	0.0026	0.79
CHCHD1	2.1	0.05	0.66
MAP2K3	6.5	0.0016	0.78
MRPL18	3.3	0.016	0.75
RPP21	3	0.015	0.65
ZNRD1	3.2	0.045	0.65
COQ9	3	0.063	0.66
RIN3	2.6	0.09	0.67
UQCRB	2	0.092	0.69
GPT2	1.9	0.01	0.72
POMC	1.9	0.00039	0.73
LINGO3	1.8	0.0023	0.69
ITPA	1.7	0.18	0.73
OBSL1	1.6	0.054	0.6
TMPRSS13	1.6	0.12	0.69
BCL2L12	1.6	0.2	0.61
ATG9B	1.6	0.024	0.69
ATP6V1C2	1.5	0.039	0.66
CUZD1	1.5	0.17	0.55
SMOX	1.5	0.31	0.6
CPNE2	1.5	0.3	0.61
PCSK1N	1.5	0.017	0.71
TMEM147	1.5	0.27	0.6
RCOR2	1.4	0.15	0.61
UROC1	1.4	0.21	0.56
PNLDC1	1.3	0.0028	0.68
ADAM11	1.3	0.22	0.54
ARID3C	1.2	0.43	0.43
MDFI	1.2	0.29	0.51
PHKG1	1.1	0.44	0.49

## Sheet: Table S6
Table S6
Multivariate COX regression survival analysis for TNBC Balck/African American patients
	Model 1			Model 2
	C-Index	0.93		C-Index	0.91
	P-value	0.0001		P-value	2e-05
GENE	HAZARD RATIO	PVALUE		HAZARD RATIO	PVALUE
MAP2K3	27.9825	0.00227314		13.4202	0.0267501
AGAP4	5.68593	0.0174552		4.36252	0.00185106
ACYP2	3.68142	0.0472984		2.67272	0.0231679
CHCHD1	0.275784	0.131615
ZNRD1	2.78741	0.33597
ADAT2	1.54424	0.476389
RPP21	1.06446	0.960132
MRPL18	1.04497	0.960302

## Sheet: Table S7
Table S7
Analysis of genomic alterations of MKK3
Cancer type	Mutations, %	Amplification and overexpreesion, %	Deletion and underexpression, %
Acute Myeloid Leukemia	0	4	0
Adrenocortical Carcinoma	1.3	4	0
Bladder Urothelial Carcinoma	1.2	5	1
Brain Lower Grade Glioma	0.4	5	0
Breast Invasive Carcinoma	0.4	6	0.5
Cervical Squamous Cell Carcinoma	0.7	4	1.1
Cholangiocarcinoma	0	6	0
Colorectal Adenocarcinoma	1.1	4	6
Diffuse Large B-Cell Lymphoma	5	2.7	2.7
Esophageal Adenocarcinoma	0.6	6	1.7
Glioblastoma Multiforme	0	7	0.7
Head and Neck Squamous Cell Carcinoma	0.8	5	1.4
Kidney Chromophobe	0	3	0
Kidney Renal Clear Cell Carcinoma	0	5	0
Liver Hepatocellular Carcinoma	0.9	4	0.9
Lung Adenocarcinoma	2.5	5	2.6
Lung Squamous Cell Carcinoma	1.7	5	0.9
Mesothelioma	1.2	4	0
Ovarian Serous Cystadenocarcinoma	0.5	3	0
Pancreatic Adenocarcinoma	0	5	0
Prostate Adenocarcinoma	0	6	0.2
Skin Cutaneous Melanoma	4	4	0.3
Stomach Adenocarcinoma	2.7	4	1.7
Testicular Germ Cell Tumors	0	4	0
Thymoma	0	8	0
Thyroid Carcinoma	0	3	0
Uterine Carcinosarcoma	0	7	1.8
Uterine Corpus Endometrial Carcinoma	5	5	0.2
Uveal Melanoma	1.3	4	0

## Sheet: Table S8
Table S8
Genomic status of MKK3 (MAP2K3 gene) and p38 (MAPK14 gene) in BRCA patients and associated clinical data
TCGA_PATIENT_ID: TCGA patient ID number MAP2K3_EXP: mRNA expression of MAP2K3 gene MAP2K3_CNA: MAP2K3 DNA copy number MAPK14_EXP: mRNA expression of MAPK14 gene MAPK14_CNA: MAPK14 DNA copy number AGE_AT_INITIAL_PATHOLOGIC_DIAGNOSIS: patient age at the initial pathologic diagnosis GENDER: patient gender RACE: patient race as indicated in the PanCancer Atlas dataset HISTOLOGICAL_TYPE: histological …
TCGA_PATIENT_ID	MAP2K3_EXP	MAP2K3_CNA	MAPK14_EXP	MAPK14_CNA	AGE_AT_INITIAL_PATHOLOGIC_DIAGNOSIS	GENDER	RACE	HISTOLOGICAL_TYPE	SUBTYPE	VITAL_STATUS	OS_TIME
TCGA-A1-A0SP	852.609	-1	969.719	-1	40	FEMALE	[Not Available]	Infiltrating Ductal Carcinoma	TNBC	Alive	584
TCGA-A8-A06N	395.365	0	1582.84	0	66	FEMALE	[Not Available]	Infiltrating Ductal Carcinoma	LUMB	Alive	0
TCGA-A8-A06O	431.376	-1	1611.63	-1	60	FEMALE	[Not Available]	Infiltrating Ductal Carcinoma	LUMB	Alive	396
TCGA-A8-A06P	1098.15	0	1516.85	0	63	FEMALE	[Not Available]	Infiltrating Ductal Carcinoma	LUMA	Alive	396
TCGA-A8-A06Q	890.328	1	1371.73	0	63	FEMALE	[Not Available]	Infiltrating Ductal Carcinoma	LUMB	Alive	31
TCGA-A8-A06R	658.896	-1	1049.97	-1	69	FEMALE	[Not Available]	Infiltrating Ductal Carcinoma	LUMB	Alive	547
TCGA-A8-A06T	785.573	0	1558.86	0	75	FEMALE	[Not Available]	Infiltrating Ductal Carcinoma	LUMA	Alive	1614
TCGA-A8-A06U	1144.3	-1	1507.2	-1	80	FEMALE	[Not Available]	Infiltrating Ductal Carcinoma	LUMA	Dead	883
TCGA-A8-A06X	676.602	0	1162.94	0	77	FEMALE	[Not Available]	Infiltrating Ductal Carcinoma	LUMB	Dead	943
TCGA-A8-A06Y	852.676	0	1236.15	-1	66	FEMALE	[Not Available]	Infiltrating Ductal Carcinoma	LUMA	Alive	791
TCGA-A8-A06Z	856.691	0	797.163	-1	84	FEMALE	[Not Available]	Infiltrating Ductal Carcinoma	LUMB	Alive	31
TCGA-A8-A075	826.82	-1	2040.52	1	42	FEMALE	[Not Available]	Infiltrating Ductal Carcinoma	LUMB	Alive	518
TCGA-A8-A076	543.361	-1	2454.55	1	66	FEMALE	[Not Available]	Infiltrating Ductal Carcinoma	LUMB	Alive	1642
TCGA-A8-A079	571.961	-1	1331.98	-1	69	FEMALE	[Not Available]	Infiltrating Ductal Carcinoma	LUMB	Alive	274
TCGA-A8-A07B	357.565	-1	1535.08	0	69	FEMALE	[Not Available]	Infiltrating Ductal Carcinoma	LUMA	Alive	1308
TCGA-A8-A07E	812.321	-1	1627.51	0	81	FEMALE	[Not Available]	Infiltrating Ductal Carcinoma	LUMA	Alive	608
TCGA-A8-A07F	568.749	0	2037.56	1	65	FEMALE	[Not Available]	Infiltrating Ductal Carcinoma	LUMA	Alive	577
TCGA-A8-A07G	613.668	-1	1405.91	0	65	FEMALE	[Not Available]	Infiltrating Ductal Carcinoma	LUMA	Alive	577
TCGA-A8-A07I	584.28	-1	2004.19	1	69	FEMALE	[Not Available]	Infiltrating Ductal Carcinoma	HER2	Alive	426
TCGA-A8-A07J	809.201	0	1194.71	-1	35	FEMALE	[Not Available]	Infiltrating Ductal Carcinoma	LUMA	Alive	365
TCGA-A8-A07L	647.361	-1	1644.28	0	58	FEMALE	[Not Available]	Infiltrating Ductal Carcinoma	LUMB	Alive	975
TCGA-A8-A07O	943.182	0	1619.62	0	51	FEMALE	[Not Available]	Infiltrating Ductal Carcinoma	TNBC	Alive	304
TCGA-A8-A07P	656.876	1	1885.63	0	68	FEMALE	[Not Available]	Infiltrating Ductal Carcinoma	LUMA	Alive	334
TCGA-A8-A07R	845.438	-1	1822.93	-1	80	FEMALE	[Not Available]	Infiltrating Ductal Carcinoma	TNBC	Alive	273
TCGA-A8-A07S	809.305	0	1086.77	0	73	FEMALE	[Not Available]	Mixed Histology (please specify)	LUMB	Alive	243
TCGA-A8-A07U	1296.16	0	1934.84	1	66	FEMALE	[Not Available]	Infiltrating Ductal Carcinoma	TNBC	Alive	760
TCGA-A8-A07W	1570.19	1	1719.87	1	76	FEMALE	[Not Available]	Infiltrating Ductal Carcinoma	LUMB	Alive	304
TCGA-A8-A07Z	922.683	0	1491.13	0	85	FEMALE	[Not Available]	Infiltrating Ductal Carcinoma	LUMA	Alive	1371
TCGA-A8-A081	554.746	-1	1274.38	-1	80	FEMALE	[Not Available]	Infiltrating Ductal Carcinoma	LUMB	Alive	0
TCGA-A8-A082	699.2	0	992.8	0	58	FEMALE	[Not Available]	Infiltrating Ductal Carcinoma	LUMB	Alive	549
TCGA-A8-A083	690.649	0	1025.19	0	67	FEMALE	[Not Available]	Infiltrating Ductal Carcinoma	LUMA	Alive	0
TCGA-A8-A086	782.874	1	1515.12	0	59	FEMALE	[Not Available]	Infiltrating Ductal Carcinoma	LUMA	Alive	396
TCGA-A8-A08A	1108.24	0	1164.68	0	89	FEMALE	[Not Available]	Infiltrating Ductal Carcinoma	LUMA	Alive	30
TCGA-A8-A08B	666.961	-1	1822.44	1	52	FEMALE	[Not Available]	Infiltrating Ductal Carcinoma	HER2	Alive	1156
TCGA-A8-A08C	742.635	0	1717.24	1	65	FEMALE	[Not Available]	Infiltrating Ductal Carcinoma	LUMA	Alive	881
TCGA-A8-A08G	675.227	1	1236.42	-1	41	FEMALE	[Not Available]	Infiltrating Ductal Carcinoma	LUMB	Alive	607
TCGA-A8-A08H	1075.4	0	1798.42	0	66	FEMALE	[Not Available]	Infiltrating Ductal Carcinoma	NORMAL	Alive	0
TCGA-A8-A08I	586.994	-1	1773.77	1	53	FEMALE	[Not Available]	Infiltrating Ductal Carcinoma	LUMB	Alive	365
TCGA-A8-A08J	799.401	-1	1328.34	-1	52	FEMALE	[Not Available]	Infiltrating Ductal Carcinoma	HER2	Dead	1127
TCGA-A8-A08L	614.213	-1	1358.82	0	89	FEMALE	[Not Available]	Infiltrating Ductal Carcinoma	HER2	Dead	304
TCGA-A8-A08O	349.474	-1	1808.18	0	45	FEMALE	[Not Available]	Infiltrating Ductal Carcinoma	LUMA	Alive	943
TCGA-A8-A08P	654.202	0	1655.01	1	70	FEMALE	[Not Available]	Infiltrating Ductal Carcinoma	LUMB	Alive	943
TCGA-A8-A08R	673.195	-1	1664.32	1	52	FEMALE	[Not Available]	Infiltrating Ductal Carcinoma	TNBC	Alive	30
TCGA-A8-A08T	746.423	0	1255.57	0	64	FEMALE	[Not Available]	Infiltrating Ductal Carcinoma	LUMA	Dead	3409
TCGA-A8-A08X	1540.44	1	1117.64	-1	43	FEMALE	[Not Available]	Infiltrating Ductal Carcinoma	HER2	Alive	1308
TCGA-A8-A08Z	601.828	0	1508.49	0	76	FEMALE	[Not Available]	Infiltrating Ductal Carcinoma	LUMA	Alive	1217
TCGA-A8-A090	1026.83	1	1646.62	0	74	FEMALE	[Not Available]	Infiltrating Ductal Carcinoma	LUMA	Alive	0
TCGA-A8-A091	585.312	0	1234.27	0	61	FEMALE	[Not Available]	Infiltrating Ductal Carcinoma	LUMA	Alive	1004
TCGA-A8-A092	492.287	-1	2099.21	1	48	FEMALE	[Not Available]	Infiltrating Ductal Carcinoma	LUMB	Alive	942
TCGA-A8-A093	535.34	1	1356.35	0	61	FEMALE	[Not Available]	Infiltrating Ductal Carcinoma	LUMA	Alive	546
TCGA-A8-A094	1208.62	-1	2332.92	0	75	FEMALE	[Not Available]	Infiltrating Ductal Carcinoma	HER2	Alive	0
TCGA-A8-A095	544.035	0	1394	0	45	FEMALE	[Not Available]	Infiltrating Ductal Carcinoma	LUMB	Alive	1277
TCGA-A8-A096	634.065	0	1354.44	0	73	FEMALE	[Not Available]	Infiltrating Ductal Carcinoma	LUMB	Alive	0
TCGA-A8-A097	875.125	2	1669.83	0	65	FEMALE	[Not Available]	Infiltrating Ductal Carcinoma	LUMA	Alive	365
TCGA-A8-A099	560.82	0	1482.03	0	76	FEMALE	[Not Available]	Infiltrating Ductal Carcinoma	LUMA	Alive	304
TCGA-A8-A09A	379.248	-1	1629.81	0	40	FEMALE	[Not Available]	Infiltrating Ductal Carcinoma	LUMA	Alive	304
TCGA-A8-A09B	845.678	1	1493.17	1	58	FEMALE	[Not Available]	Infiltrating Ductal Carcinoma	LUMA	Alive	365
TCGA-A8-A09C	537.521	-1	1731.42	1	69	FEMALE	[Not Available]	Infiltrating Ductal Carcinoma	LUMB	Alive	31
TCGA-A8-A09D	1001.6	0	1874.1	0	47	FEMALE	[Not Available]	Infiltrating Ductal Carcinoma	LUMA	Alive	1522
TCGA-A8-A09G	643.098	-1	1538.11	0	79	FEMALE	[Not Available]	Infiltrating Ductal Carcinoma	HER2	Alive	0
TCGA-A8-A09I	547.257	-1	1776.53	0	84	FEMALE	[Not Available]	Infiltrating Ductal Carcinoma	LUMB	Alive	1371
TCGA-A8-A09M	507.869	-1	1180.05	-1	75	FEMALE	[Not Available]	Infiltrating Ductal Carcinoma	LUMB	Alive	1006
TCGA-A8-A09N	785.075	-1	1890.46	1	57	FEMALE	[Not Available]	Infiltrating Ductal Carcinoma	LUMB	Alive	31
TCGA-A8-A09Q	1101.08	1	2266.6	1	83	FEMALE	[Not Available]	Infiltrating Ductal Carcinoma	LUMB	Alive	761
TCGA-A8-A09R	785.031	1	1231.23	-1	82	FEMALE	[Not Available]	Infiltrating Ductal Carcinoma	LUMB	Alive	273
TCGA-A8-A09T	610.063	0	1023.58	-1	68	FEMALE	[Not Available]	Infiltrating Lobular Carcinoma	LUMA	Alive	579
TCGA-A8-A09V	470.718	0	1341.22	0	51	FEMALE	[Not Available]	Infiltrating Lobular Carcinoma	LUMA	Alive	457
TCGA-A8-A09W	847.049	0	1796.41	0	70	FEMALE	[Not Available]	Infiltrating Lobular Carcinoma	LUMB	Alive	30
TCGA-A8-A09X	1229.85	1	1427.3	0	62	FEMALE	[Not Available]	Infiltrating Lobular Carcinoma	HER2	Dead	426
TCGA-A8-A09Z	1883.65	0	1278.73	0	83	FEMALE	[Not Available]	Infiltrating Lobular Carcinoma	LUMB	Alive	0
TCGA-A8-A0A1	738.454	0	953.313	-2	84	FEMALE	[Not Available]	Infiltrating Lobular Carcinoma	LUMA	Alive	365
TCGA-A8-A0A2	362.242	-1	1407.08	0	66	FEMALE	[Not Available]	Infiltrating Lobular Carcinoma	LUMA	Alive	579
TCGA-A8-A0A4	781.701	0	963.633	-1	73	FEMALE	[Not Available]	Infiltrating Lobular Carcinoma	LUMA	Alive	396
TCGA-A8-A0A6	695.305	0	1426.79	-1	64	FEMALE	[Not Available]	Infiltrating Lobular Carcinoma	LUMA	Alive	640
TCGA-A8-A0A7	698.469	-1	2286.22	0	57	FEMALE	[Not Available]	Infiltrating Lobular Carcinoma	HER2	Alive	30
TCGA-A8-A0A9	668.424	0	1148.8	-1	80	FEMALE	[Not Available]	Infiltrating Ductal Carcinoma	LUMA	Alive	822
TCGA-A8-A0AB	1196.31	1	1713.66	0	54	FEMALE	[Not Available]	Infiltrating Lobular Carcinoma	LUMA	Alive	518
TCGA-A8-A0AD	436.601	-1	1086.71	1	83	FEMALE	[Not Available]	Mixed Histology (please specify)	LUMA	Alive	1157
TCGA-AO-A0JM	472.767	-2	1442.81	1	40	FEMALE	[Not Available]	Infiltrating Ductal Carcinoma	LUMB	Alive	2184
TCGA-AR-A0TV	939.619	0	1668.57	1	66	FEMALE	[Not Available]	Infiltrating Ductal Carcinoma	LUMB	Alive	2288
TCGA-AR-A0TX	1669.37	0	1871.74	0	64	FEMALE	[Not Available]	Infiltrating Ductal Carcinoma	HER2	Alive	1972
TCGA-E2-A1BC	474.94	-1	1451.87	0	63	FEMALE	[Not Available]	Infiltrating Ductal Carcinoma	LUMA	Alive	501
TCGA-E2-A1LA	575.879	-1	1262.57	0	59	FEMALE	[Not Available]	Infiltrating Ductal Carcinoma	LUMA	Alive	748
TCGA-E2-A2P6	567.478	0	900.053	0	77	FEMALE	[Not Available]	Infiltrating Lobular Carcinoma	LUMA	Alive	1051
TCGA-HN-A2NL	1024.95	1	1147.58	1	56	FEMALE	[Not Evaluated]	Infiltrating Lobular Carcinoma	TNBC	Alive	79
TCGA-HN-A2OB	831.835	0	1160.97	0	45	FEMALE	[Not Evaluated]	Infiltrating Lobular Carcinoma	LUMA	Dead	1900
TCGA-OK-A5Q2	1295.17	0	1231.65	0	59	FEMALE	[Not Evaluated]	Infiltrating Lobular Carcinoma	LUMA	Alive	64
TCGA-A2-A0T1	1791.78	-1	1199.27	0	55	FEMALE	AMERICAN INDIAN OR ALASKA NATIVE	Infiltrating Ductal Carcinoma	HER2	Alive	521
TCGA-A1-A0SK	472.108	-1	1370.63	1	54	FEMALE	ASIAN	Other, specify	TNBC	Dead	967
TCGA-A2-A0CR	1787.09	-1	1001	-1	54	FEMALE	ASIAN	Infiltrating Lobular Carcinoma	LUMA	Alive	3283
TCGA-A2-A0CV	1366.74	-1	1096.54	-1	41	FEMALE	ASIAN	Infiltrating Ductal Carcinoma	LUMA	Alive	3011
TCGA-AC-A2FF	796.135	0	1807.41	0	40	FEMALE	ASIAN	Infiltrating Lobular Carcinoma	LUMA	Alive	2759
TCGA-AO-A03L	1059.28	1	1598.35	1	34	FEMALE	ASIAN	Infiltrating Ductal Carcinoma	LUMA	Alive	2442
TCGA-AO-A126	1097.3	0	796.921	0	39	FEMALE	ASIAN	Infiltrating Ductal Carcinoma	LUMA	Alive	3307
TCGA-AR-A1AS	546.15	-1	1389.46	0	54	FEMALE	ASIAN	Infiltrating Ductal Carcinoma	LUMA	Alive	1150
TCGA-BH-A0HW	1236.33	2	1117.03	0	62	FEMALE	ASIAN	Infiltrating Ductal Carcinoma	LUMB	Alive	1561
TCGA-C8-A12K	1151.45	0	1345.16	1	80	FEMALE	ASIAN	Infiltrating Ductal Carcinoma	TNBC	Alive	0
TCGA-C8-A12L	863.079	-1	1018.6	-1	67	FEMALE	ASIAN	Infiltrating Ductal Carcinoma	HER2	Alive	363
TCGA-C8-A12M	438.799	0	1596.41	0	70	FEMALE	ASIAN	Infiltrating Ductal Carcinoma	LUMB	Alive	358
TCGA-C8-A12N	785.246	0	1091.2	0	58	FEMALE	ASIAN	Infiltrating Ductal Carcinoma	LUMA	Alive	358
TCGA-C8-A12O	678.722	-1	1263.58	-1	50	FEMALE	ASIAN	Infiltrating Ductal Carcinoma	LUMA	Alive	385
TCGA-C8-A12P	863.202	-1	1026.37	-1	55	FEMALE	ASIAN	Infiltrating Ductal Carcinoma	HER2	Alive	358
TCGA-C8-A12Q	577.655	-1	1677.14	0	78	FEMALE	ASIAN	Infiltrating Ductal Carcinoma	HER2	Dead	385
TCGA-C8-A12T	1420.92	0	1396.48	0	43	FEMALE	ASIAN	Infiltrating Ductal Carcinoma	HER2	Alive	0
TCGA-C8-A12U	775.087	-1	1126.73	-1	46	FEMALE	ASIAN	Infiltrating Ductal Carcinoma	LUMB	Alive	385
TCGA-C8-A12V	999.595	0	1759.12	0	55	FEMALE	ASIAN	Infiltrating Ductal Carcinoma	TNBC	Alive	385
TCGA-C8-A12W	805.352	1	1778.59	1	49	FEMALE	ASIAN	Infiltrating Ductal Carcinoma	LUMB	Alive	385
TCGA-C8-A12X	943.885	0	1233.81	1	62	FEMALE	ASIAN	Mucinous Carcinoma	LUMA	Alive	385
TCGA-C8-A12Y	1051.64	0	1013.26	0	44	FEMALE	ASIAN	Infiltrating Ductal Carcinoma	LUMA	Alive	1476
TCGA-C8-A12Z	832.452	-1	1406.27	0	45	FEMALE	ASIAN	Infiltrating Ductal Carcinoma	HER2	Alive	382
TCGA-C8-A130	691.082	-1	1241.37	1	52	FEMALE	ASIAN	Infiltrating Ductal Carcinoma	LUMB	Alive	370
TCGA-C8-A131	1121.75	-1	1239.65	0	82	FEMALE	ASIAN	Infiltrating Ductal Carcinoma	TNBC	Alive	411
TCGA-C8-A132	1835.52	1	1795.75	0	56	FEMALE	ASIAN	Infiltrating Ductal Carcinoma	LUMA	Alive	383
TCGA-C8-A134	894.748	-1	2330.16	1	52	FEMALE	ASIAN	Infiltrating Ductal Carcinoma	TNBC	Alive	383
TCGA-C8-A135	3080.65	1	1970.97	0	64	FEMALE	ASIAN	Infiltrating Ductal Carcinoma	HER2	Alive	393
TCGA-C8-A137	881.572	-1	1419.54	0	34	FEMALE	ASIAN	Infiltrating Ductal Carcinoma	HER2	Alive	379
TCGA-C8-A138	793.117	-1	1072.56	0	54	FEMALE	ASIAN	Infiltrating Ductal Carcinoma	HER2	Alive	380
TCGA-C8-A1HE	664.746	0	1298.14	0	59	FEMALE	ASIAN	Infiltrating Ductal Carcinoma	LUMA	Alive	375
TCGA-C8-A1HF	1050.49	-1	1081.97	0	48	FEMALE	ASIAN	Infiltrating Ductal Carcinoma	HER2	Alive	332
TCGA-C8-A1HG	736.07	-1	1679.62	0	50	FEMALE	ASIAN	Infiltrating Ductal Carcinoma	LUMB	Alive	345
TCGA-C8-A1HI	754.917	-1	1163.3	0	40	FEMALE	ASIAN	Infiltrating Ductal Carcinoma	LUMA	Alive	343
TCGA-C8-A1HJ	783.964	-1	2091.39	2	53	FEMALE	ASIAN	Infiltrating Ductal Carcinoma	TNBC	Alive	5
TCGA-C8-A1HK	746.187	-1	1942.49	1	53	FEMALE	ASIAN	Infiltrating Ductal Carcinoma	HER2	Alive	366
TCGA-C8-A1HL	464.12	-1	1186.37	0	38	FEMALE	ASIAN	Other, specify	LUMB	Alive	317
TCGA-C8-A1HM	747.633	-1	1660.04	1	74	FEMALE	ASIAN	Infiltrating Ductal Carcinoma	LUMB	Alive	375
TCGA-C8-A1HN	639.799	-1	1020.51	0	56	FEMALE	ASIAN	Infiltrating Ductal Carcinoma	LUMB	Alive	394
TCGA-C8-A1HO	311.228	-1	1871.99	1	34	FEMALE	ASIAN	Infiltrating Ductal Carcinoma	LUMA	Alive	375
TCGA-C8-A26V	1267.25	0	1319.37	0	47	FEMALE	ASIAN	Infiltrating Ductal Carcinoma	LUMB	Alive	616
TCGA-C8-A26W	658.781	-1	1591.98	0	58	FEMALE	ASIAN	Infiltrating Ductal Carcinoma	LUMB	Alive	381
TCGA-C8-A26X	1488.29	-1	1008.27	0	58	FEMALE	ASIAN	Infiltrating Ductal Carcinoma	HER2	Alive	376
TCGA-C8-A26Y	2758.76	0	1108.15	-1	90	FEMALE	ASIAN	Infiltrating Ductal Carcinoma	HER2	Alive	394
TCGA-C8-A26Z	361.486	-1	1549.27	0	59	FEMALE	ASIAN	Infiltrating Ductal Carcinoma	LUMA	Alive	470
TCGA-C8-A273	852.618	0	1245.93	0	29	FEMALE	ASIAN	Infiltrating Ductal Carcinoma	LUMA	Alive	513
TCGA-C8-A274	673.489	0	1012.58	-1	63	FEMALE	ASIAN	Infiltrating Ductal Carcinoma	LUMB	Alive	508
TCGA-C8-A275	1254.19	0	1769.93	0	56	FEMALE	ASIAN	Infiltrating Ductal Carcinoma	HER2	Alive	1
TCGA-C8-A278	864.52	-1	1854.63	0	61	FEMALE	ASIAN	Infiltrating Ductal Carcinoma	HER2	Alive	297
TCGA-C8-A27A	413.565	-1	1480.18	-1	48	FEMALE	ASIAN	Infiltrating Ductal Carcinoma	LUMB	Alive	747
TCGA-C8-A27B	946.489	-1	2637.69	2	48	FEMALE	ASIAN	Infiltrating Ductal Carcinoma	TNBC	Alive	439
TCGA-C8-A3M7	675.525	-1	1390.75	0	60	FEMALE	ASIAN	Infiltrating Lobular Carcinoma	LUMA	Dead	1034
TCGA-C8-A3M8	539.733	0	1197.07	0	68	FEMALE	ASIAN	Infiltrating Lobular Carcinoma	LUMB	Alive	394
TCGA-C8-A8HP	1227.4	-1	1434.6	0	59	FEMALE	ASIAN	Metaplastic Carcinoma	HER2	Alive	396
TCGA-C8-A8HQ	826.552	-1	1125.52	0	53	FEMALE	ASIAN	Mucinous Carcinoma	LUMB	Alive	380
TCGA-C8-A8HR	986.14	0	1408.71	-1	49	FEMALE	ASIAN	Infiltrating Lobular Carcinoma	NORMAL	Alive	408
TCGA-EW-A1IX	847.44	0	1503.35	0	48	FEMALE	ASIAN	Other, specify	LUMA	Alive	1208
TCGA-EW-A1IY	625.317	0	1574.01	0	38	FEMALE	ASIAN	Infiltrating Ductal Carcinoma	LUMB	Alive	258
TCGA-JL-A3YW	1599.06	-1	1332.85	0	49	FEMALE	ASIAN	Infiltrating Lobular Carcinoma	HER2	Alive	360
TCGA-JL-A3YX	1367.3	0	1094.77	0	46	FEMALE	ASIAN	Infiltrating Lobular Carcinoma	LUMA	Alive	352
TCGA-PE-A5DD	882.207	-1	1083.5	0	64	FEMALE	ASIAN	Infiltrating Lobular Carcinoma	LUMA	Alive	1953
TCGA-3C-AALI	971.724	-1	1357.26	0	50	FEMALE	BLACK OR AFRICAN AMERICAN	Infiltrating Ductal Carcinoma	HER2	Alive	4005
TCGA-3C-AALJ	810.517	-1	693.563	-1	62	FEMALE	BLACK OR AFRICAN AMERICAN	Infiltrating Ductal Carcinoma	LUMB	Alive	1474
TCGA-3C-AALK	690.939	-1	935.043	0	52	FEMALE	BLACK OR AFRICAN AMERICAN	Infiltrating Ductal Carcinoma	LUMA	Alive	1448
TCGA-5T-A9QA	943.515	1	1254.71	1	52	FEMALE	BLACK OR AFRICAN AMERICAN	Other, specify	LUMB	Alive	303
TCGA-A1-A0SJ	539.918	-1	1365.16	0	39	FEMALE	BLACK OR AFRICAN AMERICAN	Infiltrating Ductal Carcinoma	LUMA	Alive	416
TCGA-A2-A04P	1139	-1	867.22	-1	36	FEMALE	BLACK OR AFRICAN AMERICAN	Infiltrating Ductal Carcinoma	TNBC	Dead	548
TCGA-A2-A04R	844.336	0	1695.55	0	36	FEMALE	BLACK OR AFRICAN AMERICAN	Infiltrating Ductal Carcinoma	LUMB	Alive	3709
TCGA-A2-A0CL	1237.95	0	1498.89	0	37	FEMALE	BLACK OR AFRICAN AMERICAN	Infiltrating Ductal Carcinoma	NORMAL	Alive	3015
TCGA-A2-A0CM	1559.48	-1	1159.34	1	40	FEMALE	BLACK OR AFRICAN AMERICAN	Infiltrating Ductal Carcinoma	TNBC	Dead	754
TCGA-A2-A0CQ	941.849	0	431.264	-1	62	FEMALE	BLACK OR AFRICAN AMERICAN	Infiltrating Ductal Carcinoma	LUMA	Alive	2695
TCGA-A2-A0D0	1410.21	-1	855.848	0	60	FEMALE	BLACK OR AFRICAN AMERICAN	Infiltrating Ductal Carcinoma	TNBC	Alive	2048
TCGA-A2-A0D4	616.362	-1	1550.09	-1	37	FEMALE	BLACK OR AFRICAN AMERICAN	Infiltrating Ductal Carcinoma	LUMB	Alive	767
TCGA-A2-A0EQ	1108.39	-1	1215.34	1	64	FEMALE	BLACK OR AFRICAN AMERICAN	Infiltrating Ductal Carcinoma	HER2	Alive	2426
TCGA-A2-A0YF	722.37	0	1789.32	0	67	FEMALE	BLACK OR AFRICAN AMERICAN	Infiltrating Ductal Carcinoma	LUMA	Alive	1535
TCGA-A2-A259	1788.55	1	1373.29	0	70	FEMALE	BLACK OR AFRICAN AMERICAN	Infiltrating Ductal Carcinoma	LUMA	Alive	1596
TCGA-A2-A25B	675.998	1	1741.68	0	39	FEMALE	BLACK OR AFRICAN AMERICAN	Infiltrating Ductal Carcinoma	LUMB	Alive	1291
TCGA-A2-A25E	770.126	0	1605.66	0	34	FEMALE	BLACK OR AFRICAN AMERICAN	Infiltrating Ductal Carcinoma	LUMB	Alive	3204
TCGA-A2-A3KC	810.226	0	1243.74	0	55	FEMALE	BLACK OR AFRICAN AMERICAN	Infiltrating Lobular Carcinoma	LUMA	Alive	1102
TCGA-A2-A3XS	1095.21	0	1442.88	1	62	FEMALE	BLACK OR AFRICAN AMERICAN	Infiltrating Ductal Carcinoma	TNBC	Dead	1032
TCGA-A2-A3XT	981.253	-1	1149.77	1	45	FEMALE	BLACK OR AFRICAN AMERICAN	Infiltrating Ductal Carcinoma	TNBC	Alive	2770
TCGA-A2-A3XU	2965.77	1	885.565	0	35	FEMALE	BLACK OR AFRICAN AMERICAN	Infiltrating Ductal Carcinoma	TNBC	Dead	912
TCGA-A2-A3XV	1091.18	-1	1449.03	1	46	FEMALE	BLACK OR AFRICAN AMERICAN	Infiltrating Ductal Carcinoma	HER2	Alive	996
TCGA-A2-A3XW	2005.32	-1	850.106	-1	42	FEMALE	BLACK OR AFRICAN AMERICAN	Infiltrating Ductal Carcinoma	NORMAL	Alive	1712
TCGA-A2-A3XX	2240.43	1	1471	1	49	FEMALE	BLACK OR AFRICAN AMERICAN	Infiltrating Ductal Carcinoma	TNBC	Dead	1439
TCGA-A2-A3XY	1827.63	-1	1527.5	1	49	FEMALE	BLACK OR AFRICAN AMERICAN	Infiltrating Ductal Carcinoma	TNBC	Dead	1093
TCGA-A2-A3XZ	949.001	-1	1148.17	0	46	FEMALE	BLACK OR AFRICAN AMERICAN	Infiltrating Ductal Carcinoma	HER2	Alive	1532
TCGA-A2-A3Y0	1309.47	-1	2098.18	1	57	FEMALE	BLACK OR AFRICAN AMERICAN	Infiltrating Ductal Carcinoma	TNBC	Alive	1546
TCGA-A2-A4RX	1410.84	-1	1315.06	0	67	FEMALE	BLACK OR AFRICAN AMERICAN	Metaplastic Carcinoma	TNBC	Alive	742
TCGA-A2-A4S3	1176.44	0	1519.1	0	59	FEMALE	BLACK OR AFRICAN AMERICAN	Infiltrating Ductal Carcinoma	LUMB	Alive	666
TCGA-A7-A13D	1310.45	-1	1439.63	-1	46	FEMALE	BLACK OR AFRICAN AMERICAN	Infiltrating Ductal Carcinoma	TNBC	Alive	965
TCGA-A7-A26G	591.945	-1	3910.34	2	50	FEMALE	BLACK OR AFRICAN AMERICAN	Other, specify	TNBC	Alive	722
TCGA-A7-A2KD	361.38	-2	1083.07	-1	53	FEMALE	BLACK OR AFRICAN AMERICAN	Infiltrating Ductal Carcinoma	LUMB	Alive	679
TCGA-A7-A4SD	1267.66	-1	973.632	-1	52	FEMALE	BLACK OR AFRICAN AMERICAN	Infiltrating Ductal Carcinoma	TNBC	Alive	441
TCGA-A7-A4SE	837.623	-1	2140.4	2	54	FEMALE	BLACK OR AFRICAN AMERICAN	Infiltrating Ductal Carcinoma	TNBC	Alive	644
TCGA-A7-A4SF	982.378	-1	1566.12	1	54	FEMALE	BLACK OR AFRICAN AMERICAN	Infiltrating Ductal Carcinoma	HER2	Alive	545
TCGA-A7-A56D	1275.7	-1	833.778	1	84	FEMALE	BLACK OR AFRICAN AMERICAN	Infiltrating Ductal Carcinoma	LUMA	Alive	448
TCGA-A7-A5ZV	1141.32	0	1349.18	0	62	FEMALE	BLACK OR AFRICAN AMERICAN	Infiltrating Carcinoma NOS	TNBC	Alive	368
TCGA-A7-A5ZW	844.221	0	1331.55	0	47	FEMALE	BLACK OR AFRICAN AMERICAN	Infiltrating Ductal Carcinoma	LUMA	Alive	326
TCGA-A7-A6VV	1952.76	1	1324.62	1	51	FEMALE	BLACK OR AFRICAN AMERICAN	Infiltrating Ductal Carcinoma	TNBC	Alive	313
TCGA-A7-A6VW	1230.56	-1	1379.24	0	48	FEMALE	BLACK OR AFRICAN AMERICAN	Infiltrating Ductal Carcinoma	TNBC	Alive	285
TCGA-A7-A6VX	799.662	-1	1200.78	0	68	FEMALE	BLACK OR AFRICAN AMERICAN	Infiltrating Ductal Carcinoma	LUMB	Alive	317
TCGA-A7-A6VY	1328.26	-1	1863.02	0	48	FEMALE	BLACK OR AFRICAN AMERICAN	Infiltrating Ductal Carcinoma	TNBC	Alive	266
TCGA-AC-A2BK	1062.04	0	2697.47	1	78	FEMALE	BLACK OR AFRICAN AMERICAN	Infiltrating Ductal Carcinoma	TNBC	Alive	2222
TCGA-AC-A2BM	592.72	-1	1469.38	-1	41	FEMALE	BLACK OR AFRICAN AMERICAN	Infiltrating Ductal Carcinoma	LUMB	Alive	3022
TCGA-AC-A3BB	1092.03	-1	1130.4	-1	46	FEMALE	BLACK OR AFRICAN AMERICAN	Infiltrating Lobular Carcinoma	LUMA	Alive	987
TCGA-AC-A3W5	1287.12	-1	1364.87	1	65	FEMALE	BLACK OR AFRICAN AMERICAN	Infiltrating Lobular Carcinoma	HER2	Alive	504
TCGA-AC-A5EH	1470.52	0	1053.61	-1	76	FEMALE	BLACK OR AFRICAN AMERICAN	Infiltrating Ductal Carcinoma	HER2	Alive	511
TCGA-AC-A5XU	759.72	-1	1365.47	1	74	FEMALE	BLACK OR AFRICAN AMERICAN	Infiltrating Ductal Carcinoma	LUMA	Alive	455
TCGA-AC-A62X	1503.07	-1	2103.05	1	72	FEMALE	BLACK OR AFRICAN AMERICAN	Infiltrating Ductal Carcinoma	TNBC	Alive	417
TCGA-AC-A6IW	1431.94	0	1203.5	1	73	FEMALE	BLACK OR AFRICAN AMERICAN	Infiltrating Ductal Carcinoma	TNBC	Alive	413
TCGA-AC-A6NO	974.298	0	954.528	0	43	FEMALE	BLACK OR AFRICAN AMERICAN	Infiltrating Ductal Carcinoma	LUMA	Alive	51
TCGA-AC-A7VB	364.94	-1	1030.73	0	51	FEMALE	BLACK OR AFRICAN AMERICAN	Infiltrating Ductal Carcinoma	LUMB	Alive	250
TCGA-AC-A8OP	668.831	1	1322.13	-1	72	FEMALE	BLACK OR AFRICAN AMERICAN	Infiltrating Ductal Carcinoma	LUMA	Alive	614
TCGA-AC-A8OQ	1443.58	0	1928.83	1	72	FEMALE	BLACK OR AFRICAN AMERICAN	Infiltrating Ductal Carcinoma	TNBC	Alive	34
TCGA-AO-A03O	853.275	-1	1371.62	0	69	FEMALE	BLACK OR AFRICAN AMERICAN	Infiltrating Ductal Carcinoma	LUMB	Dead	2483
TCGA-AO-A03P	518.24	-1	1192.42	0	54	FEMALE	BLACK OR AFRICAN AMERICAN	Infiltrating Ductal Carcinoma	LUMB	Dead	2911
TCGA-AO-A0J4	776.751	-1	1454.08	1	41	FEMALE	BLACK OR AFRICAN AMERICAN	Infiltrating Ductal Carcinoma	TNBC	Alive	1587
TCGA-AO-A0JA	479.082	-1	1795.23	0	36	FEMALE	BLACK OR AFRICAN AMERICAN	Infiltrating Ductal Carcinoma	LUMA	Alive	655
TCGA-AO-A0JE	846.247	-1	1307.91	0	53	FEMALE	BLACK OR AFRICAN AMERICAN	Infiltrating Ductal Carcinoma	HER2	Alive	2335
TCGA-AO-A125	748.184	0	730.019	0	72	FEMALE	BLACK OR AFRICAN AMERICAN	Other, specify	LUMA	Alive	3456
TCGA-AO-A12H	861.655	0	1143.94	0	69	FEMALE	BLACK OR AFRICAN AMERICAN	Other, specify	LUMA	Alive	1234
TCGA-AQ-A54N	1088.26	-1	460.051	-1	51	FEMALE	BLACK OR AFRICAN AMERICAN	Infiltrating Ductal Carcinoma	TNBC	Alive	78
TCGA-AR-A0TT	655.791	-1	1225.53	0	53	FEMALE	BLACK OR AFRICAN AMERICAN	Infiltrating Ductal Carcinoma	LUMB	Alive	3316
TCGA-B6-A0I1	1371.81	0	725.186	0	73	FEMALE	BLACK OR AFRICAN AMERICAN	Infiltrating Ductal Carcinoma	TNBC	Dead	2361
TCGA-B6-A0IE	537.012	-1	1028.94	0	38	FEMALE	BLACK OR AFRICAN AMERICAN	Mixed Histology (please specify)	LUMA	Dead	1993
TCGA-B6-A0IJ	1131.25	-1	1185.9	0	42	FEMALE	BLACK OR AFRICAN AMERICAN	Infiltrating Ductal Carcinoma	TNBC	Alive	7106
TCGA-B6-A0IM	506.834	0	1265.62	0	75	FEMALE	BLACK OR AFRICAN AMERICAN	Other, specify	LUMA	Dead	3873
TCGA-B6-A0RE	1419.12	-1	1146.33	0	61	FEMALE	BLACK OR AFRICAN AMERICAN	Infiltrating Ductal Carcinoma	TNBC	Alive	7777
TCGA-B6-A0RH	756.534	-1	800.206	0	51	FEMALE	BLACK OR AFRICAN AMERICAN	Infiltrating Ductal Carcinoma	HER2	Dead	6456
TCGA-B6-A0RL	768.615	0	1114.46	0	60	FEMALE	BLACK OR AFRICAN AMERICAN	Infiltrating Ductal Carcinoma	LUMB	Dead	2469
TCGA-B6-A0RM	760.115	0	1004.79	0	57	FEMALE	BLACK OR AFRICAN AMERICAN	Infiltrating Ductal Carcinoma	LUMA	Dead	2373
TCGA-B6-A0WS	1082.91	1	1388.49	0	58	FEMALE	BLACK OR AFRICAN AMERICAN	Infiltrating Ductal Carcinoma	LUMA	Dead	2965
TCGA-B6-A0WW	654.174	0	1965.36	0	58	FEMALE	BLACK OR AFRICAN AMERICAN	Infiltrating Ductal Carcinoma	LUMB	Dead	558
TCGA-B6-A0WX	1978.06	1	1328.44	0	40	FEMALE	BLACK OR AFRICAN AMERICAN	Other, specify	TNBC	Dead	639
TCGA-B6-A0WZ	557.054	-1	1003.35	0	50	FEMALE	BLACK OR AFRICAN AMERICAN	Infiltrating Ductal Carcinoma	LUMA	Alive	6292
TCGA-B6-A0X5	629.119	0	239.308	0	61	FEMALE	BLACK OR AFRICAN AMERICAN	Infiltrating Ductal Carcinoma	LUMB	Dead	2097
TCGA-B6-A3ZX	1821.66	0	1127.11	0	50	FEMALE	BLACK OR AFRICAN AMERICAN	Mixed Histology (please specify)	TNBC	Dead	1152
TCGA-B6-A400	1950.23	0	1399.5	1	43	FEMALE	BLACK OR AFRICAN AMERICAN	Infiltrating Ductal Carcinoma	TNBC	Alive	215
TCGA-B6-A401	1324.32	1	690.044	-1	47	FEMALE	BLACK OR AFRICAN AMERICAN	Infiltrating Ductal Carcinoma	LUMA	Alive	2596
TCGA-B6-A402	728.199	-1	1232.68	1	47	FEMALE	BLACK OR AFRICAN AMERICAN	Infiltrating Ductal Carcinoma	TNBC	Alive	2281
TCGA-B6-A408	1023.85	-1	1152.23	1	55	FEMALE	BLACK OR AFRICAN AMERICAN	Mixed Histology (please specify)	LUMA	Alive	2072
TCGA-B6-A409	2159.3	-1	1548.17	1	44	FEMALE	BLACK OR AFRICAN AMERICAN	Infiltrating Ductal Carcinoma	TNBC	Dead	573
TCGA-BH-A0AV	854.936	-1	2633.98	1	52	FEMALE	BLACK OR AFRICAN AMERICAN	Infiltrating Ductal Carcinoma	TNBC	Alive	1820
TCGA-BH-A0B0	755.886	-1	1047.5	-1	56	FEMALE	BLACK OR AFRICAN AMERICAN	Infiltrating Ductal Carcinoma	LUMA	Alive	2477
TCGA-BH-A0BW	815.77	-1	2295.14	0	71	FEMALE	BLACK OR AFRICAN AMERICAN	Infiltrating Ductal Carcinoma	TNBC	Alive	2371
TCGA-BH-A0DG	895.928	0	1106.88	0	30	FEMALE	BLACK OR AFRICAN AMERICAN	Infiltrating Ductal Carcinoma	LUMA	Alive	2041
TCGA-BH-A0E2	690.345	-1	1238.62	-1	49	FEMALE	BLACK OR AFRICAN AMERICAN	Infiltrating Ductal Carcinoma	LUMA	Alive	435
TCGA-BH-A1FC	950.349	1	2094.59	1	78	FEMALE	BLACK OR AFRICAN AMERICAN	Medullary Carcinoma	TNBC	Dead	3472
TCGA-BH-A209	809.115	-1	1361.35	-1	77	FEMALE	BLACK OR AFRICAN AMERICAN	Medullary Carcinoma	LUMB	Dead	3959
TCGA-BH-A42T	737.152	-1	1001.67	0	75	FEMALE	BLACK OR AFRICAN AMERICAN	Infiltrating Lobular Carcinoma	LUMB	Dead	320
TCGA-BH-A42U	1883.68	0	1013.38	0	80	FEMALE	BLACK OR AFRICAN AMERICAN	Infiltrating Lobular Carcinoma	NORMAL	Alive	3364
TCGA-BH-A42V	992.577	0	1274.34	1	41	FEMALE	BLACK OR AFRICAN AMERICAN	Infiltrating Ductal Carcinoma	LUMA	Alive	635
TCGA-BH-A5IZ	2164.45	-1	1756.04	2	51	FEMALE	BLACK OR AFRICAN AMERICAN	Infiltrating Ductal Carcinoma	TNBC	Alive	567
TCGA-BH-A5J0	1088.04	-1	1073.68	-1	63	FEMALE	BLACK OR AFRICAN AMERICAN	Infiltrating Ductal Carcinoma	LUMA	Alive	715
TCGA-BH-A6R8	858.991	0	997.326	0	46	FEMALE	BLACK OR AFRICAN AMERICAN	Infiltrating Ductal Carcinoma	LUMA	Alive	293
TCGA-E2-A14X	772.14	-1	2261.75	1	55	FEMALE	BLACK OR AFRICAN AMERICAN	Infiltrating Ductal Carcinoma	TNBC	Alive	972
TCGA-E2-A15L	718.08	0	1253.37	0	65	FEMALE	BLACK OR AFRICAN AMERICAN	Infiltrating Lobular Carcinoma	LUMA	Alive	626
TCGA-E2-A15O	737.2	0	1387.04	0	89	FEMALE	BLACK OR AFRICAN AMERICAN	Infiltrating Ductal Carcinoma	LUMA	Alive	1545
TCGA-E2-A1L8	697.052	-1	1047.78	-1	52	FEMALE	BLACK OR AFRICAN AMERICAN	Infiltrating Lobular Carcinoma	LUMA	Alive	2240
TCGA-E2-A1LB	1258.9	0	1345.61	0	41	FEMALE	BLACK OR AFRICAN AMERICAN	Infiltrating Ductal Carcinoma	HER2	Alive	2306
TCGA-E2-A1LG	1049.45	-1	1335.69	1	50	FEMALE	BLACK OR AFRICAN AMERICAN	Infiltrating Lobular Carcinoma	TNBC	Alive	1523
TCGA-E2-A1LK	1636.9	1	1092.83	0	84	FEMALE	BLACK OR AFRICAN AMERICAN	Infiltrating Ductal Carcinoma	TNBC	Dead	266
TCGA-E2-A1LL	2544.41	-1	1193.03	-1	73	FEMALE	BLACK OR AFRICAN AMERICAN	Infiltrating Ductal Carcinoma	TNBC	Alive	1309
TCGA-E2-A2P5	1220.12	-1	1139.57	1	78	FEMALE	BLACK OR AFRICAN AMERICAN	Infiltrating Lobular Carcinoma	LUMA	Dead	821
TCGA-E2-A56Z	730.839	-1	963.03	1	69	FEMALE	BLACK OR AFRICAN AMERICAN	Infiltrating Ductal Carcinoma	LUMB	Alive	252
TCGA-E2-A570	1069.02	0	1097.91	0	47	FEMALE	BLACK OR AFRICAN AMERICAN	Infiltrating Ductal Carcinoma	LUMA	Alive	931
TCGA-E2-A573	1395.16	-1	1586.19	1	48	FEMALE	BLACK OR AFRICAN AMERICAN	Infiltrating Ductal Carcinoma	TNBC	Alive	1062
TCGA-E2-A574	1607.18	1	1416.39	1	44	FEMALE	BLACK OR AFRICAN AMERICAN	Infiltrating Ductal Carcinoma	TNBC	Alive	1179
TCGA-E2-A576	1009.62	0	698.442	0	69	FEMALE	BLACK OR AFRICAN AMERICAN	Infiltrating Lobular Carcinoma	LUMA	Alive	1043
TCGA-E2-A9RU	1531.93	0	999.495	0	90	FEMALE	BLACK OR AFRICAN AMERICAN	Infiltrating Ductal Carcinoma	LUMB	Alive	538
TCGA-EW-A1J2	651.56	-1	1566.76	0	50	FEMALE	BLACK OR AFRICAN AMERICAN	Infiltrating Lobular Carcinoma	LUMA	Alive	403
TCGA-EW-A1OW	1442.59	0	1842.35	1	58	FEMALE	BLACK OR AFRICAN AMERICAN	Infiltrating Ductal Carcinoma	TNBC	Alive	694
TCGA-EW-A1OZ	1237.35	1	1240.11	0	56	FEMALE	BLACK OR AFRICAN AMERICAN	Infiltrating Ductal Carcinoma	LUMB	Alive	1229
TCGA-EW-A1PB	1885.01	1	973.324	0	70	FEMALE	BLACK OR AFRICAN AMERICAN	Infiltrating Ductal Carcinoma	TNBC	Alive	608
TCGA-EW-A1PC	1168.63	1	947.554	0	66	FEMALE	BLACK OR AFRICAN AMERICAN	Infiltrating Ductal Carcinoma	LUMB	Alive	187
TCGA-EW-A2FR	1129.87	-1	1326.33	0	59	FEMALE	BLACK OR AFRICAN AMERICAN	Infiltrating Ductal Carcinoma	HER2	Alive	1673
TCGA-EW-A2FS	809.789	1	925.102	0	41	FEMALE	BLACK OR AFRICAN AMERICAN	Infiltrating Ductal Carcinoma	LUMA	Alive	1604
TCGA-EW-A3U0	1231.21	0	1150.04	0	61	FEMALE	BLACK OR AFRICAN AMERICAN	Infiltrating Ductal Carcinoma	TNBC	Alive	532
TCGA-EW-A6S9	682.6	-1	1576.67	2	34	FEMALE	BLACK OR AFRICAN AMERICAN	Infiltrating Ductal Carcinoma	LUMA	Alive	463
TCGA-EW-A6SB	969.925	-1	1423.56	1	62	FEMALE	BLACK OR AFRICAN AMERICAN	Infiltrating Ductal Carcinoma	TNBC	Alive	760
TCGA-EW-A6SC	732.158	0	1163.31	0	60	FEMALE	BLACK OR AFRICAN AMERICAN	Infiltrating Lobular Carcinoma	LUMA	Alive	952
TCGA-EW-A6SD	791.453	-1	2448.52	1	32	FEMALE	BLACK OR AFRICAN AMERICAN	Infiltrating Ductal Carcinoma	HER2	Alive	1010
TCGA-GI-A2C9	911.337	-1	1419.94	1	58	FEMALE	BLACK OR AFRICAN AMERICAN	Infiltrating Ductal Carcinoma	TNBC	Alive	3342
TCGA-GM-A2DF	1217.37	-1	1055.72	1	53	FEMALE	BLACK OR AFRICAN AMERICAN	Infiltrating Ductal Carcinoma	TNBC	Alive	2155
TCGA-GM-A2DO	731.299	0	978.346	0	54	FEMALE	BLACK OR AFRICAN AMERICAN	Infiltrating Lobular Carcinoma	LUMB	Alive	2596
TCGA-GM-A3XL	1141.92	-1	980.27	-1	49	FEMALE	BLACK OR AFRICAN AMERICAN	Infiltrating Ductal Carcinoma	TNBC	Alive	2108
TCGA-LD-A7W5	915.357	-1	1168.96	1	52	FEMALE	BLACK OR AFRICAN AMERICAN	Infiltrating Ductal Carcinoma	LUMA	Alive	216
TCGA-LD-A9QF	1483.11	-1	1364.17	0	73	FEMALE	BLACK OR AFRICAN AMERICAN	Infiltrating Ductal Carcinoma	NORMAL	Alive	323
TCGA-LL-A441	1189.01	-1	1684.96	1	62	FEMALE	BLACK OR AFRICAN AMERICAN	Infiltrating Ductal Carcinoma	NORMAL	Alive	996
TCGA-LL-A442	931.688	0	928.052	0	56	FEMALE	BLACK OR AFRICAN AMERICAN	Infiltrating Ductal Carcinoma	LUMA	Alive	889
TCGA-LL-A5YM	811.107	-1	929.308	1	88	FEMALE	BLACK OR AFRICAN AMERICAN	Infiltrating Ductal Carcinoma	LUMB	Alive	466
TCGA-LL-A5YN	1061.65	-1	1056.95	1	46	FEMALE	BLACK OR AFRICAN AMERICAN	Infiltrating Ductal Carcinoma	LUMA	Alive	447
TCGA-LL-A5YO	1403.83	-1	1594.93	0	50	FEMALE	BLACK OR AFRICAN AMERICAN	Infiltrating Ductal Carcinoma	HER2	Alive	440
TCGA-LL-A5YP	1672.24	-1	1096.74	0	49	FEMALE	BLACK OR AFRICAN AMERICAN	Infiltrating Ductal Carcinoma	TNBC	Alive	450
TCGA-LL-A6FQ	1156.85	0	512.482	0	77	FEMALE	BLACK OR AFRICAN AMERICAN	Infiltrating Ductal Carcinoma	LUMA	Alive	80
TCGA-LL-A6FR	654.523	-1	978.982	1	50	FEMALE	BLACK OR AFRICAN AMERICAN	Infiltrating Ductal Carcinoma	TNBC	Alive	489
TCGA-LL-A73Y	588.567	0	1499.95	1	67	FEMALE	BLACK OR AFRICAN AMERICAN	Infiltrating Ductal Carcinoma	TNBC	Alive	477
TCGA-LL-A73Z	974.747	-1	1179.52	0	55	FEMALE	BLACK OR AFRICAN AMERICAN	Infiltrating Ductal Carcinoma	NORMAL	Dead	227
TCGA-LL-A740	1006.06	0	1476.38	0	61	FEMALE	BLACK OR AFRICAN AMERICAN	Infiltrating Ductal Carcinoma	LUMA	Alive	441
TCGA-LL-A7SZ	1597.21	1	737.282	-1	49	FEMALE	BLACK OR AFRICAN AMERICAN	Infiltrating Ductal Carcinoma	LUMA	Alive	594
TCGA-LL-A7T0	1582.86	1	1285.31	0	70	FEMALE	BLACK OR AFRICAN AMERICAN	Infiltrating Ductal Carcinoma	LUMB	Alive	376
TCGA-LL-A8F5	2637.99	-1	1477.96	1	61	FEMALE	BLACK OR AFRICAN AMERICAN	Infiltrating Ductal Carcinoma	TNBC	Alive	596
TCGA-OL-A5D6	1069.71	-1	918.503	-1	71	FEMALE	BLACK OR AFRICAN AMERICAN	Infiltrating Ductal Carcinoma	NORMAL	Dead	1104
TCGA-OL-A5D7	1760.84	-1	878.748	0	70	FEMALE	BLACK OR AFRICAN AMERICAN	Infiltrating Ductal Carcinoma	TNBC	Alive	1780
TCGA-OL-A5D8	414.392	-1	1029.78	0	40	FEMALE	BLACK OR AFRICAN AMERICAN	Infiltrating Ductal Carcinoma	LUMA	Alive	973
TCGA-OL-A5RU	1163.71	0	1098.92	0	63	FEMALE	BLACK OR AFRICAN AMERICAN	Infiltrating Ductal Carcinoma	LUMA	Alive	1219
TCGA-OL-A5RV	1102.65	0	1175.24	0	43	FEMALE	BLACK OR AFRICAN AMERICAN	Infiltrating Ductal Carcinoma	LUMA	Alive	1062
TCGA-OL-A5RW	1090.91	-1	1286.79	1	40	FEMALE	BLACK OR AFRICAN AMERICAN	Infiltrating Ductal Carcinoma	TNBC	Alive	1106
TCGA-OL-A5RX	1592.71	0	1016.25	0	51	FEMALE	BLACK OR AFRICAN AMERICAN	Infiltrating Ductal Carcinoma	LUMA	Alive	878
TCGA-OL-A5RY	1367.48	-1	1480.63	0	52	FEMALE	BLACK OR AFRICAN AMERICAN	Infiltrating Ductal Carcinoma	NORMAL	Alive	752
TCGA-OL-A5RZ	5806.14	1	908.44	0	57	FEMALE	BLACK OR AFRICAN AMERICAN	Infiltrating Ductal Carcinoma	HER2	Alive	679
TCGA-OL-A5S0	1128.37	-1	1762.01	1	66	FEMALE	BLACK OR AFRICAN AMERICAN	Infiltrating Ductal Carcinoma	TNBC	Alive	620
TCGA-OL-A66H	1388.66	0	1025.85	0	nan	FEMALE	BLACK OR AFRICAN AMERICAN	Mucinous Carcinoma	LUMA	Alive	nan
TCGA-OL-A66I	1069.17	-1	1959.31	1	36	FEMALE	BLACK OR AFRICAN AMERICAN	Infiltrating Ductal Carcinoma	TNBC	Alive	714
TCGA-OL-A66L	1430.37	0	681.467	0	71	FEMALE	BLACK OR AFRICAN AMERICAN	Infiltrating Ductal Carcinoma	LUMA	Alive	1301
TCGA-OL-A66O	960.16	-1	758.689	0	39	FEMALE	BLACK OR AFRICAN AMERICAN	Infiltrating Ductal Carcinoma	LUMA	Alive	528
TCGA-OL-A66P	2164.03	0	953.237	0	75	FEMALE	BLACK OR AFRICAN AMERICAN	Infiltrating Ductal Carcinoma	HER2	Alive	428
TCGA-OL-A6VO	917.73	1	1204.16	1	43	FEMALE	BLACK OR AFRICAN AMERICAN	Infiltrating Ductal Carcinoma	TNBC	Alive	858
TCGA-OL-A6VR	946.76	0	1165.5	0	48	FEMALE	BLACK OR AFRICAN AMERICAN	Infiltrating Ductal Carcinoma	LUMA	Alive	1220
TCGA-OL-A97C	836.597	0	1166.78	0	67	FEMALE	BLACK OR AFRICAN AMERICAN	Other, specify	NORMAL	Alive	271
TCGA-PL-A8LV	697.76	-1	1171.47	-1	54	FEMALE	BLACK OR AFRICAN AMERICAN	Medullary Carcinoma	TNBC	Alive	0
TCGA-PL-A8LX	1269.39	0	1114.5	0	35	FEMALE	BLACK OR AFRICAN AMERICAN	Infiltrating Ductal Carcinoma	LUMA	Alive	5
TCGA-PL-A8LY	1802.41	0	1120.96	0	30	FEMALE	BLACK OR AFRICAN AMERICAN	Infiltrating Ductal Carcinoma	NORMAL	Alive	8
TCGA-PL-A8LZ	1365.22	0	1260.17	1	29	FEMALE	BLACK OR AFRICAN AMERICAN	Infiltrating Ductal Carcinoma	TNBC	Alive	302
TCGA-S3-A6ZF	1017.41	0	1450.72	1	64	FEMALE	BLACK OR AFRICAN AMERICAN	Infiltrating Ductal Carcinoma	LUMB	Alive	572
TCGA-S3-A6ZG	686.057	1	988.234	-1	71	FEMALE	BLACK OR AFRICAN AMERICAN	Mixed Histology (please specify)	LUMA	Alive	562
TCGA-S3-A6ZH	747.658	1	1693.1	0	29	FEMALE	BLACK OR AFRICAN AMERICAN	Infiltrating Ductal Carcinoma	LUMA	Alive	641
TCGA-S3-AA0Z	1597.81	0	1514.22	1	63	FEMALE	BLACK OR AFRICAN AMERICAN	Infiltrating Ductal Carcinoma	TNBC	Alive	629
TCGA-S3-AA10	978.732	-1	1474.69	1	65	FEMALE	BLACK OR AFRICAN AMERICAN	Infiltrating Ductal Carcinoma	TNBC	Alive	586
TCGA-S3-AA11	813.416	0	1155.93	0	67	FEMALE	BLACK OR AFRICAN AMERICAN	Infiltrating Ductal Carcinoma	LUMA	Alive	421
TCGA-S3-AA12	447.332	0	1103.88	0	82	FEMALE	BLACK OR AFRICAN AMERICAN	Infiltrating Ductal Carcinoma	LUMA	Alive	574
TCGA-S3-AA14	986.712	0	1467.95	0	47	FEMALE	BLACK OR AFRICAN AMERICAN	Infiltrating Ductal Carcinoma	LUMA	Alive	529
TCGA-S3-AA15	1722.96	0	1517.62	0	51	FEMALE	BLACK OR AFRICAN AMERICAN	Infiltrating Ductal Carcinoma	TNBC	Alive	525
TCGA-S3-AA17	710.398	-1	1125.88	0	64	FEMALE	BLACK OR AFRICAN AMERICAN	Infiltrating Ductal Carcinoma	LUMB	Alive	424
TCGA-UL-AAZ6	1186.49	0	1052.75	0	73	FEMALE	BLACK OR AFRICAN AMERICAN	Infiltrating Ductal Carcinoma	LUMA	Alive	518
TCGA-UU-A93S	1620.12	0	1018.81	0	63	FEMALE	BLACK OR AFRICAN AMERICAN	Infiltrating Ductal Carcinoma	HER2	Dead	116
TCGA-V7-A7HQ	1932.5	0	821.527	0	75	FEMALE	BLACK OR AFRICAN AMERICAN	Infiltrating Ductal Carcinoma	LUMA	Alive	2033
TCGA-WT-AB41	945.584	-1	726.341	0	55	FEMALE	BLACK OR AFRICAN AMERICAN	Infiltrating Ductal Carcinoma	LUMA	Alive	1611
TCGA-3C-AAAU	630.726	-1	1416.55	1	55	FEMALE	WHITE	Infiltrating Lobular Carcinoma	LUMA	Alive	4047
TCGA-4H-AAAK	1100.43	1	1229.79	0	50	FEMALE	WHITE	Infiltrating Lobular Carcinoma	LUMA	Alive	348
TCGA-5L-AAT0	507.992	-1	1292.27	0	42	FEMALE	WHITE	Infiltrating Lobular Carcinoma	LUMA	Alive	1477
TCGA-A1-A0SB	910.913	0	1163.64	0	70	FEMALE	WHITE	Other, specify	NORMAL	Alive	259
TCGA-A1-A0SD	564.387	-1	1670.66	0	59	FEMALE	WHITE	Infiltrating Ductal Carcinoma	LUMA	Alive	437
TCGA-A1-A0SE	591.362	0	1482.19	0	56	FEMALE	WHITE	Mixed Histology (please specify)	LUMA	Alive	1321
TCGA-A1-A0SF	540.217	-1	999.894	0	54	FEMALE	WHITE	Infiltrating Ductal Carcinoma	LUMA	Alive	1463
TCGA-A1-A0SG	900.009	0	1370.53	0	61	FEMALE	WHITE	Other, specify	LUMA	Alive	434
TCGA-A1-A0SH	728.806	0	1554.04	0	39	FEMALE	WHITE	Infiltrating Ductal Carcinoma	LUMA	Alive	1437
TCGA-A1-A0SI	564.45	-1	1554.74	0	52	FEMALE	WHITE	Infiltrating Ductal Carcinoma	LUMB	Alive	635
TCGA-A1-A0SN	1297.31	1	1449.97	0	50	FEMALE	WHITE	Infiltrating Ductal Carcinoma	LUMB	Alive	1196
TCGA-A1-A0SO	741.579	-1	1995.75	1	67	FEMALE	WHITE	Infiltrating Ductal Carcinoma	TNBC	Alive	852
TCGA-A1-A0SQ	513.565	-1	1500.76	0	45	FEMALE	WHITE	Infiltrating Ductal Carcinoma	LUMA	Alive	554
TCGA-A2-A04N	794.374	0	1232.57	0	66	FEMALE	WHITE	Infiltrating Ductal Carcinoma	LUMA	Alive	4354
TCGA-A2-A04Q	1450.44	0	1392.21	0	48	FEMALE	WHITE	Infiltrating Ductal Carcinoma	TNBC	Alive	2385
TCGA-A2-A04T	1289.75	-1	1669.13	1	62	FEMALE	WHITE	Infiltrating Ductal Carcinoma	TNBC	Alive	2246
TCGA-A2-A04U	1166.39	-1	1039.62	-1	47	FEMALE	WHITE	Infiltrating Ductal Carcinoma	TNBC	Alive	2654
TCGA-A2-A04V	422.082	-1	910.165	0	39	FEMALE	WHITE	Infiltrating Ductal Carcinoma	LUMA	Dead	1920
TCGA-A2-A04W	2078.08	-1	862.893	-1	50	FEMALE	WHITE	Other, specify	HER2	Alive	3102
TCGA-A2-A04X	1375.15	0	1685.5	1	34	FEMALE	WHITE	Infiltrating Ductal Carcinoma	HER2	Alive	1686
TCGA-A2-A04Y	722.984	-1	1012.38	0	53	FEMALE	WHITE	Infiltrating Ductal Carcinoma	LUMB	Alive	1099
TCGA-A2-A0CK	724.444	-1	1040.81	0	60	FEMALE	WHITE	Infiltrating Lobular Carcinoma	LUMA	Alive	4159
TCGA-A2-A0CO	1257.86	-1	987.99	0	85	FEMALE	WHITE	Infiltrating Lobular Carcinoma	LUMA	Dead	3492
TCGA-A2-A0CP	1036.19	0	1089.14	0	60	FEMALE	WHITE	Infiltrating Ductal Carcinoma	LUMA	Alive	2813
TCGA-A2-A0CS	1262.58	0	1077.07	-1	73	FEMALE	WHITE	Infiltrating Ductal Carcinoma	LUMA	Dead	2348
TCGA-A2-A0CT	319.816	-1	2765.89	1	71	FEMALE	WHITE	Infiltrating Ductal Carcinoma	LUMA	Alive	2289
TCGA-A2-A0CU	605.957	-2	1228.71	-1	73	FEMALE	WHITE	Infiltrating Ductal Carcinoma	LUMA	Dead	158
TCGA-A2-A0CW	717.919	-1	1456.24	0	67	FEMALE	WHITE	Infiltrating Ductal Carcinoma	LUMB	Alive	3283
TCGA-A2-A0CX	847.139	-1	1321.36	0	52	FEMALE	WHITE	Infiltrating Ductal Carcinoma	HER2	Alive	1728
TCGA-A2-A0D1	1076.4	-1	1002.94	0	76	FEMALE	WHITE	Infiltrating Ductal Carcinoma	HER2	Alive	1051
TCGA-A2-A0D2	1758.64	0	1798.56	1	45	FEMALE	WHITE	Infiltrating Ductal Carcinoma	TNBC	Alive	1027
TCGA-A2-A0D3	810.898	0	1242.95	0	42	FEMALE	WHITE	Infiltrating Ductal Carcinoma	LUMA	Alive	1873
TCGA-A2-A0EM	781.605	0	1274.86	0	73	FEMALE	WHITE	Infiltrating Ductal Carcinoma	LUMA	Alive	3094
TCGA-A2-A0EN	1232.47	0	1254.92	0	70	FEMALE	WHITE	Infiltrating Lobular Carcinoma	LUMA	Alive	4088
TCGA-A2-A0EO	644.189	-1	1087.16	-1	54	FEMALE	WHITE	Infiltrating Ductal Carcinoma	LUMA	Alive	2442
TCGA-A2-A0EP	1477.41	0	1406.31	0	56	FEMALE	WHITE	Infiltrating Lobular Carcinoma	LUMA	Alive	3603
TCGA-A2-A0ER	745.256	0	1497.14	0	63	FEMALE	WHITE	Infiltrating Ductal Carcinoma	LUMA	Alive	2263
TCGA-A2-A0ES	774.961	0	1329.62	0	52	FEMALE	WHITE	Infiltrating Lobular Carcinoma	LUMA	Alive	2190
TCGA-A2-A0ET	663.868	1	1373.24	1	58	FEMALE	WHITE	Infiltrating Ductal Carcinoma	LUMA	Alive	1066
TCGA-A2-A0EU	869.362	1	1470.13	0	79	FEMALE	WHITE	Infiltrating Ductal Carcinoma	LUMA	Alive	1043
TCGA-A2-A0EV	1125.26	1	1775.79	1	80	FEMALE	WHITE	Infiltrating Ductal Carcinoma	LUMA	Alive	968
TCGA-A2-A0EW	732.554	0	1386.82	0	53	FEMALE	WHITE	Infiltrating Lobular Carcinoma	LUMA	Dead	1884
TCGA-A2-A0EX	834.063	0	1288.53	0	46	FEMALE	WHITE	Infiltrating Lobular Carcinoma	LUMA	Alive	752
TCGA-A2-A0EY	3551.04	2	1773.14	1	62	FEMALE	WHITE	Infiltrating Ductal Carcinoma	LUMB	Alive	1925
TCGA-A2-A0ST	988.985	0	1705.49	0	62	FEMALE	WHITE	Infiltrating Ductal Carcinoma	TNBC	Alive	3017
TCGA-A2-A0SU	663.366	0	1175.2	0	66	FEMALE	WHITE	Infiltrating Ductal Carcinoma	LUMA	Alive	1662
TCGA-A2-A0SV	1017.21	-1	1304.15	-1	63	FEMALE	WHITE	Infiltrating Ductal Carcinoma	LUMB	Dead	825
TCGA-A2-A0SW	582.191	-1	1039.34	0	82	FEMALE	WHITE	Infiltrating Ductal Carcinoma	LUMB	Dead	1365
TCGA-A2-A0SX	1025.05	-1	1513.49	0	48	FEMALE	WHITE	Infiltrating Ductal Carcinoma	TNBC	Alive	1534
TCGA-A2-A0SY	1032.75	1	1406.27	0	62	FEMALE	WHITE	Infiltrating Lobular Carcinoma	LUMA	Alive	1347
TCGA-A2-A0T0	1303.05	0	1559.27	1	59	FEMALE	WHITE	Infiltrating Ductal Carcinoma	TNBC	Alive	533
TCGA-A2-A0T2	1131.52	0	1290.24	1	66	FEMALE	WHITE	Infiltrating Ductal Carcinoma	TNBC	Dead	255
TCGA-A2-A0T3	699.43	1	1159.47	-1	37	FEMALE	WHITE	Infiltrating Ductal Carcinoma	LUMB	Alive	1516
TCGA-A2-A0T4	782.333	0	1116.64	-1	62	FEMALE	WHITE	Infiltrating Lobular Carcinoma	LUMA	Alive	624
TCGA-A2-A0T5	984.043	0	1150	0	39	FEMALE	WHITE	Infiltrating Ductal Carcinoma	LUMA	Alive	531
TCGA-A2-A0T6	663.241	0	1561.06	0	50	FEMALE	WHITE	Infiltrating Lobular Carcinoma	LUMA	Alive	575
TCGA-A2-A0T7	1439.45	1	1652.92	1	51	FEMALE	WHITE	Infiltrating Ductal Carcinoma	LUMA	Alive	631
TCGA-A2-A0YC	789.863	1	1384.4	0	59	FEMALE	WHITE	Infiltrating Ductal Carcinoma	LUMA	Alive	990
TCGA-A2-A0YD	923.424	0	1487.4	0	63	FEMALE	WHITE	Infiltrating Lobular Carcinoma	LUMA	Alive	769
TCGA-A2-A0YE	2443.92	1	1935.68	1	48	FEMALE	WHITE	Infiltrating Ductal Carcinoma	TNBC	Alive	554
TCGA-A2-A0YG	1332.9	1	2082.36	1	63	FEMALE	WHITE	Infiltrating Ductal Carcinoma	LUMB	Alive	666
TCGA-A2-A0YH	588.204	-1	1499.96	0	53	FEMALE	WHITE	Infiltrating Ductal Carcinoma	LUMB	Alive	659
TCGA-A2-A0YI	980.024	0	1563.8	0	62	FEMALE	WHITE	Infiltrating Ductal Carcinoma	LUMA	Alive	1505
TCGA-A2-A0YJ	1390.56	1	2376.73	1	39	FEMALE	WHITE	Infiltrating Ductal Carcinoma	TNBC	Alive	566
TCGA-A2-A0YK	807.674	-1	1499.04	0	61	FEMALE	WHITE	Infiltrating Lobular Carcinoma	NORMAL	Alive	588
TCGA-A2-A0YL	468.327	-1	1495.96	0	48	FEMALE	WHITE	Infiltrating Lobular Carcinoma	LUMA	Alive	1474
TCGA-A2-A0YM	1329.07	1	1999.05	1	67	FEMALE	WHITE	Infiltrating Ductal Carcinoma	TNBC	Alive	965
TCGA-A2-A0YT	871.148	-1	2406.85	1	56	FEMALE	WHITE	Infiltrating Ductal Carcinoma	LUMB	Dead	723
TCGA-A2-A1FV	401.735	0	1597.2	0	74	FEMALE	WHITE	Infiltrating Lobular Carcinoma	LUMA	Alive	714
TCGA-A2-A1FW	339.737	-1	1881.46	1	62	FEMALE	WHITE	Infiltrating Ductal Carcinoma	LUMB	Alive	528
TCGA-A2-A1FX	674.836	1	2249.27	1	61	FEMALE	WHITE	Infiltrating Ductal Carcinoma	LUMB	Alive	1847
TCGA-A2-A1FZ	647.083	0	1501.03	0	63	FEMALE	WHITE	Infiltrating Ductal Carcinoma	LUMA	Alive	683
TCGA-A2-A1G0	460.224	-1	1513.15	0	49	FEMALE	WHITE	Other, specify	LUMA	Alive	616
TCGA-A2-A1G1	1715.07	-1	2216.75	0	85	FEMALE	WHITE	Infiltrating Ductal Carcinoma	TNBC	Alive	584
TCGA-A2-A1G4	683.248	0	1597.81	0	71	FEMALE	WHITE	Infiltrating Ductal Carcinoma	LUMB	Alive	595
TCGA-A2-A1G6	955.303	0	1792.86	0	50	FEMALE	WHITE	Infiltrating Ductal Carcinoma	NORMAL	Alive	501
TCGA-A2-A25A	778.759	-1	1561.37	0	44	FEMALE	WHITE	Infiltrating Lobular Carcinoma	NORMAL	Alive	3276
TCGA-A2-A25C	700.265	0	2676.44	1	50	FEMALE	WHITE	Infiltrating Ductal Carcinoma	LUMB	Alive	523
TCGA-A2-A25D	941.736	-1	1303.12	0	90	FEMALE	WHITE	Infiltrating Lobular Carcinoma	LUMA	Alive	552
TCGA-A2-A25F	976.564	0	2235.13	0	66	FEMALE	WHITE	Infiltrating Ductal Carcinoma	TNBC	Alive	322
TCGA-A2-A3KD	950.207	0	1325.25	0	47	FEMALE	WHITE	Mucinous Carcinoma	LUMA	Alive	1206
TCGA-A2-A4RW	820.218	0	1359.56	0	49	FEMALE	WHITE	Infiltrating Lobular Carcinoma	LUMA	Alive	222
TCGA-A2-A4RY	1097.44	0	1220.96	-1	46	FEMALE	WHITE	Infiltrating Lobular Carcinoma	NORMAL	Alive	648
TCGA-A2-A4S0	657.884	0	924.481	0	77	FEMALE	WHITE	Mucinous Carcinoma	LUMA	Alive	706
TCGA-A2-A4S1	1373.27	-1	1655.75	1	66	FEMALE	WHITE	Metaplastic Carcinoma	TNBC	Alive	820
TCGA-A2-A4S2	836.637	0	766.712	-1	62	FEMALE	WHITE	Infiltrating Lobular Carcinoma	LUMA	Alive	643
TCGA-A7-A0CD	872.309	1	2511.63	1	66	FEMALE	WHITE	Infiltrating Ductal Carcinoma	LUMA	Alive	1165
TCGA-A7-A0CE	1844.56	0	1243.83	0	57	FEMALE	WHITE	Infiltrating Ductal Carcinoma	TNBC	Alive	1074
TCGA-A7-A0CG	669.937	-1	1824.57	0	78	FEMALE	WHITE	Mixed Histology (please specify)	LUMA	Alive	1043
TCGA-A7-A0CH	693.009	0	1271.32	0	79	FEMALE	WHITE	Infiltrating Ductal Carcinoma	LUMA	Alive	1079
TCGA-A7-A0CJ	648.363	-1	1659.78	1	57	FEMALE	WHITE	Infiltrating Ductal Carcinoma	LUMB	Alive	931
TCGA-A7-A0D9	574.31	-1	1428.57	0	37	FEMALE	WHITE	Infiltrating Ductal Carcinoma	LUMA	Alive	1139
TCGA-A7-A0DA	784.471	-1	2222.56	1	62	FEMALE	WHITE	Infiltrating Ductal Carcinoma	TNBC	Alive	1085
TCGA-A7-A0DB	752.946	0	1286.33	0	56	FEMALE	WHITE	Infiltrating Ductal Carcinoma	LUMA	Alive	1007
TCGA-A7-A0DC	589.501	1	1426.59	1	63	FEMALE	WHITE	Infiltrating Ductal Carcinoma	LUMA	Alive	906
TCGA-A7-A13E	1717.95	0	1108.57	0	62	FEMALE	WHITE	Infiltrating Ductal Carcinoma	TNBC	Dead	614
TCGA-A7-A13F	1074.7	1	1594.78	1	44	FEMALE	WHITE	Infiltrating Ductal Carcinoma	LUMB	Alive	765
TCGA-A7-A13G	675.59	0	1260.51	0	79	FEMALE	WHITE	Infiltrating Ductal Carcinoma	LUMA	Alive	718
TCGA-A7-A13H	1257.98	1	1278.46	0	61	FEMALE	WHITE	Infiltrating Lobular Carcinoma	LUMA	Alive	899
TCGA-A7-A26E	500.398	-1	1718.87	0	71	FEMALE	WHITE	Infiltrating Lobular Carcinoma	LUMA	Alive	954
TCGA-A7-A26F	848.658	-1	1926.54	0	55	FEMALE	WHITE	Other, specify	TNBC	Alive	738
TCGA-A7-A26H	327.937	-1	1377.28	0	72	FEMALE	WHITE	Infiltrating Ductal Carcinoma	LUMA	Alive	724
TCGA-A7-A26I	598.617	-1	2916.18	1	65	FEMALE	WHITE	Infiltrating Ductal Carcinoma	TNBC	Alive	661
TCGA-A7-A26J	786.996	1	1952.29	1	49	FEMALE	WHITE	Infiltrating Ductal Carcinoma	LUMA	Alive	627
TCGA-A7-A3IY	927.74	0	1076.89	0	71	FEMALE	WHITE	Mucinous Carcinoma	LUMA	Alive	345
TCGA-A7-A3IZ	525.55	0	1198.31	0	62	FEMALE	WHITE	Infiltrating Lobular Carcinoma	LUMA	Alive	322
TCGA-A7-A3J0	981.41	1	970.824	0	62	FEMALE	WHITE	Mucinous Carcinoma	LUMA	Alive	313
TCGA-A7-A3J1	965.939	0	985.652	-1	63	FEMALE	WHITE	Infiltrating Lobular Carcinoma	LUMA	Alive	343
TCGA-A7-A3RF	1286.16	0	876.945	0	79	FEMALE	WHITE	Mucinous Carcinoma	LUMA	Alive	408
TCGA-A7-A425	953.714	0	1026.55	1	70	FEMALE	WHITE	Infiltrating Lobular Carcinoma	LUMA	Alive	447
TCGA-A7-A426	1077.93	0	1221.3	0	50	FEMALE	WHITE	Infiltrating Lobular Carcinoma	LUMA	Alive	364
TCGA-A7-A4SA	1117.09	1	1016.69	-1	40	FEMALE	WHITE	Infiltrating Lobular Carcinoma	LUMA	Alive	454
TCGA-A7-A4SB	904.141	-1	1076.25	0	56	FEMALE	WHITE	Infiltrating Lobular Carcinoma	LUMA	Alive	418
TCGA-A7-A5ZX	518.466	-1	1214.12	0	48	FEMALE	WHITE	Infiltrating Lobular Carcinoma	LUMA	Alive	336
TCGA-AC-A23C	804.332	0	1426.38	0	62	FEMALE	WHITE	Infiltrating Ductal Carcinoma	LUMA	Alive	585
TCGA-AC-A23E	453.378	-1	1753.9	1	50	FEMALE	WHITE	Infiltrating Ductal Carcinoma	LUMA	Alive	698
TCGA-AC-A23G	1125.73	1	1255.09	0	76	FEMALE	WHITE	Infiltrating Lobular Carcinoma	LUMA	Alive	2248
TCGA-AC-A23H	1034.89	0	1582.38	0	90	FEMALE	WHITE	Infiltrating Ductal Carcinoma	HER2	Dead	174
TCGA-AC-A2B8	769.967	0	1546.74	0	84	FEMALE	WHITE	Infiltrating Lobular Carcinoma	LUMA	Alive	677
TCGA-AC-A2FB	747.548	-1	1541.13	0	65	FEMALE	WHITE	Infiltrating Lobular Carcinoma	LUMA	Alive	1234
TCGA-AC-A2FE	871.664	0	1110.85	0	62	FEMALE	WHITE	Infiltrating Lobular Carcinoma	LUMA	Dead	2636
TCGA-AC-A2FG	1118.17	0	1393.63	0	79	FEMALE	WHITE	Infiltrating Lobular Carcinoma	LUMA	Alive	1853
TCGA-AC-A2FK	845.265	0	1431.3	0	45	FEMALE	WHITE	Infiltrating Lobular Carcinoma	NORMAL	Alive	2650
TCGA-AC-A2FM	1167.06	1	1257.94	-1	87	FEMALE	WHITE	Infiltrating Lobular Carcinoma	LUMA	Dead	792
TCGA-AC-A2FO	750.97	0	1570.21	0	65	FEMALE	WHITE	Infiltrating Lobular Carcinoma	LUMA	Alive	2255
TCGA-AC-A2QH	14791.4	2	2459.19	1	58	FEMALE	WHITE	Metaplastic Carcinoma	TNBC	Alive	1005
TCGA-AC-A2QI	618.904	-1	1250.83	0	76	FEMALE	WHITE	Infiltrating Lobular Carcinoma	LUMA	Alive	588
TCGA-AC-A2QJ	2689.96	-1	705.226	0	48	FEMALE	WHITE	Metaplastic Carcinoma	TNBC	Dead	446
TCGA-AC-A3EH	1031.79	0	1445.4	0	79	FEMALE	WHITE	Infiltrating Lobular Carcinoma	LUMA	Dead	197
TCGA-AC-A3HN	924.623	0	1350.99	0	87	FEMALE	WHITE	Infiltrating Lobular Carcinoma	LUMA	Alive	496
TCGA-AC-A3OD	611.522	-1	1269.65	0	68	FEMALE	WHITE	Infiltrating Lobular Carcinoma	LUMA	Alive	451
TCGA-AC-A3QP	1074.13	0	943.447	0	79	FEMALE	WHITE	Infiltrating Lobular Carcinoma	LUMA	Alive	675
TCGA-AC-A3QQ	835.91	-1	757.107	0	54	FEMALE	WHITE	Infiltrating Lobular Carcinoma	LUMA	Alive	734
TCGA-AC-A3TM	1040.56	-1	726.848	0	50	FEMALE	WHITE	Infiltrating Lobular Carcinoma	LUMA	Alive	762
TCGA-AC-A3TN	740.532	-1	763.405	0	75	FEMALE	WHITE	Infiltrating Lobular Carcinoma	LUMA	Alive	456
TCGA-AC-A3W6	897.447	-1	1132.69	0	90	FEMALE	WHITE	Infiltrating Lobular Carcinoma	LUMA	Alive	602
TCGA-AC-A3W7	747.378	-1	1241.83	0	66	FEMALE	WHITE	Infiltrating Lobular Carcinoma	LUMA	Alive	471
TCGA-AC-A3YI	2605.41	0	1077.67	0	74	FEMALE	WHITE	Infiltrating Lobular Carcinoma	NORMAL	Alive	707
TCGA-AC-A3YJ	1150.4	0	741.328	0	66	FEMALE	WHITE	Other, specify	LUMA	Alive	754
TCGA-AC-A4ZE	651.702	0	1610.42	0	63	FEMALE	WHITE	Infiltrating Lobular Carcinoma	LUMA	Alive	890
TCGA-AC-A5XS	1284.47	0	1437.77	1	74	FEMALE	WHITE	Infiltrating Lobular Carcinoma	LUMA	Alive	588
TCGA-AC-A62Y	833.539	-1	1208.08	-1	79	FEMALE	WHITE	Infiltrating Lobular Carcinoma	LUMA	Alive	530
TCGA-AC-A6IV	840.953	0	1388.59	0	47	FEMALE	WHITE	Infiltrating Lobular Carcinoma	LUMA	Alive	568
TCGA-AC-A6IX	1034.36	0	1379.64	0	49	FEMALE	WHITE	Infiltrating Lobular Carcinoma	LUMA	Alive	373
TCGA-AC-A7VC	1945.58	0	985.901	1	56	FEMALE	WHITE	Metaplastic Carcinoma	TNBC	Alive	1
TCGA-AC-A8OR	904.644	0	1053.36	0	75	FEMALE	WHITE	Mucinous Carcinoma	LUMA	Alive	40
TCGA-AC-A8OS	715.101	-1	1330.11	0	71	FEMALE	WHITE	Infiltrating Lobular Carcinoma	LUMA	Alive	70
TCGA-AN-A03X	352.097	0	1230.43	0	74	FEMALE	WHITE	Infiltrating Ductal Carcinoma	LUMA	Alive	10
TCGA-AN-A03Y	683.816	0	1496.61	1	66	FEMALE	WHITE	Infiltrating Ductal Carcinoma	LUMB	Alive	10
TCGA-AN-A041	554.781	-1	1579.35	1	29	FEMALE	WHITE	Infiltrating Ductal Carcinoma	LUMA	Alive	7
TCGA-AN-A046	1008.71	-1	1000.38	0	68	FEMALE	WHITE	Infiltrating Ductal Carcinoma	LUMA	Alive	10
TCGA-AN-A049	728.516	0	1341.17	0	62	FEMALE	WHITE	Infiltrating Ductal Carcinoma	LUMA	Alive	19
TCGA-AN-A04A	598.74	-1	1823.53	1	36	FEMALE	WHITE	Infiltrating Ductal Carcinoma	LUMA	Alive	90
TCGA-AN-A04C	1026.07	-1	1122.54	1	51	FEMALE	WHITE	Infiltrating Ductal Carcinoma	HER2	Alive	54
TCGA-AN-A04D	316.729	-1	817.449	0	58	FEMALE	WHITE	Infiltrating Ductal Carcinoma	TNBC	Alive	52
TCGA-AN-A0AJ	615.477	-1	2200.52	1	79	FEMALE	WHITE	Infiltrating Ductal Carcinoma	LUMB	Alive	303
TCGA-AN-A0AK	1777.92	0	1471.45	0	76	FEMALE	WHITE	Infiltrating Ductal Carcinoma	LUMB	Alive	224
TCGA-AN-A0AL	1464.98	-1	1431.16	1	41	FEMALE	WHITE	Infiltrating Ductal Carcinoma	TNBC	Alive	227
TCGA-AN-A0AM	920.859	-1	1068.7	0	56	FEMALE	WHITE	Infiltrating Ductal Carcinoma	LUMB	Alive	5
TCGA-AN-A0AR	2314.31	0	1028.94	0	55	FEMALE	WHITE	Infiltrating Ductal Carcinoma	TNBC	Alive	10
TCGA-AN-A0AS	1435.91	-1	1389.5	0	70	FEMALE	WHITE	Infiltrating Ductal Carcinoma	LUMA	Alive	10
TCGA-AN-A0AT	1603.92	-1	1733.64	1	62	FEMALE	WHITE	Infiltrating Ductal Carcinoma	TNBC	Alive	10
TCGA-AN-A0FD	649.106	0	1042.8	0	71	FEMALE	WHITE	Infiltrating Ductal Carcinoma	LUMA	Alive	196
TCGA-AN-A0FF	874.206	0	1180.82	0	32	FEMALE	WHITE	Infiltrating Ductal Carcinoma	LUMB	Alive	172
TCGA-AN-A0FJ	2270.71	0	1410.56	0	59	FEMALE	WHITE	Infiltrating Ductal Carcinoma	TNBC	Alive	242
TCGA-AN-A0FK	865.73	0	1244.25	1	88	FEMALE	WHITE	Infiltrating Ductal Carcinoma	LUMA	Alive	213
TCGA-AN-A0FL	1277.29	-1	1227.54	1	62	FEMALE	WHITE	Infiltrating Ductal Carcinoma	TNBC	Alive	231
TCGA-AN-A0FN	930.2	0	1304.1	0	61	FEMALE	WHITE	Infiltrating Lobular Carcinoma	LUMA	Alive	218
TCGA-AN-A0FS	687.031	0	1471.05	0	55	FEMALE	WHITE	Infiltrating Lobular Carcinoma	LUMA	Alive	210
TCGA-AN-A0FT	3797.07	2	853.987	0	63	FEMALE	WHITE	Infiltrating Ductal Carcinoma	LUMA	Alive	214
TCGA-AN-A0FV	1756.31	1	1185.6	-1	58	FEMALE	WHITE	Infiltrating Ductal Carcinoma	HER2	Alive	10
TCGA-AN-A0FW	728.634	0	1851.53	1	67	FEMALE	WHITE	Infiltrating Ductal Carcinoma	LUMA	Alive	11
TCGA-AN-A0FX	588.517	-1	2359.49	1	52	FEMALE	WHITE	Infiltrating Ductal Carcinoma	TNBC	Alive	10
TCGA-AN-A0FY	1019.73	-1	1427.95	1	55	FEMALE	WHITE	Infiltrating Ductal Carcinoma	LUMB	Alive	10
TCGA-AN-A0FZ	386.464	-1	1569.51	0	45	FEMALE	WHITE	Infiltrating Ductal Carcinoma	LUMA	Alive	10
TCGA-AN-A0XL	445.004	-1	1335.76	0	61	FEMALE	WHITE	Infiltrating Ductal Carcinoma	LUMA	Alive	163
TCGA-AN-A0XN	655.044	-1	1727.02	1	68	FEMALE	WHITE	Infiltrating Ductal Carcinoma	LUMA	Alive	10
TCGA-AN-A0XO	976.761	0	1325.56	0	59	FEMALE	WHITE	Infiltrating Ductal Carcinoma	LUMA	Alive	375
TCGA-AN-A0XP	410.289	-1	1357.23	0	69	FEMALE	WHITE	Infiltrating Ductal Carcinoma	LUMA	Alive	9
TCGA-AN-A0XR	431.997	-1	1167.01	0	55	FEMALE	WHITE	Infiltrating Ductal Carcinoma	LUMB	Alive	10
TCGA-AN-A0XS	936.662	0	1431.64	0	63	FEMALE	WHITE	Infiltrating Ductal Carcinoma	LUMA	Alive	10
TCGA-AN-A0XT	1142.8	2	1523.3	0	54	FEMALE	WHITE	Infiltrating Ductal Carcinoma	LUMA	Alive	10
TCGA-AN-A0XU	1558.58	-1	767.057	-1	54	FEMALE	WHITE	Infiltrating Ductal Carcinoma	TNBC	Alive	10
TCGA-AN-A0XV	869.247	0	1287.66	0	67	FEMALE	WHITE	Infiltrating Ductal Carcinoma	LUMA	Alive	162
TCGA-AN-A0XW	721.649	0	1378.72	0	36	FEMALE	WHITE	Infiltrating Ductal Carcinoma	LUMA	Alive	170
TCGA-AO-A03M	1084.86	-1	1602.83	0	29	FEMALE	WHITE	Infiltrating Ductal Carcinoma	LUMA	Alive	1866
TCGA-AO-A03N	853.781	-1	1354.53	1	59	FEMALE	WHITE	Infiltrating Ductal Carcinoma	LUMB	Alive	2031
TCGA-AO-A03R	769.821	-1	1270.57	0	57	FEMALE	WHITE	Infiltrating Ductal Carcinoma	NORMAL	Alive	2091
TCGA-AO-A03T	1422.29	0	1022.75	0	42	FEMALE	WHITE	Infiltrating Ductal Carcinoma	NORMAL	Alive	2124
TCGA-AO-A03U	1581.32	0	1490.39	0	31	FEMALE	WHITE	Other, specify	NORMAL	Dead	1793
TCGA-AO-A03V	659.608	-1	1716.86	0	41	FEMALE	WHITE	Infiltrating Ductal Carcinoma	LUMA	Alive	1351
TCGA-AO-A0J2	1398.49	-1	1426.7	1	41	FEMALE	WHITE	Infiltrating Ductal Carcinoma	HER2	Alive	997
TCGA-AO-A0J3	368.967	-1	654.451	-1	67	FEMALE	WHITE	Other, specify	LUMB	Alive	651
TCGA-AO-A0J5	586.768	0	1463.98	0	48	FEMALE	WHITE	Other, specify	LUMA	Dead	792
TCGA-AO-A0J6	2591.94	0	1459.37	0	61	FEMALE	WHITE	Infiltrating Ductal Carcinoma	TNBC	Alive	1140
TCGA-AO-A0J7	1143.22	1	948.801	-1	71	FEMALE	WHITE	Other, specify	LUMB	Alive	618
TCGA-AO-A0J8	1121.56	0	859.272	-1	61	FEMALE	WHITE	Infiltrating Lobular Carcinoma	LUMA	Alive	680
TCGA-AO-A0J9	1018.72	0	997.965	0	61	FEMALE	WHITE	Infiltrating Lobular Carcinoma	LUMA	Alive	1613
TCGA-AO-A0JB	822.161	-1	779.754	0	50	FEMALE	WHITE	Infiltrating Ductal Carcinoma	NORMAL	Alive	1542
TCGA-AO-A0JC	1308.67	0	1531.96	0	64	FEMALE	WHITE	Infiltrating Ductal Carcinoma	LUMA	Alive	1547
TCGA-AO-A0JD	468.818	-1	1971.22	0	59	FEMALE	WHITE	Infiltrating Ductal Carcinoma	LUMB	Alive	2190
TCGA-AO-A0JF	643.351	0	1709.84	0	68	FEMALE	WHITE	Infiltrating Ductal Carcinoma	LUMA	Alive	1980
TCGA-AO-A0JG	731.028	0	1058.45	-1	49	FEMALE	WHITE	Other, specify	LUMA	Alive	798
TCGA-AO-A0JI	701.628	0	1852.33	0	56	FEMALE	WHITE	Infiltrating Ductal Carcinoma	LUMA	Alive	1528
TCGA-AO-A0JJ	619.373	0	1066.98	-1	54	FEMALE	WHITE	Infiltrating Lobular Carcinoma	LUMA	Alive	1887
TCGA-AO-A0JL	1426.83	1	1196.97	1	59	FEMALE	WHITE	Infiltrating Ductal Carcinoma	TNBC	Alive	1683
TCGA-AO-A124	915.038	-1	2640.61	1	38	FEMALE	WHITE	Other, specify	TNBC	Alive	3506
TCGA-AO-A128	1314.79	0	1472.18	0	61	FEMALE	WHITE	Infiltrating Ductal Carcinoma	TNBC	Alive	3248
TCGA-AO-A129	1400.77	-1	705.792	0	29	FEMALE	WHITE	Infiltrating Ductal Carcinoma	TNBC	Alive	3286
TCGA-AO-A12A	790.174	0	1109.52	0	47	FEMALE	WHITE	Infiltrating Ductal Carcinoma	LUMA	Alive	3112
TCGA-AO-A12B	770.483	1	1076.65	1	63	FEMALE	WHITE	Infiltrating Ductal Carcinoma	LUMA	Alive	2989
TCGA-AO-A12D	1506.19	-1	1710.44	0	43	FEMALE	WHITE	Infiltrating Ductal Carcinoma	HER2	Alive	2515
TCGA-AO-A12E	1082.51	1	1206.83	0	51	FEMALE	WHITE	Infiltrating Lobular Carcinoma	LUMA	Alive	2142
TCGA-AO-A12F	1390.05	0	1062.36	0	36	FEMALE	WHITE	Infiltrating Ductal Carcinoma	TNBC	Alive	1842
TCGA-AO-A12G	632.8	-1	1313.6	0	75	FEMALE	WHITE	Other, specify	LUMA	Alive	1639
TCGA-AO-A1KO	801.94	0	1577.12	0	46	FEMALE	WHITE	Infiltrating Lobular Carcinoma	NORMAL	Alive	622
TCGA-AO-A1KP	536.149	0	1358.44	0	77	FEMALE	WHITE	Infiltrating Ductal Carcinoma	LUMB	Alive	2953
TCGA-AO-A1KR	1678.26	-1	678.261	-1	51	FEMALE	WHITE	Infiltrating Ductal Carcinoma	TNBC	Alive	2513
TCGA-AO-A1KS	341.403	-1	2227.88	1	69	FEMALE	WHITE	Infiltrating Lobular Carcinoma	LUMB	Alive	350
TCGA-AO-A1KT	1292.54	0	2116.36	1	78	FEMALE	WHITE	Infiltrating Ductal Carcinoma	LUMB	Alive	541
TCGA-AQ-A04H	481.928	-1	1614.75	0	61	FEMALE	WHITE	Infiltrating Ductal Carcinoma	LUMB	Alive	754
TCGA-AQ-A04J	1091.72	-1	1712.15	0	45	FEMALE	WHITE	Infiltrating Ductal Carcinoma	TNBC	Alive	819
TCGA-AQ-A04L	1485.89	-1	697.468	-1	48	FEMALE	WHITE	Infiltrating Ductal Carcinoma	LUMA	Alive	3957
TCGA-AQ-A0Y5	606.125	-1	2106.08	1	70	FEMALE	WHITE	Infiltrating Ductal Carcinoma	LUMA	Dead	172
TCGA-AQ-A1H2	1016.81	0	1536.13	0	84	FEMALE	WHITE	Infiltrating Ductal Carcinoma	LUMA	Alive	475
TCGA-AQ-A1H3	800.102	1	1426.61	0	49	FEMALE	WHITE	Infiltrating Ductal Carcinoma	LUMA	Alive	989
TCGA-AQ-A7U7	803.849	0	1532.35	1	55	FEMALE	WHITE	Infiltrating Lobular Carcinoma	LUMA	Dead	584
TCGA-AR-A0TP	601.376	-1	2085.45	1	43	FEMALE	WHITE	Infiltrating Ductal Carcinoma	TNBC	Alive	4275
TCGA-AR-A0TQ	778.052	1	1270.11	-1	27	FEMALE	WHITE	Infiltrating Ductal Carcinoma	LUMB	Alive	2991
TCGA-AR-A0TR	283.444	-1	1827.28	1	68	FEMALE	WHITE	Infiltrating Ductal Carcinoma	LUMA	Dead	160
TCGA-AR-A0TS	942.043	0	2590.7	1	46	FEMALE	WHITE	Infiltrating Ductal Carcinoma	TNBC	Alive	2558
TCGA-AR-A0TW	654.898	-1	1409.97	0	50	FEMALE	WHITE	Infiltrating Ductal Carcinoma	LUMA	Alive	3009
TCGA-AR-A0TY	442.76	-1	1271.2	0	54	FEMALE	WHITE	Infiltrating Ductal Carcinoma	LUMB	Dead	1699
TCGA-AR-A0TZ	382.627	-1	2281.89	0	43	FEMALE	WHITE	Infiltrating Ductal Carcinoma	LUMA	Dead	3262
TCGA-AR-A0U0	1535.81	0	2109.2	1	73	FEMALE	WHITE	Infiltrating Ductal Carcinoma	TNBC	Alive	1988
TCGA-AR-A0U1	1614.13	-1	951.876	-1	36	FEMALE	WHITE	Infiltrating Ductal Carcinoma	TNBC	Alive	4052
TCGA-AR-A0U2	653.384	-1	1671.45	0	47	FEMALE	WHITE	Infiltrating Ductal Carcinoma	LUMB	Dead	2551
TCGA-AR-A0U3	589.846	-1	1591.56	0	59	FEMALE	WHITE	Infiltrating Ductal Carcinoma	LUMA	Alive	4080
TCGA-AR-A0U4	1235.31	-1	1495.71	0	54	FEMALE	WHITE	Infiltrating Ductal Carcinoma	TNBC	Alive	3261
TCGA-AR-A1AH	1766.09	-1	2188.33	0	51	FEMALE	WHITE	Infiltrating Ductal Carcinoma	TNBC	Alive	3807
TCGA-AR-A1AI	1069.78	1	1697.07	0	47	FEMALE	WHITE	Medullary Carcinoma	TNBC	Alive	3296
TCGA-AR-A1AJ	1514.57	-1	1736.96	0	83	FEMALE	WHITE	Infiltrating Ductal Carcinoma	TNBC	Alive	3072
TCGA-AR-A1AK	791.222	0	1374.46	0	70	FEMALE	WHITE	Infiltrating Lobular Carcinoma	LUMA	Alive	3159
TCGA-AR-A1AL	1087.22	0	1405.79	0	60	FEMALE	WHITE	Infiltrating Lobular Carcinoma	LUMA	Alive	2971
TCGA-AR-A1AM	851.061	-1	1373.08	0	52	FEMALE	WHITE	Infiltrating Lobular Carcinoma	LUMA	Alive	2991
TCGA-AR-A1AN	912.057	-1	1430.07	0	46	FEMALE	WHITE	Infiltrating Ductal Carcinoma	LUMA	Alive	2920
TCGA-AR-A1AO	1313.51	0	1555.65	0	47	FEMALE	WHITE	Infiltrating Ductal Carcinoma	NORMAL	Alive	2618
TCGA-AR-A1AP	1121.01	0	977.958	-1	80	FEMALE	WHITE	Infiltrating Ductal Carcinoma	LUMA	Alive	2856
TCGA-AR-A1AQ	1163.22	-1	1011.88	-1	49	FEMALE	WHITE	Infiltrating Ductal Carcinoma	TNBC	Alive	3021
TCGA-AR-A1AR	1074.39	-1	2404.6	0	50	FEMALE	WHITE	Infiltrating Ductal Carcinoma	TNBC	Dead	524
TCGA-AR-A1AU	526.628	-1	938.444	-1	39	FEMALE	WHITE	Infiltrating Ductal Carcinoma	LUMA	Alive	2868
TCGA-AR-A1AW	883.466	1	1771.85	0	65	FEMALE	WHITE	Infiltrating Ductal Carcinoma	LUMB	Alive	2632
TCGA-AR-A1AX	806.805	-1	1596.6	0	64	FEMALE	WHITE	Infiltrating Ductal Carcinoma	LUMA	Alive	2629
TCGA-AR-A1AY	888.032	-1	2021.86	1	65	FEMALE	WHITE	Infiltrating Ductal Carcinoma	TNBC	Alive	1026
TCGA-AR-A24H	786.281	1	1998.83	1	65	FEMALE	WHITE	Infiltrating Lobular Carcinoma	LUMB	Alive	4894
TCGA-AR-A24K	648.736	1	1354.2	-1	46	FEMALE	WHITE	Infiltrating Ductal Carcinoma	LUMB	Alive	1548
TCGA-AR-A24L	650.562	0	2267.69	0	26	FEMALE	WHITE	Infiltrating Ductal Carcinoma	LUMA	Dead	2866
TCGA-AR-A24M	514.979	0	1655.54	0	38	FEMALE	WHITE	Mixed Histology (please specify)	LUMA	Alive	3660
TCGA-AR-A24N	633.597	0	1627.74	0	54	FEMALE	WHITE	Infiltrating Ductal Carcinoma	LUMB	Alive	3035
TCGA-AR-A24O	747.115	0	1606.59	0	43	FEMALE	WHITE	Mixed Histology (please specify)	LUMA	Alive	3607
TCGA-AR-A24P	479.676	-1	1165.92	-1	47	FEMALE	WHITE	Infiltrating Ductal Carcinoma	LUMA	Alive	84
TCGA-AR-A24Q	664.047	-1	1627.37	1	49	FEMALE	WHITE	Infiltrating Ductal Carcinoma	TNBC	Alive	3172
TCGA-AR-A24R	546.473	-1	1037.45	-1	45	FEMALE	WHITE	Infiltrating Ductal Carcinoma	LUMB	Alive	3430
TCGA-AR-A24S	700.556	-1	1896.78	0	61	FEMALE	WHITE	Infiltrating Ductal Carcinoma	LUMB	Alive	2976
TCGA-AR-A24T	457.364	-1	1807.55	0	46	FEMALE	WHITE	Infiltrating Lobular Carcinoma	LUMA	Alive	3202
TCGA-AR-A24U	995.717	-1	2021.23	0	47	FEMALE	WHITE	Infiltrating Ductal Carcinoma	HER2	Alive	3128
TCGA-AR-A24V	509.517	-1	1503.58	-1	52	FEMALE	WHITE	Infiltrating Ductal Carcinoma	LUMA	Alive	3203
TCGA-AR-A24W	1274.33	0	1662.14	0	55	FEMALE	WHITE	Infiltrating Ductal Carcinoma	LUMA	Alive	1550
TCGA-AR-A24X	834.999	0	1311.93	0	52	FEMALE	WHITE	Mixed Histology (please specify)	LUMA	Alive	3004
TCGA-AR-A24Z	702.529	1	1081.61	-1	57	FEMALE	WHITE	Infiltrating Ductal Carcinoma	LUMB	Alive	3001
TCGA-AR-A250	530.905	-1	1814.29	1	58	FEMALE	WHITE	Infiltrating Ductal Carcinoma	LUMB	Alive	2707
TCGA-AR-A251	1585.37	0	3321.79	1	51	FEMALE	WHITE	Infiltrating Ductal Carcinoma	TNBC	Alive	3030
TCGA-AR-A252	673.481	-1	1558.22	-1	50	FEMALE	WHITE	Infiltrating Ductal Carcinoma	LUMA	Alive	2838
TCGA-AR-A254	613.238	-1	1733.63	0	50	FEMALE	WHITE	Infiltrating Ductal Carcinoma	HER2	Alive	2605
TCGA-AR-A255	528.864	-1	2287.4	1	62	FEMALE	WHITE	Infiltrating Ductal Carcinoma	LUMA	Alive	2161
TCGA-AR-A256	1332.35	-1	1402.17	0	45	FEMALE	WHITE	Infiltrating Ductal Carcinoma	TNBC	Dead	2854
TCGA-AR-A2LE	394.711	-1	1372.75	0	69	FEMALE	WHITE	Infiltrating Lobular Carcinoma	LUMA	Alive	5062
TCGA-AR-A2LH	1250.26	0	1660.88	0	55	FEMALE	WHITE	Infiltrating Lobular Carcinoma	NORMAL	Dead	616
TCGA-AR-A2LJ	1768.11	0	983.982	0	40	FEMALE	WHITE	Infiltrating Lobular Carcinoma	LUMA	Alive	2632
TCGA-AR-A2LK	680.708	1	1696.3	0	62	FEMALE	WHITE	Infiltrating Lobular Carcinoma	LUMB	Dead	1649
TCGA-AR-A2LM	411.778	-1	1423.42	0	49	FEMALE	WHITE	Infiltrating Lobular Carcinoma	LUMA	Alive	1935
TCGA-AR-A2LN	839.939	0	1441.25	0	65	FEMALE	WHITE	Infiltrating Lobular Carcinoma	LUMA	Alive	1161
TCGA-AR-A2LO	845.917	0	1441.71	0	46	FEMALE	WHITE	Infiltrating Lobular Carcinoma	LUMA	Alive	1198
TCGA-AR-A2LQ	855.076	0	1449	0	59	FEMALE	WHITE	Infiltrating Lobular Carcinoma	NORMAL	Alive	1233
TCGA-AR-A5QM	1739.77	1	1164.15	0	62	FEMALE	WHITE	Infiltrating Lobular Carcinoma	LUMA	Alive	2231
TCGA-AR-A5QN	839.745	0	1292.94	0	68	FEMALE	WHITE	Infiltrating Lobular Carcinoma	LUMA	Alive	1013
TCGA-AR-A5QP	801.123	0	1472.33	0	54	FEMALE	WHITE	Infiltrating Lobular Carcinoma	LUMA	Alive	1185
TCGA-AR-A5QQ	1517.64	0	1404.87	0	68	FEMALE	WHITE	Other, specify	TNBC	Dead	322
TCGA-B6-A0I2	2603.83	0	1230.21	1	45	FEMALE	WHITE	Infiltrating Ductal Carcinoma	TNBC	Alive	4361
TCGA-B6-A0I5	1226.84	0	614.258	0	49	FEMALE	WHITE	Infiltrating Ductal Carcinoma	LUMA	Alive	8556
TCGA-B6-A0I9	740.918	0	2163.8	1	62	FEMALE	WHITE	Infiltrating Ductal Carcinoma	HER2	Dead	362
TCGA-B6-A0IA	770.115	0	824.521	1	51	FEMALE	WHITE	Other, specify	LUMA	Alive	8391
TCGA-B6-A0IB	778.28	-1	984.486	0	64	FEMALE	WHITE	Infiltrating Ductal Carcinoma	LUMB	Dead	3941
TCGA-B6-A0IC	800.625	0	1160.7	0	90	FEMALE	WHITE	Other, specify	LUMA	Dead	1542
TCGA-B6-A0IG	794.714	-1	1249.23	0	50	FEMALE	WHITE	Infiltrating Ductal Carcinoma	LUMA	Dead	4456
TCGA-B6-A0IH	727.86	-1	1412	0	81	FEMALE	WHITE	Infiltrating Lobular Carcinoma	LUMA	Dead	3418
TCGA-B6-A0IK	788.439	-1	1752.6	0	63	FEMALE	WHITE	Infiltrating Ductal Carcinoma	HER2	Dead	571
TCGA-B6-A0IN	869.504	-1	1131.2	1	45	FEMALE	WHITE	Other, specify	LUMB	Dead	2573
TCGA-B6-A0IO	660.252	-1	1149.44	1	66	FEMALE	WHITE	Infiltrating Ductal Carcinoma	LUMA	Alive	5042
TCGA-B6-A0IP	911.747	0	1053.48	0	74	FEMALE	WHITE	Infiltrating Lobular Carcinoma	LUMA	Dead	3926
TCGA-B6-A0IQ	1745.08	-1	1049.51	0	40	FEMALE	WHITE	Infiltrating Ductal Carcinoma	TNBC	Alive	4285
TCGA-B6-A0RG	524.402	-1	1080.82	0	26	FEMALE	WHITE	Infiltrating Ductal Carcinoma	LUMA	Alive	2082
TCGA-B6-A0RI	419.865	-1	1321.83	0	44	FEMALE	WHITE	Infiltrating Ductal Carcinoma	LUMA	Alive	7126
TCGA-B6-A0RN	576.965	0	1100.88	0	60	FEMALE	WHITE	Infiltrating Ductal Carcinoma	LUMA	Alive	8008
TCGA-B6-A0RO	755.439	0	1826.99	1	71	FEMALE	WHITE	Infiltrating Ductal Carcinoma	LUMA	Alive	4929
TCGA-B6-A0RP	664.263	0	1536.2	0	73	FEMALE	WHITE	Mixed Histology (please specify)	LUMA	Dead	3126
TCGA-B6-A0RQ	939.285	0	1282	0	68	FEMALE	WHITE	Infiltrating Lobular Carcinoma	NORMAL	Dead	4267
TCGA-B6-A0RS	1520.83	1	1182.45	0	38	FEMALE	WHITE	Infiltrating Ductal Carcinoma	HER2	Dead	3063
TCGA-B6-A0RT	1264.66	0	1554.6	0	39	FEMALE	WHITE	Infiltrating Ductal Carcinoma	TNBC	Alive	2721
TCGA-B6-A0RU	738.033	-1	1802.86	1	40	FEMALE	WHITE	Other, specify	TNBC	Alive	8605
TCGA-B6-A0RV	491.532	-1	1464.11	0	42	FEMALE	WHITE	Mixed Histology (please specify)	LUMA	Alive	5156
TCGA-B6-A0WT	556.868	0	1908.02	1	61	FEMALE	WHITE	Infiltrating Ductal Carcinoma	LUMA	Alive	5739
TCGA-B6-A0WV	778.678	1	1090.42	-1	67	FEMALE	WHITE	Infiltrating Ductal Carcinoma	LUMB	Dead	2417
TCGA-B6-A0WY	1211.91	1	1376.12	1	40	FEMALE	WHITE	Infiltrating Ductal Carcinoma	LUMA	Dead	3461
TCGA-B6-A0X0	913.647	0	949.275	0	54	FEMALE	WHITE	Other, specify	LUMA	Dead	3945
TCGA-B6-A0X1	2362.28	-1	1630.11	1	48	FEMALE	WHITE	Infiltrating Ductal Carcinoma	TNBC	Dead	7455
TCGA-B6-A0X4	844.156	0	894.923	0	62	FEMALE	WHITE	Infiltrating Ductal Carcinoma	LUMA	Dead	860
TCGA-B6-A0X7	452.798	-1	1250.94	0	62	FEMALE	WHITE	Mixed Histology (please specify)	LUMA	Dead	1781
TCGA-B6-A1KC	354.288	1	1969.37	1	67	FEMALE	WHITE	Infiltrating Ductal Carcinoma	LUMB	Alive	1326
TCGA-B6-A1KF	1991.71	0	2299.04	1	68	FEMALE	WHITE	Infiltrating Ductal Carcinoma	TNBC	Alive	3088
TCGA-B6-A1KI	774.941	1	1263.79	0	63	FEMALE	WHITE	Infiltrating Ductal Carcinoma	LUMA	Alive	2236
TCGA-B6-A1KN	630.72	-1	2204.9	0	57	FEMALE	WHITE	Infiltrating Ductal Carcinoma	LUMB	Alive	4233
TCGA-B6-A2IU	799.425	0	1670.02	0	62	FEMALE	WHITE	Infiltrating Lobular Carcinoma	LUMA	Alive	5176
TCGA-B6-A40B	1498.01	0	731.41	0	76	FEMALE	WHITE	Infiltrating Lobular Carcinoma	LUMA	Alive	3152
TCGA-B6-A40C	989.162	0	1378.79	1	51	FEMALE	WHITE	Infiltrating Lobular Carcinoma	LUMA	Alive	2164
TCGA-BH-A0AU	933.213	1	1375.45	-1	45	FEMALE	WHITE	Infiltrating Ductal Carcinoma	LUMB	Alive	1914
TCGA-BH-A0AW	1380.31	2	1328.24	1	56	FEMALE	WHITE	Infiltrating Ductal Carcinoma	HER2	Alive	622
TCGA-BH-A0AY	731.856	-1	1560.63	1	62	FEMALE	WHITE	Infiltrating Ductal Carcinoma	LUMA	Alive	777
TCGA-BH-A0AZ	910.398	0	1297.08	0	47	FEMALE	WHITE	Infiltrating Ductal Carcinoma	LUMA	Alive	1919
TCGA-BH-A0B3	1144.83	1	1797.49	1	53	FEMALE	WHITE	Infiltrating Ductal Carcinoma	TNBC	Alive	1203
TCGA-BH-A0B5	662.775	-1	1164.78	-1	40	FEMALE	WHITE	Infiltrating Lobular Carcinoma	LUMA	Alive	2136
TCGA-BH-A0B7	1912.08	0	1647.61	0	42	FEMALE	WHITE	Infiltrating Ductal Carcinoma	HER2	Alive	2559
TCGA-BH-A0B9	984.774	-1	1094.04	0	44	FEMALE	WHITE	Infiltrating Ductal Carcinoma	TNBC	Alive	1572
TCGA-BH-A0BA	535.001	-1	1843.54	1	51	FEMALE	WHITE	Mixed Histology (please specify)	LUMA	Alive	1132
TCGA-BH-A0BC	659.422	-1	1140.7	0	60	FEMALE	WHITE	Infiltrating Ductal Carcinoma	LUMA	Alive	974
TCGA-BH-A0BD	869.196	0	1469.59	0	47	FEMALE	WHITE	Infiltrating Ductal Carcinoma	LUMB	Alive	554
TCGA-BH-A0BF	856.015	-1	1624.19	1	56	FEMALE	WHITE	Infiltrating Ductal Carcinoma	LUMB	Dead	1324
TCGA-BH-A0BG	1286.32	0	1217.18	1	73	FEMALE	WHITE	Infiltrating Ductal Carcinoma	TNBC	Alive	1871
TCGA-BH-A0BJ	699.722	0	1523.89	0	41	FEMALE	WHITE	Infiltrating Ductal Carcinoma	LUMA	Alive	660
TCGA-BH-A0BL	880.867	0	2114.32	1	35	FEMALE	WHITE	Infiltrating Ductal Carcinoma	TNBC	Alive	2278
TCGA-BH-A0BM	585.35	-1	1110.19	0	54	FEMALE	WHITE	Infiltrating Ductal Carcinoma	LUMA	Alive	1876
TCGA-BH-A0BO	3536.06	0	985.055	0	54	FEMALE	WHITE	Infiltrating Ductal Carcinoma	LUMA	Alive	2197
TCGA-BH-A0BP	939.819	-1	1310.93	-1	76	FEMALE	WHITE	Infiltrating Ductal Carcinoma	LUMA	Dead	2296
TCGA-BH-A0BQ	1070.97	0	1337.43	0	39	FEMALE	WHITE	Infiltrating Ductal Carcinoma	LUMA	Alive	2255
TCGA-BH-A0BR	1230.47	-1	1826.18	0	59	FEMALE	WHITE	Infiltrating Ductal Carcinoma	LUMA	Alive	2330
TCGA-BH-A0BS	650.593	0	1564.66	0	55	FEMALE	WHITE	Infiltrating Ductal Carcinoma	LUMA	Alive	2612
TCGA-BH-A0BT	1361.72	1	1522.01	1	56	FEMALE	WHITE	Infiltrating Ductal Carcinoma	LUMA	Alive	2365
TCGA-BH-A0BV	636.224	0	1380.28	0	78	FEMALE	WHITE	Infiltrating Ductal Carcinoma	LUMA	Alive	1519
TCGA-BH-A0BZ	848.668	-1	1511.06	1	59	FEMALE	WHITE	Infiltrating Ductal Carcinoma	LUMB	Alive	2255
TCGA-BH-A0C0	989.493	-1	1182.73	-1	62	FEMALE	WHITE	Infiltrating Ductal Carcinoma	LUMB	Alive	1270
TCGA-BH-A0C1	705.63	-1	1623.28	1	61	FEMALE	WHITE	Infiltrating Lobular Carcinoma	LUMA	Dead	1411
TCGA-BH-A0C3	1579.53	0	1611.25	-1	47	FEMALE	WHITE	Mixed Histology (please specify)	LUMB	Alive	2709
TCGA-BH-A0C7	370.694	-1	1600.26	0	48	FEMALE	WHITE	Infiltrating Ductal Carcinoma	LUMB	Alive	2767
TCGA-BH-A0DE	736.201	-1	918.655	-1	62	FEMALE	WHITE	Infiltrating Ductal Carcinoma	LUMA	Alive	2372
TCGA-BH-A0DH	670.681	0	1964.25	1	63	FEMALE	WHITE	Infiltrating Ductal Carcinoma	LUMA	Alive	1156
TCGA-BH-A0DI	828.26	-1	1495.93	0	63	FEMALE	WHITE	Infiltrating Ductal Carcinoma	LUMA	Alive	912
TCGA-BH-A0DK	809.181	-1	1201.62	0	49	FEMALE	WHITE	Infiltrating Ductal Carcinoma	LUMA	Alive	423
TCGA-BH-A0DL	807.288	-1	1218.04	-1	64	FEMALE	WHITE	Other, specify	TNBC	Alive	2381
TCGA-BH-A0DO	668.371	0	1150.84	0	78	FEMALE	WHITE	Infiltrating Ductal Carcinoma	LUMA	Alive	1644
TCGA-BH-A0DP	821.26	1	1075.87	-1	60	FEMALE	WHITE	Infiltrating Lobular Carcinoma	LUMA	Alive	476
TCGA-BH-A0DQ	626.073	0	1864.73	1	42	FEMALE	WHITE	Infiltrating Ductal Carcinoma	LUMA	Alive	98
TCGA-BH-A0DS	848.776	0	1106.1	0	71	FEMALE	WHITE	Infiltrating Ductal Carcinoma	LUMA	Alive	78
TCGA-BH-A0DT	725.171	0	1150.44	0	41	FEMALE	WHITE	Infiltrating Ductal Carcinoma	LUMA	Alive	2403
TCGA-BH-A0DV	915.706	0	1535	0	54	FEMALE	WHITE	Infiltrating Ductal Carcinoma	LUMA	Alive	2064
TCGA-BH-A0DX	1802.01	0	1257.91	0	62	FEMALE	WHITE	Infiltrating Ductal Carcinoma	LUMA	Alive	2156
TCGA-BH-A0DZ	643.22	0	1827.97	0	43	FEMALE	WHITE	Infiltrating Ductal Carcinoma	LUMA	Alive	495
TCGA-BH-A0E0	941.499	-1	1829.37	0	38	FEMALE	WHITE	Infiltrating Ductal Carcinoma	TNBC	Alive	134
TCGA-BH-A0E1	956.565	0	1157.3	0	52	FEMALE	WHITE	Infiltrating Ductal Carcinoma	LUMA	Alive	477
TCGA-BH-A0E6	1562.62	-1	770.093	0	69	FEMALE	WHITE	Infiltrating Ductal Carcinoma	TNBC	Alive	293
TCGA-BH-A0E7	693.721	0	1911.4	0	79	FEMALE	WHITE	Infiltrating Ductal Carcinoma	LUMA	Alive	1363
TCGA-BH-A0E9	723.702	-1	1609.48	0	53	FEMALE	WHITE	Infiltrating Lobular Carcinoma	LUMA	Alive	2489
TCGA-BH-A0EA	919.727	0	1322.17	0	72	FEMALE	WHITE	Infiltrating Ductal Carcinoma	LUMA	Dead	991
TCGA-BH-A0EB	876.852	0	1267.7	1	69	FEMALE	WHITE	Infiltrating Ductal Carcinoma	LUMA	Alive	745
TCGA-BH-A0EE	705.941	-1	1120	0	68	FEMALE	WHITE	Infiltrating Ductal Carcinoma	HER2	Alive	943
TCGA-BH-A0EI	315.952	-1	1372.34	0	51	FEMALE	WHITE	Infiltrating Ductal Carcinoma	LUMA	Alive	1926
TCGA-BH-A0GY	1975.2	0	1670.87	0	67	FEMALE	WHITE	Infiltrating Ductal Carcinoma	LUMA	Alive	923
TCGA-BH-A0GZ	686.793	0	1124.37	0	62	FEMALE	WHITE	Infiltrating Ductal Carcinoma	LUMA	Alive	328
TCGA-BH-A0H0	356.052	-1	1282.92	0	69	FEMALE	WHITE	Infiltrating Ductal Carcinoma	LUMB	Alive	461
TCGA-BH-A0H3	708.616	0	1367.22	0	46	FEMALE	WHITE	Infiltrating Ductal Carcinoma	LUMA	Alive	1928
TCGA-BH-A0H5	955.092	0	1580.91	0	45	FEMALE	WHITE	Infiltrating Ductal Carcinoma	LUMA	Alive	1620
TCGA-BH-A0H6	973.236	0	1094.48	0	82	FEMALE	WHITE	Infiltrating Ductal Carcinoma	LUMA	Alive	747
TCGA-BH-A0H7	951.083	1	1967.17	1	65	FEMALE	WHITE	Infiltrating Ductal Carcinoma	LUMA	Alive	702
TCGA-BH-A0H9	859.349	0	1567	0	69	FEMALE	WHITE	Infiltrating Ductal Carcinoma	LUMA	Alive	1247
TCGA-BH-A0HA	700.452	-1	1021.45	0	31	FEMALE	WHITE	Infiltrating Ductal Carcinoma	LUMA	Alive	1611
TCGA-BH-A0HB	703.013	-1	1288.86	0	55	FEMALE	WHITE	Infiltrating Ductal Carcinoma	LUMA	Alive	806
TCGA-BH-A0HI	705.407	0	1012.4	0	78	FEMALE	WHITE	Infiltrating Ductal Carcinoma	LUMA	Alive	620
TCGA-BH-A0HK	623.288	0	934.668	0	81	FEMALE	WHITE	Infiltrating Ductal Carcinoma	LUMA	Alive	178
TCGA-BH-A0HO	1080.03	0	1063.91	0	48	FEMALE	WHITE	Infiltrating Ductal Carcinoma	LUMA	Alive	76
TCGA-BH-A0HP	575.153	-1	1607.02	0	65	FEMALE	WHITE	Infiltrating Lobular Carcinoma	LUMA	Alive	414
TCGA-BH-A0HQ	1056.75	1	1287.99	1	56	FEMALE	WHITE	Infiltrating Ductal Carcinoma	LUMA	Alive	1121
TCGA-BH-A0HU	589.097	-1	1022.6	0	52	FEMALE	WHITE	Infiltrating Ductal Carcinoma	LUMB	Alive	392
TCGA-BH-A0HX	831.57	0	1222	-1	54	FEMALE	WHITE	Infiltrating Ductal Carcinoma	LUMA	Alive	829
TCGA-BH-A0HY	896.691	0	901.103	-1	60	FEMALE	WHITE	Infiltrating Ductal Carcinoma	LUMB	Alive	1545
TCGA-BH-A0RX	1305.94	0	1111.93	1	59	FEMALE	WHITE	Infiltrating Ductal Carcinoma	TNBC	Alive	170
TCGA-BH-A0W3	694.774	0	1038.65	-1	58	FEMALE	WHITE	Infiltrating Ductal Carcinoma	LUMB	Alive	728
TCGA-BH-A0W4	606.206	0	1381.82	0	46	FEMALE	WHITE	Infiltrating Ductal Carcinoma	LUMA	Alive	759
TCGA-BH-A0W5	785.557	0	1475.31	0	77	FEMALE	WHITE	Infiltrating Ductal Carcinoma	LUMA	Alive	1288
TCGA-BH-A0W7	910.509	-1	1586.41	2	49	FEMALE	WHITE	Infiltrating Ductal Carcinoma	LUMA	Alive	1363
TCGA-BH-A0WA	863.752	-1	2376.43	1	82	FEMALE	WHITE	[Not Available]	TNBC	Alive	701
TCGA-BH-A18F	698.705	-1	1539.43	0	50	FEMALE	WHITE	Infiltrating Ductal Carcinoma	LUMA	Alive	1001
TCGA-BH-A18G	1792.5	0	1018.75	0	81	FEMALE	WHITE	Infiltrating Ductal Carcinoma	TNBC	Alive	149
TCGA-BH-A18H	1727.23	-1	1356.63	0	63	FEMALE	WHITE	Infiltrating Ductal Carcinoma	LUMA	Alive	652
TCGA-BH-A18I	819.02	-1	1455.86	0	53	FEMALE	WHITE	Infiltrating Ductal Carcinoma	LUMA	Alive	1093
TCGA-BH-A18J	689.142	-1	1339.49	0	56	FEMALE	WHITE	Infiltrating Ductal Carcinoma	LUMA	Dead	612
TCGA-BH-A18K	885.347	0	1322.36	1	46	FEMALE	WHITE	Infiltrating Ductal Carcinoma	LUMA	Dead	2763
TCGA-BH-A18L	405.202	-1	1181.79	-1	50	FEMALE	WHITE	Infiltrating Ductal Carcinoma	LUMB	Dead	811
TCGA-BH-A18M	797.435	0	1478.8	0	39	FEMALE	WHITE	Infiltrating Ductal Carcinoma	LUMA	Dead	2207
TCGA-BH-A18N	756.692	1	1188.06	0	88	FEMALE	WHITE	Infiltrating Ductal Carcinoma	LUMA	Dead	1148
TCGA-BH-A18P	760.963	-1	1685.98	1	60	FEMALE	WHITE	Infiltrating Ductal Carcinoma	HER2	Dead	921
TCGA-BH-A18Q	757.386	-1	1490.2	1	56	FEMALE	WHITE	Infiltrating Ductal Carcinoma	TNBC	Dead	1692
TCGA-BH-A18R	852.6	0	1802.97	0	50	FEMALE	WHITE	Infiltrating Ductal Carcinoma	HER2	Dead	1142
TCGA-BH-A18S	995.772	1	1321.06	0	79	FEMALE	WHITE	Mucinous Carcinoma	LUMA	Dead	2009
TCGA-BH-A18T	1230.38	-1	2024.09	1	70	FEMALE	WHITE	Infiltrating Ductal Carcinoma	TNBC	Dead	224
TCGA-BH-A18U	607.105	-2	2239.89	1	72	FEMALE	WHITE	Infiltrating Ductal Carcinoma	LUMB	Dead	1563
TCGA-BH-A18V	1061.56	-1	2397.55	1	48	FEMALE	WHITE	Infiltrating Ductal Carcinoma	TNBC	Dead	1556
TCGA-BH-A1EN	1343.19	0	1988.75	1	78	FEMALE	WHITE	Infiltrating Ductal Carcinoma	HER2	Dead	2127
TCGA-BH-A1EO	548.764	-1	2291.19	1	68	FEMALE	WHITE	Mixed Histology (please specify)	LUMA	Dead	2798
TCGA-BH-A1ES	380.328	-1	1380.33	-1	35	FEMALE	WHITE	Infiltrating Ductal Carcinoma	LUMA	Dead	3462
TCGA-BH-A1ET	757.117	0	1517.68	0	55	FEMALE	WHITE	Infiltrating Ductal Carcinoma	LUMA	Dead	2520
TCGA-BH-A1EU	597.708	-1	1621.55	-1	83	FEMALE	WHITE	Infiltrating Ductal Carcinoma	LUMA	Dead	1286
TCGA-BH-A1EV	779.664	-1	1550.01	1	45	FEMALE	WHITE	Infiltrating Ductal Carcinoma	HER2	Dead	365
TCGA-BH-A1EW	1162.47	0	1498.2	0	38	FEMALE	WHITE	Infiltrating Ductal Carcinoma	LUMA	Dead	1694
TCGA-BH-A1EX	1099.69	1	1565.48	0	67	FEMALE	WHITE	Infiltrating Ductal Carcinoma	LUMA	Dead	1508
TCGA-BH-A1EY	545.625	-1	1527.65	-1	79	FEMALE	WHITE	Infiltrating Ductal Carcinoma	LUMA	Dead	538
TCGA-BH-A1F0	1265.08	0	1699.97	0	80	FEMALE	WHITE	Infiltrating Ductal Carcinoma	TNBC	Dead	785
TCGA-BH-A1F2	638.341	1	2804.36	1	53	FEMALE	WHITE	Infiltrating Ductal Carcinoma	LUMB	Dead	959
TCGA-BH-A1F5	479.366	0	1358.88	-1	62	FEMALE	WHITE	Infiltrating Ductal Carcinoma	LUMA	Dead	2712
TCGA-BH-A1F6	1384.25	-1	1454.03	0	51	FEMALE	WHITE	Infiltrating Ductal Carcinoma	TNBC	Dead	2965
TCGA-BH-A1F8	442.13	-1	2319.73	0	90	FEMALE	WHITE	Infiltrating Ductal Carcinoma	LUMB	Dead	763
TCGA-BH-A1FB	837.687	0	1643.67	0	60	FEMALE	WHITE	Infiltrating Ductal Carcinoma	LUMA	Dead	3669
TCGA-BH-A1FD	1263.92	-1	1523.2	0	68	FEMALE	WHITE	Infiltrating Ductal Carcinoma	LUMB	Dead	1009
TCGA-BH-A1FE	563.464	-1	2043.77	0	31	FEMALE	WHITE	Infiltrating Ductal Carcinoma	LUMA	Dead	2273
TCGA-BH-A1FG	1115.44	1	1826.29	0	88	FEMALE	WHITE	Infiltrating Ductal Carcinoma	LUMA	Dead	3736
TCGA-BH-A1FH	687.05	-1	1510.64	0	47	FEMALE	WHITE	Infiltrating Ductal Carcinoma	LUMA	Dead	1034
TCGA-BH-A1FJ	525.735	1	1300.43	0	66	FEMALE	WHITE	Infiltrating Ductal Carcinoma	LUMB	Dead	1927
TCGA-BH-A1FL	712.337	0	1323.38	0	69	FEMALE	WHITE	Infiltrating Ductal Carcinoma	LUMA	Dead	1673
TCGA-BH-A1FM	275.487	-1	1676.12	-1	44	FEMALE	WHITE	Infiltrating Ductal Carcinoma	LUMB	Dead	1388
TCGA-BH-A1FN	1124.17	1	1356.1	-1	34	FEMALE	WHITE	Infiltrating Ductal Carcinoma	LUMB	Dead	2192
TCGA-BH-A1FR	766.03	0	1431.72	0	73	FEMALE	WHITE	Other, specify	LUMA	Dead	1642
TCGA-BH-A1FU	826.332	0	2275.44	0	44	FEMALE	WHITE	Infiltrating Ductal Carcinoma	NORMAL	Dead	1688
TCGA-BH-A201	1142.46	0	1636.52	0	64	FEMALE	WHITE	Infiltrating Ductal Carcinoma	LUMA	Alive	856
TCGA-BH-A202	586.857	-1	1580.08	0	60	FEMALE	WHITE	Infiltrating Ductal Carcinoma	LUMB	Alive	795
TCGA-BH-A203	1036.74	-1	1108.8	-1	78	FEMALE	WHITE	Infiltrating Ductal Carcinoma	HER2	Dead	1174
TCGA-BH-A204	327.545	1	2238.57	0	80	FEMALE	WHITE	Infiltrating Ductal Carcinoma	LUMB	Dead	2534
TCGA-BH-A208	977.013	-1	1713.48	1	48	FEMALE	WHITE	Infiltrating Ductal Carcinoma	NORMAL	Dead	1759
TCGA-BH-A28O	1002.11	0	1289.68	0	50	FEMALE	WHITE	Infiltrating Lobular Carcinoma	NORMAL	Alive	1120
TCGA-BH-A28Q	905.18	0	1379.36	0	46	FEMALE	WHITE	Infiltrating Lobular Carcinoma	LUMA	Alive	1119
TCGA-BH-A2L8	955.511	0	1094.06	0	45	FEMALE	WHITE	Infiltrating Lobular Carcinoma	LUMA	Alive	612
TCGA-BH-A6R9	1397.39	0	1520.77	0	61	FEMALE	WHITE	Metaplastic Carcinoma	NORMAL	Alive	160
TCGA-BH-A8FY	711.136	0	668.423	0	87	FEMALE	WHITE	Infiltrating Lobular Carcinoma	LUMA	Dead	295
TCGA-BH-A8FZ	2363.54	0	1101.75	-1	58	FEMALE	WHITE	Infiltrating Lobular Carcinoma	NORMAL	Alive	574
TCGA-BH-A8G0	871.543	0	1226.97	0	54	FEMALE	WHITE	Infiltrating Lobular Carcinoma	LUMA	Alive	662
TCGA-BH-AB28	907.134	0	1076.13	0	53	FEMALE	WHITE	Infiltrating Lobular Carcinoma	LUMA	Alive	287
TCGA-C8-A133	1234.94	0	943.948	0	65	FEMALE	WHITE	Other, specify	LUMA	Alive	0
TCGA-D8-A13Y	582.257	-1	915.914	-1	52	FEMALE	WHITE	Infiltrating Ductal Carcinoma	LUMB	Alive	1728
TCGA-D8-A13Z	1229.69	-1	2720.65	1	51	FEMALE	WHITE	Infiltrating Ductal Carcinoma	HER2	Alive	635
TCGA-D8-A140	386.97	0	794.348	-1	62	FEMALE	WHITE	Infiltrating Ductal Carcinoma	LUMA	Alive	403
TCGA-D8-A141	881.212	0	1295.1	0	40	FEMALE	WHITE	Infiltrating Ductal Carcinoma	LUMA	Alive	626
TCGA-D8-A142	1288.45	0	4130.41	2	74	FEMALE	WHITE	Infiltrating Ductal Carcinoma	TNBC	Alive	425
TCGA-D8-A143	2438.85	1	1738.25	1	51	FEMALE	WHITE	Infiltrating Ductal Carcinoma	TNBC	Alive	431
TCGA-D8-A145	539.144	-1	1600.89	-1	80	FEMALE	WHITE	Infiltrating Ductal Carcinoma	LUMA	Alive	410
TCGA-D8-A147	404.19	-1	2368.45	1	45	FEMALE	WHITE	Infiltrating Ductal Carcinoma	TNBC	Alive	584
TCGA-D8-A1J8	561.216	-1	2355.25	1	77	FEMALE	WHITE	Infiltrating Ductal Carcinoma	LUMB	Alive	431
TCGA-D8-A1J9	576.138	-1	1892.2	0	48	FEMALE	WHITE	Infiltrating Ductal Carcinoma	LUMB	Alive	532
TCGA-D8-A1JA	806.067	0	2077.19	0	60	FEMALE	WHITE	Infiltrating Ductal Carcinoma	HER2	Alive	502
TCGA-D8-A1JB	886.942	1	1704.28	0	54	FEMALE	WHITE	Infiltrating Ductal Carcinoma	LUMA	Alive	1688
TCGA-D8-A1JC	1278.77	1	1484.37	-1	59	FEMALE	WHITE	Infiltrating Ductal Carcinoma	LUMB	Alive	480
TCGA-D8-A1JD	857.23	0	1898.76	0	41	FEMALE	WHITE	Infiltrating Ductal Carcinoma	LUMB	Alive	552
TCGA-D8-A1JE	421.217	-1	1379.98	-1	62	FEMALE	WHITE	Infiltrating Ductal Carcinoma	LUMB	Alive	575
TCGA-D8-A1JF	604.102	1	2068.56	0	79	FEMALE	WHITE	Infiltrating Ductal Carcinoma	HER2	Alive	366
TCGA-D8-A1JG	588.061	-1	2993.34	1	62	FEMALE	WHITE	Infiltrating Ductal Carcinoma	HER2	Alive	1612
TCGA-D8-A1JH	682.088	0	1708.79	0	56	FEMALE	WHITE	Infiltrating Ductal Carcinoma	LUMA	Alive	426
TCGA-D8-A1JI	632.702	0	1370.34	0	54	FEMALE	WHITE	Infiltrating Ductal Carcinoma	LUMB	Alive	577
TCGA-D8-A1JJ	514.744	-1	1783.37	1	54	FEMALE	WHITE	Infiltrating Ductal Carcinoma	LUMB	Alive	611
TCGA-D8-A1JK	1630.97	-1	1600.48	0	90	FEMALE	WHITE	Infiltrating Ductal Carcinoma	TNBC	Alive	612
TCGA-D8-A1JL	1353.05	0	1922.63	1	72	FEMALE	WHITE	Infiltrating Ductal Carcinoma	TNBC	Alive	611
TCGA-D8-A1JM	2529.05	0	897.859	-1	59	FEMALE	WHITE	Infiltrating Ductal Carcinoma	TNBC	Alive	590
TCGA-D8-A1JN	756.005	-1	1229.09	0	80	FEMALE	WHITE	Infiltrating Lobular Carcinoma	LUMA	Alive	620
TCGA-D8-A1JP	574.928	-1	1596.54	0	73	FEMALE	WHITE	Infiltrating Ductal Carcinoma	LUMA	Alive	639
TCGA-D8-A1JS	1227.79	0	970.275	0	77	FEMALE	WHITE	Other, specify	LUMA	Alive	371
TCGA-D8-A1JT	744.789	1	2126.86	0	70	FEMALE	WHITE	Other, specify	LUMB	Alive	405
TCGA-D8-A1JU	741.018	0	1674.79	0	51	FEMALE	WHITE	Infiltrating Ductal Carcinoma	LUMA	Alive	447
TCGA-D8-A1X5	459.911	-1	1483.58	0	81	FEMALE	WHITE	Infiltrating Ductal Carcinoma	LUMB	Alive	565
TCGA-D8-A1X6	778.372	0	1386.07	0	80	FEMALE	WHITE	Infiltrating Ductal Carcinoma	LUMB	Alive	541
TCGA-D8-A1X7	581.524	0	1407.66	0	40	FEMALE	WHITE	Other, specify	LUMB	Alive	509
TCGA-D8-A1X8	629.267	0	1611.2	0	62	FEMALE	WHITE	Infiltrating Lobular Carcinoma	LUMA	Alive	783
TCGA-D8-A1X9	602.251	0	1746.55	0	66	FEMALE	WHITE	Infiltrating Ductal Carcinoma	LUMA	Alive	727
TCGA-D8-A1XA	816.633	0	1051.12	-1	64	FEMALE	WHITE	Infiltrating Ductal Carcinoma	LUMA	Alive	839
TCGA-D8-A1XB	599.451	1	1126.2	-1	62	FEMALE	WHITE	Infiltrating Ductal Carcinoma	LUMA	Alive	552
TCGA-D8-A1XC	665.19	0	1395.48	0	85	FEMALE	WHITE	Mucinous Carcinoma	LUMA	Dead	377
TCGA-D8-A1XD	724.172	0	1661.31	0	36	FEMALE	WHITE	Infiltrating Ductal Carcinoma	LUMA	Alive	522
TCGA-D8-A1XF	365.86	-1	1573.16	0	45	FEMALE	WHITE	Infiltrating Ductal Carcinoma	LUMB	Alive	463
TCGA-D8-A1XG	551.928	0	1360.68	0	86	FEMALE	WHITE	Infiltrating Ductal Carcinoma	LUMA	Alive	448
TCGA-D8-A1XJ	1004.91	-1	2079.57	1	76	FEMALE	WHITE	Other, specify	HER2	Alive	664
TCGA-D8-A1XK	1931.17	-1	1920.58	1	55	FEMALE	WHITE	Infiltrating Ductal Carcinoma	TNBC	Alive	441
TCGA-D8-A1XL	836.496	-1	1751.37	1	34	FEMALE	WHITE	Infiltrating Ductal Carcinoma	LUMB	Alive	606
TCGA-D8-A1XM	815.928	1	1721.52	0	57	FEMALE	WHITE	Infiltrating Ductal Carcinoma	LUMA	Alive	538
TCGA-D8-A1XO	616.436	0	1649.13	0	56	FEMALE	WHITE	Infiltrating Lobular Carcinoma	LUMA	Alive	1682
TCGA-D8-A1XQ	1264.83	-1	2778.96	1	69	FEMALE	WHITE	Infiltrating Ductal Carcinoma	TNBC	Alive	499
TCGA-D8-A1XR	715.795	0	1210.08	0	56	FEMALE	WHITE	Infiltrating Ductal Carcinoma	LUMB	Alive	482
TCGA-D8-A1XT	657.186	-1	1767.05	0	61	FEMALE	WHITE	Infiltrating Ductal Carcinoma	HER2	Alive	506
TCGA-D8-A1XU	721.124	-1	1462.6	-1	56	FEMALE	WHITE	Infiltrating Ductal Carcinoma	LUMA	Alive	395
TCGA-D8-A1XV	539.413	0	1184.96	0	84	FEMALE	WHITE	Mucinous Carcinoma	LUMA	Alive	461
TCGA-D8-A1XW	1011.21	0	2063.95	1	53	FEMALE	WHITE	Infiltrating Ductal Carcinoma	NORMAL	Alive	1309
TCGA-D8-A1XY	780.238	1	1539.66	1	74	FEMALE	WHITE	Infiltrating Ductal Carcinoma	LUMA	Alive	503
TCGA-D8-A1XZ	3275.02	2	2019.9	1	81	FEMALE	WHITE	Infiltrating Ductal Carcinoma	LUMB	Alive	466
TCGA-D8-A1Y0	436.254	-1	1801.37	0	65	FEMALE	WHITE	Infiltrating Ductal Carcinoma	LUMA	Alive	472
TCGA-D8-A1Y1	834.522	0	1283.67	-1	80	FEMALE	WHITE	Infiltrating Ductal Carcinoma	LUMB	Dead	302
TCGA-D8-A1Y2	1169.04	1	1579.56	0	71	FEMALE	WHITE	Infiltrating Ductal Carcinoma	LUMB	Alive	433
TCGA-D8-A1Y3	597.081	-1	2006.15	1	61	FEMALE	WHITE	Infiltrating Ductal Carcinoma	LUMB	Alive	430
TCGA-D8-A27E	1064.29	0	1277.09	0	66	FEMALE	WHITE	Other, specify	LUMA	Alive	530
TCGA-D8-A27F	932.475	-1	3235.23	1	40	FEMALE	WHITE	Infiltrating Ductal Carcinoma	TNBC	Alive	488
TCGA-D8-A27G	1932.02	2	1562.64	0	75	FEMALE	WHITE	Infiltrating Lobular Carcinoma	LUMA	Alive	409
TCGA-D8-A27H	556.706	-1	1923.14	1	72	FEMALE	WHITE	Infiltrating Ductal Carcinoma	TNBC	Alive	397
TCGA-D8-A27I	763.917	0	1537.45	0	58	FEMALE	WHITE	Infiltrating Lobular Carcinoma	LUMA	Alive	439
TCGA-D8-A27K	792.576	0	1603.06	0	47	FEMALE	WHITE	Infiltrating Ductal Carcinoma	LUMA	Alive	1461
TCGA-D8-A27L	913.079	0	1564.58	0	49	FEMALE	WHITE	Infiltrating Ductal Carcinoma	LUMA	Alive	499
TCGA-D8-A27M	785.406	-1	1697.04	0	59	FEMALE	WHITE	Infiltrating Ductal Carcinoma	TNBC	Alive	410
TCGA-D8-A27N	2662.91	1	1671.11	0	36	FEMALE	WHITE	Infiltrating Ductal Carcinoma	LUMB	Alive	519
TCGA-D8-A27P	771.08	0	1404.26	0	64	FEMALE	WHITE	Infiltrating Ductal Carcinoma	LUMA	Alive	49
TCGA-D8-A27R	797.097	-1	1903.61	1	41	FEMALE	WHITE	Infiltrating Ductal Carcinoma	LUMB	Alive	307
TCGA-D8-A27T	768.76	2	1328.25	0	53	FEMALE	WHITE	Infiltrating Lobular Carcinoma	LUMA	Alive	398
TCGA-D8-A27V	686.661	0	1897.23	1	62	FEMALE	WHITE	Infiltrating Lobular Carcinoma	LUMA	Alive	381
TCGA-D8-A27W	810.307	0	884.172	-1	55	FEMALE	WHITE	Mucinous Carcinoma	LUMB	Alive	373
TCGA-D8-A3Z5	1070.36	0	1059.82	0	54	FEMALE	WHITE	Infiltrating Lobular Carcinoma	LUMA	Alive	1015
TCGA-D8-A3Z6	1136.96	0	1075.36	0	56	FEMALE	WHITE	Infiltrating Lobular Carcinoma	LUMA	Alive	563
TCGA-D8-A4Z1	1074.79	0	1259.57	0	68	FEMALE	WHITE	Infiltrating Lobular Carcinoma	LUMA	Alive	659
TCGA-D8-A73U	915.151	-1	1421.56	0	88	FEMALE	WHITE	Infiltrating Lobular Carcinoma	LUMA	Alive	492
TCGA-D8-A73W	773.829	-1	1279.26	0	79	FEMALE	WHITE	Mucinous Carcinoma	LUMA	Dead	385
TCGA-D8-A73X	672.062	0	1003.52	0	53	FEMALE	WHITE	Other, specify	LUMA	Alive	767
TCGA-E2-A105	363.462	-1	1207.37	0	79	FEMALE	WHITE	Infiltrating Ductal Carcinoma	LUMA	Alive	1308
TCGA-E2-A107	1210.91	1	798.016	-1	54	FEMALE	WHITE	Infiltrating Lobular Carcinoma	LUMA	Alive	1047
TCGA-E2-A108	1266.46	0	1719.75	0	64	FEMALE	WHITE	Infiltrating Ductal Carcinoma	NORMAL	Alive	837
TCGA-E2-A109	1339.18	1	1344.11	0	64	FEMALE	WHITE	Infiltrating Ductal Carcinoma	LUMB	Alive	1417
TCGA-E2-A10A	720.605	0	1452.53	0	41	FEMALE	WHITE	Infiltrating Ductal Carcinoma	LUMA	Alive	1229
TCGA-E2-A10B	835.277	0	1211.95	0	67	FEMALE	WHITE	Infiltrating Ductal Carcinoma	LUMA	Alive	1141
TCGA-E2-A10C	873.93	1	572.312	-1	54	FEMALE	WHITE	Infiltrating Ductal Carcinoma	LUMB	Alive	1220
TCGA-E2-A10E	775.76	0	1429.69	0	64	FEMALE	WHITE	Infiltrating Ductal Carcinoma	LUMA	Alive	865
TCGA-E2-A10F	771.955	0	1464.35	0	47	FEMALE	WHITE	Infiltrating Lobular Carcinoma	LUMA	Alive	878
TCGA-E2-A14N	1393.34	0	951.082	0	37	FEMALE	WHITE	Infiltrating Ductal Carcinoma	TNBC	Alive	1434
TCGA-E2-A14O	920.24	1	945.892	0	76	FEMALE	WHITE	Infiltrating Ductal Carcinoma	LUMB	Alive	1359
TCGA-E2-A14P	2472.17	1	969.964	0	79	FEMALE	WHITE	Infiltrating Ductal Carcinoma	HER2	Alive	1246
TCGA-E2-A14Q	662.795	-1	1189.18	0	50	FEMALE	WHITE	Infiltrating Ductal Carcinoma	LUMA	Alive	1163
TCGA-E2-A14R	932.248	-1	920.326	0	62	FEMALE	WHITE	Infiltrating Ductal Carcinoma	TNBC	Alive	1174
TCGA-E2-A14S	692.654	0	1167.88	0	65	FEMALE	WHITE	Infiltrating Ductal Carcinoma	LUMB	Alive	1009
TCGA-E2-A14T	650.517	-1	1285.52	0	52	FEMALE	WHITE	Infiltrating Ductal Carcinoma	LUMA	Alive	2311
TCGA-E2-A14U	1163.07	0	1157.77	0	74	FEMALE	WHITE	Infiltrating Lobular Carcinoma	LUMA	Alive	1318
TCGA-E2-A14V	509.93	-1	1662.96	0	53	FEMALE	WHITE	Infiltrating Ductal Carcinoma	HER2	Alive	1042
TCGA-E2-A14Y	5452.09	2	1537.85	0	35	FEMALE	WHITE	Infiltrating Ductal Carcinoma	TNBC	Alive	2109
TCGA-E2-A14Z	815.247	-1	1684.75	1	64	FEMALE	WHITE	Infiltrating Ductal Carcinoma	LUMA	Dead	563
TCGA-E2-A150	1631.32	-1	1852.69	1	48	FEMALE	WHITE	Infiltrating Ductal Carcinoma	TNBC	Alive	1935
TCGA-E2-A152	777.283	-1	1434.25	-1	56	FEMALE	WHITE	Infiltrating Ductal Carcinoma	HER2	Alive	2128
TCGA-E2-A153	756.396	-1	1077.86	-1	51	FEMALE	WHITE	Infiltrating Ductal Carcinoma	LUMA	Alive	707
TCGA-E2-A154	801.69	0	1221.17	0	68	FEMALE	WHITE	Infiltrating Ductal Carcinoma	LUMA	Alive	591
TCGA-E2-A155	247.179	-1	1017.78	-1	58	FEMALE	WHITE	Infiltrating Ductal Carcinoma	LUMB	Alive	640
TCGA-E2-A156	633.166	0	1129.22	0	61	FEMALE	WHITE	Infiltrating Ductal Carcinoma	LUMA	Alive	726
TCGA-E2-A158	582.298	-1	1475.79	0	43	FEMALE	WHITE	Infiltrating Ductal Carcinoma	TNBC	Alive	450
TCGA-E2-A159	1336.19	-1	2135.19	1	50	FEMALE	WHITE	Infiltrating Ductal Carcinoma	TNBC	Alive	762
TCGA-E2-A15A	886.187	1	2069.9	1	45	FEMALE	WHITE	Infiltrating Ductal Carcinoma	LUMB	Alive	710
TCGA-E2-A15C	678.4	0	1633.6	0	61	FEMALE	WHITE	Infiltrating Ductal Carcinoma	LUMA	Alive	694
TCGA-E2-A15D	771.979	0	1299.12	0	47	FEMALE	WHITE	Infiltrating Ductal Carcinoma	LUMA	Alive	526
TCGA-E2-A15E	829.453	1	1330.47	-1	40	FEMALE	WHITE	Infiltrating Ductal Carcinoma	LUMA	Alive	630
TCGA-E2-A15F	1327.56	0	1027.57	-1	64	FEMALE	WHITE	Infiltrating Ductal Carcinoma	LUMA	Alive	658
TCGA-E2-A15G	571.312	-1	1158.61	0	76	FEMALE	WHITE	Mixed Histology (please specify)	LUMA	Alive	554
TCGA-E2-A15H	707.445	-1	1284.1	-1	38	FEMALE	WHITE	Infiltrating Ductal Carcinoma	LUMA	Alive	393
TCGA-E2-A15I	519.626	0	1333.86	0	44	FEMALE	WHITE	Infiltrating Ductal Carcinoma	LUMA	Alive	1692
TCGA-E2-A15J	858.657	0	1054.06	0	51	FEMALE	WHITE	Infiltrating Ductal Carcinoma	LUMA	Alive	1640
TCGA-E2-A15K	877.619	0	989.762	0	58	FEMALE	WHITE	Infiltrating Ductal Carcinoma	LUMB	Alive	275
TCGA-E2-A15M	541.048	-1	1921.82	1	66	FEMALE	WHITE	Infiltrating Lobular Carcinoma	LUMA	Dead	336
TCGA-E2-A15P	736.595	0	1723.1	0	61	FEMALE	WHITE	Infiltrating Ductal Carcinoma	LUMA	Alive	595
TCGA-E2-A15R	397.901	0	1817.32	0	64	FEMALE	WHITE	Infiltrating Ductal Carcinoma	LUMA	Alive	1732
TCGA-E2-A15S	538.318	-1	2899.5	1	34	FEMALE	WHITE	Infiltrating Ductal Carcinoma	LUMB	Alive	428
TCGA-E2-A15T	339.111	-1	2056.62	0	65	FEMALE	WHITE	Infiltrating Ductal Carcinoma	LUMB	Alive	1563
TCGA-E2-A1AZ	974.494	-1	1378.84	-1	63	FEMALE	WHITE	Infiltrating Ductal Carcinoma	TNBC	Alive	2329
TCGA-E2-A1B0	1087.63	-1	1740.25	1	50	FEMALE	WHITE	Infiltrating Ductal Carcinoma	HER2	Alive	1631
TCGA-E2-A1B1	878.249	-1	1928.02	0	45	FEMALE	WHITE	Infiltrating Ductal Carcinoma	LUMA	Alive	2653
TCGA-E2-A1B4	967.814	0	821.625	0	74	FEMALE	WHITE	Infiltrating Ductal Carcinoma	LUMA	Dead	1004
TCGA-E2-A1B5	880.068	-1	1137	0	46	FEMALE	WHITE	Infiltrating Lobular Carcinoma	LUMA	Alive	984
TCGA-E2-A1B6	1186.3	0	1044.62	0	44	FEMALE	WHITE	Infiltrating Ductal Carcinoma	TNBC	Alive	867
TCGA-E2-A1BD	707.096	0	834.172	-1	53	FEMALE	WHITE	Infiltrating Ductal Carcinoma	LUMA	Alive	1133
TCGA-E2-A1IE	332.607	-1	1282.59	0	61	FEMALE	WHITE	Infiltrating Ductal Carcinoma	LUMA	Alive	2362
TCGA-E2-A1IF	1288.93	0	965.741	0	74	FEMALE	WHITE	Infiltrating Ductal Carcinoma	LUMA	Alive	1138
TCGA-E2-A1IG	477.873	-1	1259.03	0	45	FEMALE	WHITE	Infiltrating Ductal Carcinoma	LUMA	Alive	2140
TCGA-E2-A1IH	630.301	-1	1617.59	0	80	FEMALE	WHITE	Infiltrating Lobular Carcinoma	LUMA	Alive	1026
TCGA-E2-A1II	988.008	-1	1597.5	1	51	FEMALE	WHITE	Infiltrating Ductal Carcinoma	TNBC	Alive	1025
TCGA-E2-A1IJ	660.244	-1	1246.63	0	57	FEMALE	WHITE	Infiltrating Lobular Carcinoma	LUMA	Alive	865
TCGA-E2-A1IK	1197.78	0	841.111	0	71	FEMALE	WHITE	Infiltrating Ductal Carcinoma	LUMA	Alive	1800
TCGA-E2-A1IL	765.333	0	1861.29	1	78	FEMALE	WHITE	Infiltrating Lobular Carcinoma	LUMA	Alive	118
TCGA-E2-A1IN	381.744	-2	1493.19	1	60	FEMALE	WHITE	Infiltrating Ductal Carcinoma	LUMA	Alive	675
TCGA-E2-A1IO	493.883	-1	1147.94	-1	37	FEMALE	WHITE	Infiltrating Ductal Carcinoma	LUMA	Alive	1855
TCGA-E2-A1IU	878.109	0	1424.87	0	60	FEMALE	WHITE	Infiltrating Ductal Carcinoma	LUMA	Alive	337
TCGA-E2-A1L6	892.248	0	1245.03	0	44	FEMALE	WHITE	Infiltrating Ductal Carcinoma	LUMA	Alive	1648
TCGA-E2-A1L7	409.074	-1	779.813	-1	40	FEMALE	WHITE	Infiltrating Ductal Carcinoma	LUMB	Alive	1836
TCGA-E2-A1L9	886.823	0	1226.62	0	40	FEMALE	WHITE	Infiltrating Ductal Carcinoma	LUMA	Alive	598
TCGA-E2-A1LE	1206.73	-1	1109.35	0	71	FEMALE	WHITE	Infiltrating Ductal Carcinoma	HER2	Dead	879
TCGA-E2-A1LH	1282.65	0	764.808	0	59	FEMALE	WHITE	Infiltrating Ductal Carcinoma	TNBC	Alive	3247
TCGA-E2-A1LI	903.846	-1	3080.53	1	57	FEMALE	WHITE	Infiltrating Ductal Carcinoma	TNBC	Alive	3121
TCGA-E2-A3DX	759.117	0	1087.98	0	43	FEMALE	WHITE	Infiltrating Lobular Carcinoma	LUMA	Alive	1325
TCGA-E9-A1N3	811.045	0	1259.31	0	70	FEMALE	WHITE	Mixed Histology (please specify)	LUMA	Alive	1059
TCGA-E9-A1N4	2549.64	0	1549.91	0	41	FEMALE	WHITE	Mixed Histology (please specify)	LUMA	Alive	1000
TCGA-E9-A1N5	712.794	-1	1526.64	0	45	FEMALE	WHITE	Mixed Histology (please specify)	LUMA	Alive	1120
TCGA-E9-A1N6	821.853	-1	1575.3	-1	52	FEMALE	WHITE	Infiltrating Ductal Carcinoma	LUMB	Dead	678
TCGA-E9-A1N8	930.014	-1	1307.19	1	48	FEMALE	WHITE	Infiltrating Ductal Carcinoma	TNBC	Alive	1039
TCGA-E9-A1N9	1398.11	2	1613.62	1	58	FEMALE	WHITE	Mixed Histology (please specify)	TNBC	Alive	1101
TCGA-E9-A1NA	704.391	0	809.524	-1	58	FEMALE	WHITE	Mixed Histology (please specify)	LUMB	Alive	1112
TCGA-E9-A1NC	1131.19	-1	1790.98	1	61	FEMALE	WHITE	Mixed Histology (please specify)	TNBC	Alive	1203
TCGA-E9-A1ND	1251.87	-1	1997.49	1	75	FEMALE	WHITE	Infiltrating Ductal Carcinoma	TNBC	Alive	1266
TCGA-E9-A1NE	580.163	0	1921.51	-1	28	FEMALE	WHITE	Infiltrating Ductal Carcinoma	LUMA	Alive	1088
TCGA-E9-A1NF	1201.16	-1	1078.56	-1	60	FEMALE	WHITE	Mixed Histology (please specify)	LUMB	Dead	1072
TCGA-E9-A1NG	854.75	0	1644.03	0	62	FEMALE	WHITE	Infiltrating Ductal Carcinoma	LUMA	Dead	786
TCGA-E9-A1NH	754.025	-1	1272.36	0	71	FEMALE	WHITE	Infiltrating Ductal Carcinoma	LUMA	Alive	576
TCGA-E9-A1NI	743.483	0	935.871	0	51	FEMALE	WHITE	Mixed Histology (please specify)	LUMB	Alive	300
TCGA-E9-A1QZ	830.629	-1	2112.73	-1	61	FEMALE	WHITE	Infiltrating Ductal Carcinoma	LUMA	Alive	755
TCGA-E9-A1R0	593.919	-1	1873.56	0	58	FEMALE	WHITE	Infiltrating Ductal Carcinoma	LUMA	Alive	860
TCGA-E9-A1R2	800.368	0	1297.15	0	51	FEMALE	WHITE	Infiltrating Ductal Carcinoma	LUMA	Alive	1063
TCGA-E9-A1R3	1027.56	0	1258.27	0	70	FEMALE	WHITE	Infiltrating Ductal Carcinoma	LUMA	Alive	78
TCGA-E9-A1R4	593.736	-1	2233.86	0	66	FEMALE	WHITE	Infiltrating Ductal Carcinoma	LUMB	Alive	186
TCGA-E9-A1R5	328.659	1	1484.87	0	63	FEMALE	WHITE	Infiltrating Ductal Carcinoma	LUMA	Alive	92
TCGA-E9-A1R6	920.934	1	1140.95	-1	63	FEMALE	WHITE	Infiltrating Ductal Carcinoma	LUMA	Alive	339
TCGA-E9-A1R7	276.566	-1	1721.32	0	64	FEMALE	WHITE	Infiltrating Ductal Carcinoma	LUMB	Alive	1467
TCGA-E9-A1RA	886.535	-1	1056.5	-1	48	FEMALE	WHITE	Infiltrating Ductal Carcinoma	LUMA	Alive	1369
TCGA-E9-A1RB	1009.37	-1	1174.82	-1	40	FEMALE	WHITE	Infiltrating Ductal Carcinoma	LUMB	Dead	976
TCGA-E9-A1RC	711.062	0	1294.89	0	56	FEMALE	WHITE	Mixed Histology (please specify)	LUMA	Alive	1224
TCGA-E9-A1RD	569.628	0	1306.49	0	67	FEMALE	WHITE	Infiltrating Ductal Carcinoma	LUMA	Alive	34
TCGA-E9-A1RE	801.634	1	1766.92	0	74	FEMALE	WHITE	Infiltrating Ductal Carcinoma	LUMB	Alive	1419
TCGA-E9-A1RF	600.386	-1	1362.9	1	68	FEMALE	WHITE	Infiltrating Ductal Carcinoma	LUMA	Alive	200
TCGA-E9-A1RG	1364.14	-1	973.198	0	62	FEMALE	WHITE	Infiltrating Ductal Carcinoma	LUMB	Alive	647
TCGA-E9-A1RH	678.455	1	1953.53	0	63	FEMALE	WHITE	Infiltrating Ductal Carcinoma	HER2	Alive	1417
TCGA-E9-A1RI	396.078	-1	1554.41	0	43	FEMALE	WHITE	Mixed Histology (please specify)	LUMA	Alive	1449
TCGA-E9-A226	1130.07	1	1781.06	0	45	FEMALE	WHITE	Infiltrating Ductal Carcinoma	LUMB	Dead	1048
TCGA-E9-A227	825.91	0	1120.45	0	42	FEMALE	WHITE	Infiltrating Ductal Carcinoma	LUMA	Alive	975
TCGA-E9-A228	342.001	-1	1338.33	0	58	FEMALE	WHITE	Infiltrating Ductal Carcinoma	LUMB	Alive	1285
TCGA-E9-A229	388.95	-1	1550.03	0	37	FEMALE	WHITE	Infiltrating Ductal Carcinoma	LUMA	Alive	1148
TCGA-E9-A22A	658.112	-1	1548.38	0	74	FEMALE	WHITE	Infiltrating Ductal Carcinoma	LUMB	Alive	1189
TCGA-E9-A22B	678.076	-1	1073.81	0	71	FEMALE	WHITE	Mixed Histology (please specify)	LUMA	Alive	1167
TCGA-E9-A22D	754.834	-1	1276.62	0	38	FEMALE	WHITE	Infiltrating Ductal Carcinoma	LUMB	Alive	1248
TCGA-E9-A22E	651.441	-1	1434.29	0	56	FEMALE	WHITE	Infiltrating Ductal Carcinoma	LUMB	Alive	1269
TCGA-E9-A22G	470.808	-1	2111.17	1	47	FEMALE	WHITE	Infiltrating Ductal Carcinoma	TNBC	Alive	1239
TCGA-E9-A22H	572.653	0	1658.7	0	42	FEMALE	WHITE	Infiltrating Ductal Carcinoma	LUMB	Alive	1232
TCGA-E9-A243	1290.78	0	1586.7	0	52	FEMALE	WHITE	Infiltrating Ductal Carcinoma	TNBC	Alive	612
TCGA-E9-A244	968.964	-1	1287.16	1	54	FEMALE	WHITE	Infiltrating Ductal Carcinoma	TNBC	Alive	21
TCGA-E9-A245	911.08	0	1038.81	0	47	FEMALE	WHITE	Infiltrating Ductal Carcinoma	LUMA	Alive	26
TCGA-E9-A247	606.622	0	1062.74	0	59	FEMALE	WHITE	Infiltrating Ductal Carcinoma	LUMA	Alive	1186
TCGA-E9-A248	749.757	0	1790.22	0	51	FEMALE	WHITE	Infiltrating Ductal Carcinoma	HER2	Alive	59
TCGA-E9-A249	785.653	0	1076.02	-1	45	FEMALE	WHITE	Infiltrating Ductal Carcinoma	LUMB	Alive	217
TCGA-E9-A24A	581.284	0	1601.68	0	69	FEMALE	WHITE	Infiltrating Ductal Carcinoma	LUMA	Alive	747
TCGA-E9-A295	785.706	-1	1314.5	1	71	FEMALE	WHITE	Infiltrating Lobular Carcinoma	LUMA	Alive	375
TCGA-E9-A2JS	555.67	-1	1111	-1	72	FEMALE	WHITE	Infiltrating Lobular Carcinoma	LUMB	Dead	904
TCGA-E9-A2JT	1079.32	0	1638.1	0	63	FEMALE	WHITE	Infiltrating Lobular Carcinoma	LUMA	Alive	288
TCGA-E9-A3HO	853.423	0	948.341	1	49	FEMALE	WHITE	Infiltrating Lobular Carcinoma	LUMB	Alive	1158
TCGA-E9-A3Q9	871.287	0	1114.03	0	78	FEMALE	WHITE	Infiltrating Lobular Carcinoma	LUMA	Alive	1001
TCGA-E9-A3QA	2129.36	-1	1646.82	1	33	FEMALE	WHITE	Medullary Carcinoma	TNBC	Alive	918
TCGA-E9-A3X8	1244.89	-1	692.583	-1	48	FEMALE	WHITE	Infiltrating Lobular Carcinoma	LUMA	Alive	926
TCGA-E9-A54X	503.972	-1	966.236	0	85	FEMALE	WHITE	Mucinous Carcinoma	LUMB	Alive	727
TCGA-E9-A54Y	970.379	1	1062.2	1	63	FEMALE	WHITE	Infiltrating Lobular Carcinoma	LUMB	Alive	725
TCGA-E9-A5FK	1506.57	0	1091.43	0	60	FEMALE	WHITE	Infiltrating Lobular Carcinoma	LUMA	Alive	812
TCGA-E9-A5FL	1653.1	1	952.196	0	65	FEMALE	WHITE	Metaplastic Carcinoma	TNBC	Alive	24
TCGA-E9-A5UO	1633.02	2	759.509	-1	41	FEMALE	WHITE	Mucinous Carcinoma	LUMB	Alive	785
TCGA-E9-A5UP	682.109	-1	970.447	-1	63	FEMALE	WHITE	Other, specify	LUMA	Alive	803
TCGA-E9-A6HE	1056.37	-1	870.782	0	45	FEMALE	WHITE	Infiltrating Lobular Carcinoma	LUMA	Alive	847
TCGA-EW-A1IW	886.034	0	1771.25	0	80	FEMALE	WHITE	Infiltrating Lobular Carcinoma	LUMA	Alive	371
TCGA-EW-A1IZ	1043.29	0	1017.21	0	53	FEMALE	WHITE	Infiltrating Ductal Carcinoma	LUMA	Alive	554
TCGA-EW-A1J1	302.855	-1	1209.82	-1	38	FEMALE	WHITE	Infiltrating Ductal Carcinoma	LUMA	Alive	575
TCGA-EW-A1J3	524.437	-1	1337.18	0	61	FEMALE	WHITE	Infiltrating Lobular Carcinoma	LUMA	Alive	504
TCGA-EW-A1J5	875.526	1	1770.53	0	59	FEMALE	WHITE	Infiltrating Lobular Carcinoma	LUMA	Alive	477
TCGA-EW-A1J6	1139.36	1	1201.14	1	70	FEMALE	WHITE	Infiltrating Ductal Carcinoma	LUMB	Alive	875
TCGA-EW-A1OV	1219.41	-1	1603.9	1	56	FEMALE	WHITE	Infiltrating Ductal Carcinoma	HER2	Alive	789
TCGA-EW-A1OX	514.261	0	1217.54	0	43	FEMALE	WHITE	Mucinous Carcinoma	LUMB	Alive	911
TCGA-EW-A1OY	1498.71	1	840.31	-1	63	FEMALE	WHITE	Infiltrating Ductal Carcinoma	LUMB	Alive	908
TCGA-EW-A1P0	672.475	0	1302.06	0	55	FEMALE	WHITE	Other, specify	LUMB	Alive	1251
TCGA-EW-A1P1	1750	0	1451.32	0	68	FEMALE	WHITE	Infiltrating Ductal Carcinoma	NORMAL	Alive	1210
TCGA-EW-A1P3	1041.81	1	999.443	0	48	FEMALE	WHITE	Infiltrating Ductal Carcinoma	LUMA	Alive	1611
TCGA-EW-A1P4	3878.51	1	1869.4	1	43	FEMALE	WHITE	Medullary Carcinoma	TNBC	Alive	907
TCGA-EW-A1P5	652.137	-1	1161.13	-1	77	FEMALE	WHITE	Infiltrating Ductal Carcinoma	LUMA	Alive	703
TCGA-EW-A1P6	875.248	0	1468.45	1	64	FEMALE	WHITE	Infiltrating Ductal Carcinoma	LUMA	Alive	562
TCGA-EW-A1P7	1271.52	0	1469.78	1	59	FEMALE	WHITE	Infiltrating Ductal Carcinoma	NORMAL	Alive	915
TCGA-EW-A1P8	1871.68	-1	1890.68	1	58	FEMALE	WHITE	Infiltrating Ductal Carcinoma	TNBC	Dead	239
TCGA-EW-A1PA	568.006	-1	937.464	-1	59	FEMALE	WHITE	Infiltrating Ductal Carcinoma	LUMA	Alive	575
TCGA-EW-A1PE	549.948	-1	1069.38	0	56	FEMALE	WHITE	Infiltrating Ductal Carcinoma	LUMA	Alive	320
TCGA-EW-A1PF	818.64	-1	1739.83	0	50	FEMALE	WHITE	Infiltrating Ductal Carcinoma	LUMA	Alive	439
TCGA-EW-A1PG	1363.54	0	1462.98	0	53	FEMALE	WHITE	Infiltrating Lobular Carcinoma	NORMAL	Alive	1051
TCGA-EW-A1PH	829.251	0	3307.28	1	52	FEMALE	WHITE	Infiltrating Ductal Carcinoma	TNBC	Alive	607
TCGA-EW-A2FV	737.029	-1	1231.8	1	39	FEMALE	WHITE	Other, specify	LUMA	Alive	788
TCGA-EW-A2FW	732.788	0	1293.26	0	52	FEMALE	WHITE	Other, specify	LUMB	Alive	672
TCGA-EW-A3E8	973.515	0	1032.28	0	60	FEMALE	WHITE	Infiltrating Lobular Carcinoma	LUMA	Alive	1035
TCGA-EW-A423	963.602	1	726.974	1	75	FEMALE	WHITE	Infiltrating Lobular Carcinoma	LUMA	Alive	533
TCGA-EW-A424	1027.36	0	1013	0	51	FEMALE	WHITE	Infiltrating Lobular Carcinoma	LUMA	Alive	715
TCGA-GI-A2C8	648.929	-1	1103.08	-1	63	FEMALE	WHITE	Infiltrating Ductal Carcinoma	LUMA	Alive	225
TCGA-GM-A2D9	780.911	0	785.972	0	69	FEMALE	WHITE	Infiltrating Ductal Carcinoma	LUMA	Dead	1812
TCGA-GM-A2DA	690.554	-1	983.713	0	46	FEMALE	WHITE	Infiltrating Ductal Carcinoma	LUMA	Dead	6593
TCGA-GM-A2DB	1428.04	-1	626.398	-1	62	FEMALE	WHITE	Infiltrating Ductal Carcinoma	HER2	Alive	2406
TCGA-GM-A2DC	1046.64	1	699.768	-1	57	FEMALE	WHITE	Infiltrating Ductal Carcinoma	LUMA	Alive	2535
TCGA-GM-A2DD	1050.79	-1	1041.45	-1	53	FEMALE	WHITE	Infiltrating Ductal Carcinoma	NORMAL	Alive	2282
TCGA-GM-A2DH	1104.56	0	1616.43	1	58	FEMALE	WHITE	Infiltrating Ductal Carcinoma	HER2	Alive	2193
TCGA-GM-A2DI	1122.63	-1	1311.71	0	52	FEMALE	WHITE	Infiltrating Ductal Carcinoma	LUMA	Alive	2590
TCGA-GM-A2DK	1281.72	1	1032.52	0	58	FEMALE	WHITE	Infiltrating Ductal Carcinoma	LUMA	Alive	2645
TCGA-GM-A2DL	842.53	-1	1440.03	0	50	FEMALE	WHITE	Infiltrating Ductal Carcinoma	LUMA	Alive	3519
TCGA-GM-A2DM	961.963	0	1113.32	0	57	FEMALE	WHITE	Infiltrating Ductal Carcinoma	LUMA	Alive	3226
TCGA-GM-A2DN	697.648	0	992.673	0	58	FEMALE	WHITE	Infiltrating Ductal Carcinoma	LUMA	Alive	3091
TCGA-GM-A3NW	713.599	0	841.463	0	63	FEMALE	WHITE	Infiltrating Lobular Carcinoma	LUMA	Alive	3361
TCGA-GM-A3NY	885.269	0	781.976	0	72	FEMALE	WHITE	Infiltrating Lobular Carcinoma	LUMA	Alive	1162
TCGA-GM-A3XG	1005.29	0	978.225	0	46	FEMALE	WHITE	Infiltrating Lobular Carcinoma	LUMA	Alive	1330
TCGA-GM-A3XN	1007.81	0	1006.74	0	44	FEMALE	WHITE	Infiltrating Lobular Carcinoma	LUMA	Alive	2019
TCGA-GM-A4E0	815.077	0	1166.07	0	67	FEMALE	WHITE	Infiltrating Lobular Carcinoma	LUMA	Alive	2191
TCGA-GM-A5PV	988.902	0	921.918	0	63	FEMALE	WHITE	Infiltrating Lobular Carcinoma	LUMA	Alive	412
TCGA-GM-A5PX	837.046	0	1085.19	0	65	FEMALE	WHITE	Infiltrating Lobular Carcinoma	LUMA	Alive	551
TCGA-LD-A66U	1206.74	0	701.873	0	44	FEMALE	WHITE	Infiltrating Lobular Carcinoma	LUMA	Alive	646
TCGA-LD-A74U	961.389	-1	1485.19	0	79	FEMALE	WHITE	Other, specify	LUMA	Alive	402
TCGA-LD-A7W6	702.682	0	1129.2	0	54	FEMALE	WHITE	Other, specify	LUMA	Alive	404
TCGA-LL-A440	1422.45	0	1252.44	0	61	FEMALE	WHITE	Infiltrating Lobular Carcinoma	LUMA	Alive	759
TCGA-LL-A50Y	1193.26	0	761.881	0	84	FEMALE	WHITE	Infiltrating Lobular Carcinoma	LUMA	Alive	762
TCGA-LL-A5YL	1749.65	0	1093.96	0	64	FEMALE	WHITE	Infiltrating Lobular Carcinoma	LUMA	Alive	519
TCGA-LL-A6FP	1230.51	0	724.126	0	90	FEMALE	WHITE	Infiltrating Lobular Carcinoma	LUMA	Alive	677
TCGA-LL-A9Q3	3867.64	2	1048.42	0	69	FEMALE	WHITE	Infiltrating Lobular Carcinoma	LUMA	Alive	532
TCGA-LQ-A4E4	1079.23	1	1087.21	0	73	FEMALE	WHITE	Infiltrating Lobular Carcinoma	LUMA	Alive	849
TCGA-MS-A51U	1005.74	1	875.326	-1	44	FEMALE	WHITE	Infiltrating Lobular Carcinoma	LUMA	Alive	681
TCGA-OL-A5DA	587.221	-1	1264.56	1	61	FEMALE	WHITE	Infiltrating Lobular Carcinoma	LUMA	Alive	1783
TCGA-OL-A66J	874.718	0	1165.84	0	80	FEMALE	WHITE	Infiltrating Lobular Carcinoma	LUMA	Alive	1996
TCGA-OL-A66K	967.361	1	1116.57	0	72	FEMALE	WHITE	Infiltrating Lobular Carcinoma	LUMA	Dead	1275
TCGA-OL-A66N	1361.28	0	733.652	0	59	FEMALE	WHITE	Infiltrating Lobular Carcinoma	LUMA	Alive	792
TCGA-OL-A6VQ	915.216	0	1333.43	0	49	FEMALE	WHITE	Infiltrating Lobular Carcinoma	LUMA	Alive	600
TCGA-PE-A5DC	670.458	-1	1315.59	0	72	FEMALE	WHITE	Infiltrating Lobular Carcinoma	LUMA	Dead	1430
TCGA-PE-A5DE	1075.73	-1	1270.26	1	41	FEMALE	WHITE	Infiltrating Lobular Carcinoma	LUMA	Alive	2645
TCGA-W8-A86G	931.656	0	833.887	0	66	FEMALE	WHITE	Infiltrating Lobular Carcinoma	LUMA	Alive	347
TCGA-WT-AB44	2248.83	-1	700.468	0	77	FEMALE	WHITE	Infiltrating Lobular Carcinoma	LUMA	Alive	883
TCGA-XX-A899	894.882	0	1295.28	0	46	FEMALE	WHITE	Infiltrating Lobular Carcinoma	LUMA	Alive	467
TCGA-XX-A89A	798.299	-1	1469.06	0	68	FEMALE	WHITE	Infiltrating Lobular Carcinoma	LUMA	Alive	488
TCGA-Z7-A8R5	1378.61	0	1079.35	1	61	FEMALE	WHITE	Infiltrating Lobular Carcinoma	LUMA	Alive	3287
TCGA-Z7-A8R6	1057.16	0	1236.71	0	46	FEMALE	WHITE	Infiltrating Lobular Carcinoma	LUMB	Alive	3256

## Sheet: Table S9
Table S9
Correlation between MKK3 overexpression and breast cancer patient survival
COHORT: patient cohort HISTOLOGICAL_TYPE: histological type of breast cancer BRCA_SUBTYPE: subtype of breast cancer TOTAL: number of patients in the cohort MAP2K3_UP_SAMPLES: number of samples with overexpressed MAP2K3 MAP2K3_DOWN_SAMPLES: number of samples with underexpressed MAP2K3 MAP2K3_NORMAL_SAMPLES: number of samples with not altered expression MAP2K3_UP_PRCNT: percent of samples with over…
COHORT	BRCA_SUBTYPE	HISTOLOGICAL_TYPE	TOTAL	MAP2K3_UP_SAMPLES	MAP2K3_DOWN_SAMPLES	MAP2K3_NORMAL_SAMPLES	MAP2K3_UP_PRCNT	MAP2K3_DOWN_PRCNT	MAP2K3_MORMAL_PRCNT	P_VALUE
ALL	ALL	ALL	1055	61	5	989	5.78199	0.473934	93.7441	0.478903
ALL	ALL	Infiltrating Lobular Carcinoma	199	8	0	191	4.0201	0	95.9799	0.494792
ALL	ALL	Infiltrating Ductal Carcinoma	750	42	5	703	5.6	0.666667	93.7333	0.768641
ALL	ALL	Other, specify	44	2	0	42	4.54545	0	95.4545	0.616124
ALL	ALL	Mixed Histology (please specify)	29	3	0	26	10.3448	0	89.6552	0.0220923
ALL	ALL	Mucinous Carcinoma	17	1	0	16	5.88235	0	94.1176	0.653109
ALL	ALL	Metaplastic Carcinoma	8	3	0	5	37.5	0	62.5	0.317311
ALL	ALL	Infiltrating Carcinoma NOS	1	0	0	1	0	0	100	NA
ALL	ALL	Medullary Carcinoma	6	2	0	4	33.3333	0	66.6667	1
ALL	TNBC	ALL	185	31	0	154	16.7568	0	83.2432	0.00437932
ALL	TNBC	Infiltrating Lobular Carcinoma	2	0	0	2	0	0	100	NA
ALL	TNBC	Infiltrating Ductal Carcinoma	159	23	0	136	14.4654	0	85.5346	0.0412497
ALL	TNBC	Other, specify	8	1	0	7	12.5	0	87.5	0.128359
ALL	TNBC	Mixed Histology (please specify)	3	2	0	1	66.6667	0	33.3333	0.317311
ALL	TNBC	Mucinous Carcinoma	0	0	0	0	0	0	0	NA
ALL	TNBC	Metaplastic Carcinoma	6	3	0	3	50	0	50	0.317311
ALL	TNBC	Infiltrating Carcinoma NOS	1	0	0	1	0	0	100	NA
ALL	TNBC	Medullary Carcinoma	5	2	0	3	40	0	60	1
ALL	LUMA	ALL	547	12	2	533	2.19378	0.365631	97.4406	0.438532
ALL	LUMA	Infiltrating Lobular Carcinoma	167	4	0	163	2.39521	0	97.6048	0.738749
ALL	LUMA	Infiltrating Ductal Carcinoma	325	7	2	316	2.15385	0.615385	97.2308	0.555824
ALL	LUMA	Other, specify	22	0	0	22	0	0	100	NA
ALL	LUMA	Mixed Histology (please specify)	21	1	0	20	4.7619	0	95.2381	1
ALL	LUMA	Mucinous Carcinoma	12	0	0	12	0	0	100	NA
ALL	LUMA	Metaplastic Carcinoma	0	0	0	0	0	0	0	NA
ALL	LUMA	Infiltrating Carcinoma NOS	0	0	0	0	0	0	0	NA
ALL	LUMA	Medullary Carcinoma	0	0	0	0	0	0	0	NA
ALL	LUMB	ALL	203	6	3	194	2.95567	1.47783	95.5665	0.449141
ALL	LUMB	Infiltrating Lobular Carcinoma	12	1	0	11	8.33333	0	91.6667	1
ALL	LUMB	Infiltrating Ductal Carcinoma	171	4	3	164	2.33918	1.75439	95.9064	0.482056
ALL	LUMB	Other, specify	9	0	0	9	0	0	100	NA
ALL	LUMB	Mixed Histology (please specify)	5	0	0	5	0	0	100	NA
ALL	LUMB	Mucinous Carcinoma	5	1	0	4	20	0	80	1
ALL	LUMB	Metaplastic Carcinoma	0	0	0	0	0	0	0	NA
ALL	LUMB	Infiltrating Carcinoma NOS	0	0	0	0	0	0	0	NA
ALL	LUMB	Medullary Carcinoma	1	0	0	1	0	0	100	NA
ALL	HER2	ALL	81	8	0	73	9.87654	0	90.1235	0.154564
ALL	HER2	Infiltrating Lobular Carcinoma	4	0	0	4	0	0	100	NA
ALL	HER2	Infiltrating Ductal Carcinoma	74	7	0	67	9.45946	0	90.5405	0.24963
ALL	HER2	Other, specify	2	1	0	1	50	0	50	1
ALL	HER2	Mixed Histology (please specify)	0	0	0	0	0	0	0	NA
ALL	HER2	Mucinous Carcinoma	0	0	0	0	0	0	0	NA
ALL	HER2	Metaplastic Carcinoma	1	0	0	1	0	0	100	NA
ALL	HER2	Infiltrating Carcinoma NOS	0	0	0	0	0	0	0	NA
ALL	HER2	Medullary Carcinoma	0	0	0	0	0	0	0	NA
ALL	NORMAL	ALL	39	4	0	35	10.2564	0	89.7436	0.384868
ALL	NORMAL	Infiltrating Lobular Carcinoma	14	3	0	11	21.4286	0	78.5714	0.637352
ALL	NORMAL	Infiltrating Ductal Carcinoma	21	1	0	20	4.7619	0	95.2381	0.590843
ALL	NORMAL	Other, specify	3	0	0	3	0	0	100	NA
ALL	NORMAL	Mixed Histology (please specify)	0	0	0	0	0	0	0	NA
ALL	NORMAL	Mucinous Carcinoma	0	0	0	0	0	0	0	NA
ALL	NORMAL	Metaplastic Carcinoma	1	0	0	1	0	0	100	NA
ALL	NORMAL	Infiltrating Carcinoma NOS	0	0	0	0	0	0	0	NA
ALL	NORMAL	Medullary Carcinoma	0	0	0	0	0	0	0	NA
BLACK OR AFRICAN AMERICAN	ALL	ALL	178	17	1	160	9.55056	0.561798	89.8876	0.00168864
BLACK OR AFRICAN AMERICAN	ALL	Infiltrating Lobular Carcinoma	13	1	0	12	7.69231	0	92.3077	0.648133
BLACK OR AFRICAN AMERICAN	ALL	Infiltrating Ductal Carcinoma	148	14	1	133	9.45946	0.675676	89.8649	0.00331332
BLACK OR AFRICAN AMERICAN	ALL	Other, specify	7	1	0	6	14.2857	0	85.7143	0.0455003
BLACK OR AFRICAN AMERICAN	ALL	Mixed Histology (please specify)	4	1	0	3	25	0	75	0.157299
BLACK OR AFRICAN AMERICAN	ALL	Mucinous Carcinoma	1	0	0	1	0	0	100	NA
BLACK OR AFRICAN AMERICAN	ALL	Metaplastic Carcinoma	1	0	0	1	0	0	100	NA
BLACK OR AFRICAN AMERICAN	ALL	Infiltrating Carcinoma NOS	1	0	0	1	0	0	100	NA
BLACK OR AFRICAN AMERICAN	ALL	Medullary Carcinoma	3	0	0	3	0	0	100	NA
BLACK OR AFRICAN AMERICAN	TNBC	ALL	63	12	0	51	19.0476	0	80.9524	0.000193789
BLACK OR AFRICAN AMERICAN	TNBC	Infiltrating Lobular Carcinoma	1	0	0	1	0	0	100	NA
BLACK OR AFRICAN AMERICAN	TNBC	Infiltrating Ductal Carcinoma	55	10	0	45	18.1818	0	81.8182	0.00590323
BLACK OR AFRICAN AMERICAN	TNBC	Other, specify	2	1	0	1	50	0	50	0.317311
BLACK OR AFRICAN AMERICAN	TNBC	Mixed Histology (please specify)	1	1	0	0	100	0	0	NA
BLACK OR AFRICAN AMERICAN	TNBC	Mucinous Carcinoma	0	0	0	0	0	0	0	NA
BLACK OR AFRICAN AMERICAN	TNBC	Metaplastic Carcinoma	1	0	0	1	0	0	100	NA
BLACK OR AFRICAN AMERICAN	TNBC	Infiltrating Carcinoma NOS	1	0	0	1	0	0	100	NA
BLACK OR AFRICAN AMERICAN	TNBC	Medullary Carcinoma	2	0	0	2	0	0	100	NA
BLACK OR AFRICAN AMERICAN	LUMA	ALL	61	1	0	60	1.63934	0	98.3607	0.735048
BLACK OR AFRICAN AMERICAN	LUMA	Infiltrating Lobular Carcinoma	8	0	0	8	0	0	100	NA
BLACK OR AFRICAN AMERICAN	LUMA	Infiltrating Ductal Carcinoma	46	1	0	45	2.17391	0	97.8261	1
BLACK OR AFRICAN AMERICAN	LUMA	Other, specify	3	0	0	3	0	0	100	NA
BLACK OR AFRICAN AMERICAN	LUMA	Mixed Histology (please specify)	3	0	0	3	0	0	100	NA
BLACK OR AFRICAN AMERICAN	LUMA	Mucinous Carcinoma	1	0	0	1	0	0	100	NA
BLACK OR AFRICAN AMERICAN	LUMA	Metaplastic Carcinoma	0	0	0	0	0	0	0	NA
BLACK OR AFRICAN AMERICAN	LUMA	Infiltrating Carcinoma NOS	0	0	0	0	0	0	0	NA
BLACK OR AFRICAN AMERICAN	LUMA	Medullary Carcinoma	0	0	0	0	0	0	0	NA
BLACK OR AFRICAN AMERICAN	LUMB	ALL	28	0	1	27	0	3.57143	96.4286	NA
BLACK OR AFRICAN AMERICAN	LUMB	Infiltrating Lobular Carcinoma	2	0	0	2	0	0	100	NA
BLACK OR AFRICAN AMERICAN	LUMB	Infiltrating Ductal Carcinoma	24	0	1	23	0	4.16667	95.8333	NA
BLACK OR AFRICAN AMERICAN	LUMB	Other, specify	1	0	0	1	0	0	100	NA
BLACK OR AFRICAN AMERICAN	LUMB	Mixed Histology (please specify)	0	0	0	0	0	0	0	NA
BLACK OR AFRICAN AMERICAN	LUMB	Mucinous Carcinoma	0	0	0	0	0	0	0	NA
BLACK OR AFRICAN AMERICAN	LUMB	Metaplastic Carcinoma	0	0	0	0	0	0	0	NA
BLACK OR AFRICAN AMERICAN	LUMB	Infiltrating Carcinoma NOS	0	0	0	0	0	0	0	NA
BLACK OR AFRICAN AMERICAN	LUMB	Medullary Carcinoma	1	0	0	1	0	0	100	NA
BLACK OR AFRICAN AMERICAN	HER2	ALL	16	2	0	14	12.5	0	87.5	0.705457
BLACK OR AFRICAN AMERICAN	HER2	Infiltrating Lobular Carcinoma	1	0	0	1	0	0	100	NA
BLACK OR AFRICAN AMERICAN	HER2	Infiltrating Ductal Carcinoma	15	2	0	13	13.3333	0	86.6667	0.694887
BLACK OR AFRICAN AMERICAN	HER2	Other, specify	0	0	0	0	0	0	0	NA
BLACK OR AFRICAN AMERICAN	HER2	Mixed Histology (please specify)	0	0	0	0	0	0	0	NA
BLACK OR AFRICAN AMERICAN	HER2	Mucinous Carcinoma	0	0	0	0	0	0	0	NA
BLACK OR AFRICAN AMERICAN	HER2	Metaplastic Carcinoma	0	0	0	0	0	0	0	NA
BLACK OR AFRICAN AMERICAN	HER2	Infiltrating Carcinoma NOS	0	0	0	0	0	0	0	NA
BLACK OR AFRICAN AMERICAN	HER2	Medullary Carcinoma	0	0	0	0	0	0	0	NA
BLACK OR AFRICAN AMERICAN	NORMAL	ALL	10	2	0	8	20	0	80	0.266713
BLACK OR AFRICAN AMERICAN	NORMAL	Infiltrating Lobular Carcinoma	1	1	0	0	100	0	0	NA
BLACK OR AFRICAN AMERICAN	NORMAL	Infiltrating Ductal Carcinoma	8	1	0	7	12.5	0	87.5	0.417304
BLACK OR AFRICAN AMERICAN	NORMAL	Other, specify	1	0	0	1	0	0	100	NA
BLACK OR AFRICAN AMERICAN	NORMAL	Mixed Histology (please specify)	0	0	0	0	0	0	0	NA
BLACK OR AFRICAN AMERICAN	NORMAL	Mucinous Carcinoma	0	0	0	0	0	0	0	NA
BLACK OR AFRICAN AMERICAN	NORMAL	Metaplastic Carcinoma	0	0	0	0	0	0	0	NA
BLACK OR AFRICAN AMERICAN	NORMAL	Infiltrating Carcinoma NOS	0	0	0	0	0	0	0	NA
BLACK OR AFRICAN AMERICAN	NORMAL	Medullary Carcinoma	0	0	0	0	0	0	0	NA
ASIAN	ALL	ALL	60	4	0	56	6.66667	0	93.3333	0.585113
ASIAN	ALL	Infiltrating Lobular Carcinoma	8	0	0	8	0	0	100	NA
ASIAN	ALL	Infiltrating Ductal Carcinoma	46	4	0	42	8.69565	0	91.3043	0.683091
ASIAN	ALL	Other, specify	3	0	0	3	0	0	100	NA
ASIAN	ALL	Mixed Histology (please specify)	0	0	0	0	0	0	0	NA
ASIAN	ALL	Mucinous Carcinoma	2	0	0	2	0	0	100	NA
ASIAN	ALL	Metaplastic Carcinoma	1	0	0	1	0	0	100	NA
ASIAN	ALL	Infiltrating Carcinoma NOS	0	0	0	0	0	0	0	NA
ASIAN	ALL	Medullary Carcinoma	0	0	0	0	0	0	0	NA
ASIAN	TNBC	ALL	7	0	0	7	0	0	100	NA
ASIAN	TNBC	Infiltrating Lobular Carcinoma	0	0	0	0	0	0	0	NA
ASIAN	TNBC	Infiltrating Ductal Carcinoma	6	0	0	6	0	0	100	NA
ASIAN	TNBC	Other, specify	1	0	0	1	0	0	100	NA
ASIAN	TNBC	Mixed Histology (please specify)	0	0	0	0	0	0	0	NA
ASIAN	TNBC	Mucinous Carcinoma	0	0	0	0	0	0	0	NA
ASIAN	TNBC	Metaplastic Carcinoma	0	0	0	0	0	0	0	NA
ASIAN	TNBC	Infiltrating Carcinoma NOS	0	0	0	0	0	0	0	NA
ASIAN	TNBC	Medullary Carcinoma	0	0	0	0	0	0	0	NA
ASIAN	LUMA	ALL	20	1	0	19	5	0	95	1
ASIAN	LUMA	Infiltrating Lobular Carcinoma	5	0	0	5	0	0	100	NA
ASIAN	LUMA	Infiltrating Ductal Carcinoma	13	1	0	12	7.69231	0	92.3077	1
ASIAN	LUMA	Other, specify	1	0	0	1	0	0	100	NA
ASIAN	LUMA	Mixed Histology (please specify)	0	0	0	0	0	0	0	NA
ASIAN	LUMA	Mucinous Carcinoma	1	0	0	1	0	0	100	NA
ASIAN	LUMA	Metaplastic Carcinoma	0	0	0	0	0	0	0	NA
ASIAN	LUMA	Infiltrating Carcinoma NOS	0	0	0	0	0	0	0	NA
ASIAN	LUMA	Medullary Carcinoma	0	0	0	0	0	0	0	NA
ASIAN	LUMB	ALL	16	1	0	15	6.25	0	93.75	1
ASIAN	LUMB	Infiltrating Lobular Carcinoma	1	0	0	1	0	0	100	NA
ASIAN	LUMB	Infiltrating Ductal Carcinoma	13	1	0	12	7.69231	0	92.3077	1
ASIAN	LUMB	Other, specify	1	0	0	1	0	0	100	NA
ASIAN	LUMB	Mixed Histology (please specify)	0	0	0	0	0	0	0	NA
ASIAN	LUMB	Mucinous Carcinoma	1	0	0	1	0	0	100	NA
ASIAN	LUMB	Metaplastic Carcinoma	0	0	0	0	0	0	0	NA
ASIAN	LUMB	Infiltrating Carcinoma NOS	0	0	0	0	0	0	0	NA
ASIAN	LUMB	Medullary Carcinoma	0	0	0	0	0	0	0	NA
ASIAN	HER2	ALL	16	2	0	14	12.5	0	87.5	0.317311
ASIAN	HER2	Infiltrating Lobular Carcinoma	1	0	0	1	0	0	100	NA
ASIAN	HER2	Infiltrating Ductal Carcinoma	14	2	0	12	14.2857	0	85.7143	0.157299
ASIAN	HER2	Other, specify	0	0	0	0	0	0	0	NA
ASIAN	HER2	Mixed Histology (please specify)	0	0	0	0	0	0	0	NA
ASIAN	HER2	Mucinous Carcinoma	0	0	0	0	0	0	0	NA
ASIAN	HER2	Metaplastic Carcinoma	1	0	0	1	0	0	100	NA
ASIAN	HER2	Infiltrating Carcinoma NOS	0	0	0	0	0	0	0	NA
ASIAN	HER2	Medullary Carcinoma	0	0	0	0	0	0	0	NA
ASIAN	NORMAL	ALL	1	0	0	1	0	0	100	NA
ASIAN	NORMAL	Infiltrating Lobular Carcinoma	1	0	0	1	0	0	100	NA
ASIAN	NORMAL	Infiltrating Ductal Carcinoma	0	0	0	0	0	0	0	NA
ASIAN	NORMAL	Other, specify	0	0	0	0	0	0	0	NA
ASIAN	NORMAL	Mixed Histology (please specify)	0	0	0	0	0	0	0	NA
ASIAN	NORMAL	Mucinous Carcinoma	0	0	0	0	0	0	0	NA
ASIAN	NORMAL	Metaplastic Carcinoma	0	0	0	0	0	0	0	NA
ASIAN	NORMAL	Infiltrating Carcinoma NOS	0	0	0	0	0	0	0	NA
ASIAN	NORMAL	Medullary Carcinoma	0	0	0	0	0	0	0	NA
WHITE	ALL	ALL	729	38	3	688	5.21262	0.411523	94.3759	0.355032
WHITE	ALL	Infiltrating Lobular Carcinoma	163	6	0	157	3.68098	0	96.319	0.680978
WHITE	ALL	Infiltrating Ductal Carcinoma	485	23	3	459	4.74227	0.618557	94.6392	0.271973
WHITE	ALL	Other, specify	34	1	0	33	2.94118	0	97.0588	0.412957
WHITE	ALL	Mixed Histology (please specify)	23	2	0	21	8.69565	0	91.3043	0.808365
WHITE	ALL	Mucinous Carcinoma	14	1	0	13	7.14286	0	92.8571	0.627036
WHITE	ALL	Metaplastic Carcinoma	6	3	0	3	50	0	50	0.4795
WHITE	ALL	Infiltrating Carcinoma NOS	0	0	0	0	0	0	0	NA
WHITE	ALL	Medullary Carcinoma	3	2	0	1	66.6667	0	33.3333	1
WHITE	TNBC	ALL	109	19	0	90	17.4312	0	82.5688	0.58243
WHITE	TNBC	Infiltrating Lobular Carcinoma	0	0	0	0	0	0	0	NA
WHITE	TNBC	Infiltrating Ductal Carcinoma	93	13	0	80	13.9785	0	86.0215	0.771962
WHITE	TNBC	Other, specify	5	0	0	5	0	0	100	NA
WHITE	TNBC	Mixed Histology (please specify)	2	1	0	1	50	0	50	1
WHITE	TNBC	Mucinous Carcinoma	0	0	0	0	0	0	0	NA
WHITE	TNBC	Metaplastic Carcinoma	5	3	0	2	60	0	40	0.4795
WHITE	TNBC	Infiltrating Carcinoma NOS	0	0	0	0	0	0	0	NA
WHITE	TNBC	Medullary Carcinoma	3	2	0	1	66.6667	0	33.3333	1
WHITE	LUMA	ALL	426	9	2	415	2.11268	0.469484	97.4178	0.516033
WHITE	LUMA	Infiltrating Lobular Carcinoma	144	4	0	140	2.77778	0	97.2222	0.734795
WHITE	LUMA	Infiltrating Ductal Carcinoma	237	4	2	231	1.68776	0.843882	97.4684	0.638134
WHITE	LUMA	Other, specify	18	0	0	18	0	0	100	NA
WHITE	LUMA	Mixed Histology (please specify)	17	1	0	16	5.88235	0	94.1176	1
WHITE	LUMA	Mucinous Carcinoma	10	0	0	10	0	0	100	NA
WHITE	LUMA	Metaplastic Carcinoma	0	0	0	0	0	0	0	NA
WHITE	LUMA	Infiltrating Carcinoma NOS	0	0	0	0	0	0	0	NA
WHITE	LUMA	Medullary Carcinoma	0	0	0	0	0	0	0	NA
WHITE	LUMB	ALL	129	4	1	124	3.10078	0.775194	96.124	0.517797
WHITE	LUMB	Infiltrating Lobular Carcinoma	7	0	0	7	0	0	100	NA
WHITE	LUMB	Infiltrating Ductal Carcinoma	107	3	1	103	2.80374	0.934579	96.2617	0.550798
WHITE	LUMB	Other, specify	7	0	0	7	0	0	100	NA
WHITE	LUMB	Mixed Histology (please specify)	4	0	0	4	0	0	100	NA
WHITE	LUMB	Mucinous Carcinoma	4	1	0	3	25	0	75	1
WHITE	LUMB	Metaplastic Carcinoma	0	0	0	0	0	0	0	NA
WHITE	LUMB	Infiltrating Carcinoma NOS	0	0	0	0	0	0	0	NA
WHITE	LUMB	Medullary Carcinoma	0	0	0	0	0	0	0	NA
WHITE	HER2	ALL	38	4	0	34	10.5263	0	89.4737	0.157718
WHITE	HER2	Infiltrating Lobular Carcinoma	0	0	0	0	0	0	0	NA
WHITE	HER2	Infiltrating Ductal Carcinoma	36	3	0	33	8.33333	0	91.6667	0.309737
WHITE	HER2	Other, specify	2	1	0	1	50	0	50	1
WHITE	HER2	Mixed Histology (please specify)	0	0	0	0	0	0	0	NA
WHITE	HER2	Mucinous Carcinoma	0	0	0	0	0	0	0	NA
WHITE	HER2	Metaplastic Carcinoma	0	0	0	0	0	0	0	NA
WHITE	HER2	Infiltrating Carcinoma NOS	0	0	0	0	0	0	0	NA
WHITE	HER2	Medullary Carcinoma	0	0	0	0	0	0	0	NA
WHITE	NORMAL	ALL	27	2	0	25	7.40741	0	92.5926	0.827259
WHITE	NORMAL	Infiltrating Lobular Carcinoma	12	2	0	10	16.6667	0	83.3333	0.738883
WHITE	NORMAL	Infiltrating Ductal Carcinoma	12	0	0	12	0	0	100	NA
WHITE	NORMAL	Other, specify	2	0	0	2	0	0	100	NA
WHITE	NORMAL	Mixed Histology (please specify)	0	0	0	0	0	0	0	NA
WHITE	NORMAL	Mucinous Carcinoma	0	0	0	0	0	0	0	NA
WHITE	NORMAL	Metaplastic Carcinoma	1	0	0	1	0	0	100	NA
WHITE	NORMAL	Infiltrating Carcinoma NOS	0	0	0	0	0	0	0	NA
WHITE	NORMAL	Medullary Carcinoma	0	0	0	0	0	0	0	NA

## Sheet: Table S10
Table S10
MKK3 gene set enrichment analysis using the MSigDB cancer Hallmark sets
NAME: name of the gene set SIZE: number of genes in the gene set ES: enrichment score NES: normalized enrichment score NOM_PVAL: nominal p-value FDR_QVAL: false discovery rate q-value
NAME	SIZE	ES	NES	NOM_PVAL	FDR_QVAL
HALLMARK_MYC_TARGETS_V2	58	0.707573	1.66992	0.00610874	0.133777
HALLMARK_MYC_TARGETS_V1	191	0.582167	1.63577	0.0377895	0.0472667
HALLMARK_UNFOLDED_PROTEIN_RESPONSE	108	0.445688	1.65729	0.01002	0.115048
HALLMARK_MTORC1_SIGNALING	195	0.457914	1.55846	0.0441767	0.195814
HALLMARK_UV_RESPONSE_UP	154	0.385895	1.53467	0.0217822	0.184037
HALLMARK_GLYCOLYSIS	195	0.400947	1.50633	0.0585774	0.191853
HALLMARK_E2F_TARGETS	189	0.494375	1.46965	0.0944123	0.208525
HALLMARK_DNA_REPAIR	139	0.398529	1.3954	0.143145	0.292739
HALLMARK_OXIDATIVE_PHOSPHORYLATION	182	0.422451	1.34077	0.199203	0.347319
HALLMARK_PI3K_AKT_MTOR_SIGNALING	104	0.332587	1.25291	0.160714	0.471088
HALLMARK_P53_PATHWAY	194	0.316561	1.24108	0.175803	0.451394
HALLMARK_G2M_CHECKPOINT	186	0.381704	1.22578	0.255859	0.443078
HALLMARK_ESTROGEN_RESPONSE_LATE	196	0.278603	1.19302	0.140039	0.465124
HALLMARK_REACTIVE_OXYGEN_SPECIES_PATHWAY	45	0.363815	1.18652	0.2643	0.444083
HALLMARK_FATTY_ACID_METABOLISM	155	0.266455	1.14003	0.239437	0.504066
HALLMARK_APICAL_SURFACE	43	0.276198	1.08568	0.296512	0.577964
HALLMARK_TNFA_SIGNALING_VIA_NFKB	196	0.28881	1.0067	0.425197	0.717706
HALLMARK_WNT_BETA_CATENIN_SIGNALING	42	0.256358	0.975384	0.528376	0.749265
HALLMARK_ADIPOGENESIS	190	0.237235	0.971776	0.506122	0.718646
HALLMARK_HEME_METABOLISM	193	0.216246	0.960043	0.537849	0.709784
HALLMARK_ESTROGEN_RESPONSE_EARLY	192	0.211772	0.946635	0.578947	0.705622
HALLMARK_XENOBIOTIC_METABOLISM	199	0.216933	0.919266	0.604463	0.727642
HALLMARK_APICAL_JUNCTION	194	0.234204	0.895125	0.586207	0.741474
HALLMARK_HYPOXIA	190	0.221259	0.80959	0.691837	0.877119
HALLMARK_CHOLESTEROL_HOMEOSTASIS	73	0.18821	0.716865	0.923387	0.984271
HALLMARK_MITOTIC_SPINDLE	196	0.19234	0.691086	0.785029	0.97677
HALLMARK_ANDROGEN_RESPONSE	96	0.173085	0.626944	0.967546	1
HALLMARK_INTERFERON_ALPHA_RESPONSE	92	0.213837	0.595125	0.870902	0.984158
HALLMARK_IL6_JAK_STAT3_SIGNALING	86	0.168264	0.542317	0.96	0.97285
HALLMARK_INTERFERON_GAMMA_RESPONSE	197	-0.15494	-0.466998	0.996016	0.992146
HALLMARK_PANCREAS_BETA_CELLS	40	-0.176901	-0.54218	0.990158	1
HALLMARK_PROTEIN_SECRETION	95	-0.179283	-0.579651	0.939271	1
HALLMARK_PEROXISOME	101	-0.154212	-0.688824	0.98	1
HALLMARK_ANGIOGENESIS	36	-0.26981	-0.768912	0.78835	0.970458
HALLMARK_APOPTOSIS	159	-0.188846	-0.805074	0.84263	0.962397
HALLMARK_INFLAMMATORY_RESPONSE	197	-0.246066	-0.860672	0.667954	0.901126
HALLMARK_COMPLEMENT	194	-0.253987	-0.863636	0.678788	0.958317
HALLMARK_COAGULATION	136	-0.249995	-0.868735	0.613333	1
HALLMARK_TGF_BETA_SIGNALING	54	-0.286658	-0.915388	0.546559	0.976537
HALLMARK_SPERMATOGENESIS	134	-0.212136	-0.93074	0.61167	1
HALLMARK_EPITHELIAL_MESENCHYMAL_TRANSITION	194	-0.324492	-0.941781	0.520833	1
HALLMARK_HEDGEHOG_SIGNALING	35	-0.271623	-0.9575	0.560484	1
HALLMARK_MYOGENESIS	199	-0.264139	-0.968603	0.488281	1
HALLMARK_KRAS_SIGNALING_DN	189	-0.239128	-0.969258	0.491124	1
HALLMARK_BILE_ACID_METABOLISM	112	-0.238144	-0.973327	0.494118	1
HALLMARK_ALLOGRAFT_REJECTION	199	-0.335758	-1.12165	0.343313	1
HALLMARK_IL2_STAT5_SIGNALING	195	-0.305198	-1.17813	0.248047	1
HALLMARK_KRAS_SIGNALING_UP	194	-0.354068	-1.18931	0.244186	1
HALLMARK_UV_RESPONSE_DN	136	-0.394551	-1.28114	0.172	1
HALLMARK_NOTCH_SIGNALING	32	-0.36767	-1.30375	0.10728	1

[truncated: 2 more sheets: Table S11, Table S12]
